# Supplementary material for: Computed thermodynamic stabilities of silylium Lewis base adducts
Source: Royal Society of Chemistry journal article supplement (doi:10.1039/c8ob00354h), 2018-01-01
Supplement: c8ob00354h1.pdf [file c8ob00354h1.pdf]

## ***Supporting Information***

### **Computed thermodynamic stabilities of silylium Lewis base adducts**

Christina A. Roselli and Michel R. Gagné\*

Department of Chemistry, University of North Carolina at Chapel Hill, Chapel Hill, North Carolina, 27599 USA

mgagne@unc.edu

#### **Contents**

|    |                                               |         |
|----|-----------------------------------------------|---------|
| 1. | Basis set comparisons                         | S2      |
| 2. | References                                    | S2      |
| 3. | Table of summarized energies                  | S3-S6   |
| 4. | Optimized coordinates and Gibbs free energies | S6-S104 |

## 1. Basis set comparisons

| BCF        | + | PPh <sub>3</sub> | + | HSiMe <sub>3</sub> | $\xrightarrow{\text{CH}_2\text{Cl}_2}$ | Me <sub>3</sub> Si <sup>⊕</sup> -PPh <sub>3</sub> | + | H-BCF <sup>⊖</sup>                       |
|------------|---|------------------|---|--------------------|----------------------------------------|---------------------------------------------------|---|------------------------------------------|
| Basis set  |   |                  |   |                    |                                        | $\Delta G$ (kcal/mol)                             |   | $\Delta\Delta G$ (kcal/mol) <sup>c</sup> |
| 6-31G      |   |                  |   |                    |                                        | -5.52                                             |   | -2.91                                    |
| 6-31G*     |   |                  |   |                    |                                        | 2.29                                              |   | 4.91                                     |
| 6-31+G*    |   |                  |   |                    |                                        | -3.12                                             |   | -0.51                                    |
| 6-31+G**   |   |                  |   |                    |                                        | -2.61                                             |   | --                                       |
| 6-311+G*   |   |                  |   |                    |                                        | -3.17                                             |   | -0.55                                    |
| 6-311+G**  |   |                  |   |                    |                                        | -2.48                                             |   | 0.13                                     |
| 6-311++G** |   |                  |   |                    |                                        | -2.56                                             |   | 0.05                                     |

**Table S1.** Calculations for the splitting of trimethylsilane with BCF and PPh<sub>3</sub>.<sup>a</sup>

<sup>a</sup>All calculations were run using the  $\omega$ B97X-D functional using the CPCM solvation mode with solvent parameters for dichloromethane. <sup>b</sup>The time listed represents the amount of time for all calculations in the reaction scheme to converge. To make for a fair comparison, the calculations were performed starting from the same structure for each molecule. <sup>c</sup> $\Delta\Delta G$  represents the difference in Gibbs free energy between the other basis set relative to 6-31+G\*\* which was chosen for the paper.

To determine the best basis set for the scope of the paper, several basis sets were screened using the  $\omega$ B97X-D functional. We aimed to strike a balance between minimized energy and computational cost. Assuming the 6-311++G\*\* basis set gives the most accurate energy for the reaction shown in Table S1, we compared the Gibbs free energies of seven different basis sets. For the paper, we chose 6-31+G\*\* as our basis set as the value for the test calculation comes close to that of the 6-311++G\*\* basis set in less than half the computational time.

## 2. References

Full Gaussian Reference: Gaussian 09, Revision E.01, M. J. Frisch, G. W. Trucks, H. B. Schlegel, G. E. Scuseria, M. A. Robb, J. R. Cheeseman, G. Scalmani, V. Barone, G. A. Petersson, H. Nakatsuji, X. Li, M. Caricato, A. Marenich, J. Bloino, B. G. Janesko, R. Gomperts, B. Mennucci, H. P. Hratchian, J. V. Ortiz, A. F. Izmaylov, J. L. Sonnenberg, D. Williams-Young, F. Ding, F. Lipparini, F. Egidi, J. Goings, B. Peng, A. Petrone, T. Henderson, D. Ranasinghe, V. G. Zakrzewski, J. Gao, N. Rega, G. Zheng, W. Liang, M. Hada, M. Ehara, K. Toyota, R. Fukuda, J. Hasegawa, M. Ishida, T. Nakajima, Y. Honda, O. Kitao, H. Nakai, T. Vreven, K. Throssell, J. A. Montgomery, Jr., J. E. Peralta, F. Ogliaro, M. Bearpark, J. J. Heyd, E. Brothers, K. N. Kudin, V. N. Staroverov, T. Keith, R. Kobayashi, J. Normand, K. Raghavachari, A. Rendell, J. C. Burant, S. S. Iyengar, J. Tomasi, M. Cossi, J. M. Millam, M. Klene, C. Adamo, R. Cammi, J. W. Ochterski, R. L. Martin, K. Morokuma, O. Farkas, J. B. Foresman, and D. J. Fox, Gaussian, Inc., Wallingford CT, **2016**.

### 3. Table of summarized energies

| Compound                                                                               | Absolute E (a.u.) | # imaginary freq | Zero Point E (a.u.) | G (a.u.)  |
|----------------------------------------------------------------------------------------|-------------------|------------------|---------------------|-----------|
| Me <sub>3</sub> Si-PPh <sub>3</sub> <sup>+</sup>                                       | -1445.191         | 0                | -1444.799           | -1444.852 |
| PPh <sub>3</sub>                                                                       | -1036.094         | 0                | -1035.818           | -1035.863 |
| 2-Me-THF                                                                               | -271.712          | 0                | -271.566            | -271.596  |
| Me <sub>3</sub> Si-2-Me-THF <sup>+</sup>                                               | -680.803          | 0                | -680.541            | -680.580  |
| Me <sub>2</sub> EtSi-PPh <sub>3</sub> <sup>+</sup>                                     | -1484.494         | 0                | -1484.072           | -1484.129 |
| Me <sub>2</sub> EtSi-2-Me-THF <sup>+</sup>                                             | -720.105          | 0                | -719.813            | -719.854  |
| Et <sub>3</sub> Si-PPh <sub>3</sub> <sup>+</sup>                                       | -1563.097         | 0                | -1562.616           | -1562.674 |
| Et <sub>3</sub> Si-2-Me-THF <sup>+</sup>                                               | -798.709          | 0                | -798.359            | -798.403  |
| Me <sub>2</sub> PhSi-PPh <sub>3</sub> <sup>+</sup>                                     | -1636.872         | 0                | -1636.424           | -1636.482 |
| Me <sub>2</sub> PhSi-2-Me-THF <sup>+</sup>                                             | -872.480          | 0                | -872.163            | -872.209  |
| Ph <sub>3</sub> Si-PPh <sub>3</sub> <sup>+</sup>                                       | -2020.232         | 0                | -2019.674           | -2019.741 |
| Ph <sub>3</sub> Si-2-Me-THF <sup>+</sup>                                               | -1255.834         | 0                | -1255.407           | -1255.460 |
| P <sup>t</sup> Bu <sub>3</sub>                                                         | -814.788          | 0                | -814.415            | -814.456  |
| Me <sub>3</sub> Si-P <sup>t</sup> Bu <sub>3</sub> <sup>+</sup>                         | -1223.898         | 0                | -1223.407           | -1223.454 |
| P( <i>p</i> -tol) <sub>3</sub>                                                         | -1154.024         | 0                | -1153.664           | -1153.716 |
| Me <sub>3</sub> Si-P( <i>p</i> -tol) <sub>3</sub> <sup>+</sup>                         | -1563.125         | 0                | -1562.650           | -1562.711 |
| PCy <sub>3</sub>                                                                       | -1047.016         | 0                | -1046.527           | -1046.573 |
| Me <sub>3</sub> Si-PCy <sub>3</sub> <sup>+</sup>                                       | -1456.121         | 0                | -1455.514           | -1455.567 |
| P( <i>o</i> -tol) <sub>3</sub>                                                         | -1154.008         | 0                | -1153.647           | -1153.695 |
| Me <sub>3</sub> Si-P( <i>o</i> -tol) <sub>3</sub> <sup>+</sup>                         | -1563.107         | 0                | -1562.630           | -1562.687 |
| PPh <sub>2</sub> ( <i>p</i> -tol)                                                      | -1075.404         | 0                | -1075.099           | -1075.147 |
| Me <sub>3</sub> Si-PPh <sub>2</sub> ( <i>p</i> -tol) <sup>+</sup>                      | -1484.502         | 0                | -1484.082           | -1484.138 |
| PPh <sub>2</sub> <i>i</i> -Pr                                                          | -923.027          | 0                | -922.746            | -922.790  |
| Me <sub>3</sub> Si-PPh <sub>2</sub> <i>i</i> -Pr <sup>+</sup>                          | -1332.126         | 0                | -1331.730           | -1331.780 |
| PPh <sub>2</sub> ( <i>o</i> -biphenyl)                                                 | -1267.086         | 0                | -1266.728           | -1266.781 |
| Me <sub>3</sub> Si-PPh <sub>2</sub> ( <i>o</i> -biphenyl) <sup>+</sup>                 | -1676.184         | 0                | -1675.709           | -1675.768 |
| P( <i>p</i> -F-Ph) <sub>3</sub>                                                        | -1333.739         | 0                | -1333.487           | -1333.537 |
| Me <sub>3</sub> Si-P( <i>p</i> -F-Ph) <sub>3</sub> <sup>+</sup>                        | -1742.832         | 0                | -1742.464           | -1742.522 |
| P(1-naphthyl) <sub>3</sub>                                                             | -1496.887         | 0                | -1496.468           | -1496.522 |
| Me <sub>3</sub> Si-P(1-naphthyl) <sub>3</sub> <sup>+</sup>                             | -1905.981         | 0                | -1905.445           | -1905.506 |
| PPh <sub>2</sub> (C <sub>6</sub> F <sub>5</sub> )                                      | -1532.126         | 0                | -1531.890           | -1531.941 |
| Me <sub>3</sub> Si-PPh <sub>2</sub> (C <sub>6</sub> F <sub>5</sub> ) <sup>+</sup>      | -1941.211         | 0                | -1940.860           | -1940.920 |
| P( <i>p</i> -CF <sub>3</sub> -Ph) <sub>3</sub>                                         | -2047.008         | 0                | -2046.717           | -2046.782 |
| Me <sub>3</sub> Si-P( <i>p</i> -CF <sub>3</sub> -Ph) <sub>3</sub> <sup>+</sup>         | -2456.093         | 0                | -2455.687           | -2455.760 |
| P( <sup>t</sup> Bu) <sub>2</sub> ( <i>o</i> -biphenyl)                                 | -1119.553         | 0                | -1119.131           | -1119.180 |
| Me <sub>3</sub> Si-P( <sup>t</sup> Bu) <sub>2</sub> ( <i>o</i> -biphenyl) <sup>+</sup> | -1528.639         | 0                | -1528.098           | -1528.152 |
| P(mesityl) <sub>3</sub>                                                                | -1389.863         | 0                | -1389.334           | -1389.394 |

|                                                                    |           |   |           |           |
|--------------------------------------------------------------------|-----------|---|-----------|-----------|
| Me <sub>3</sub> Si-P(mesityl) <sub>3</sub> <sup>+</sup>            | -1798.950 | 0 | -1798.302 | -1798.365 |
| Me <sub>2</sub> O                                                  | -154.991  | 0 | -154.910  | -154.936  |
| Me <sub>3</sub> Si-OMe <sub>2</sub> <sup>+</sup>                   | -564.072  | 0 | -563.875  | -563.913  |
| MeOEt                                                              | -194.301  | 0 | -194.192  | -194.220  |
| Me <sub>3</sub> Si-OMeEt <sup>+</sup>                              | -603.384  | 0 | -603.158  | -603.197  |
| MeO <i>i</i> Pr                                                    | -233.611  | 0 | -233.474  | -233.504  |
| Me <sub>3</sub> Si-OMe <i>i</i> Pr <sup>+</sup>                    | -642.692  | 0 | -642.439  | -642.478  |
| MeOtBu                                                             | -272.920  | 0 | -272.754  | -272.786  |
| Me <sub>3</sub> Si-OMe <i>t</i> Bu <sup>+</sup>                    | -681.999  | 0 | -681.716  | -681.755  |
| (MeOCH <sub>2</sub> ) <sub>2</sub>                                 | -308.788  | 0 | -308.645  | -308.677  |
| Me <sub>3</sub> Si-(MeOCH <sub>2</sub> ) <sub>2</sub> <sup>+</sup> | -717.866  | 0 | -717.608  | -717.650  |
| 1,2-epoxybutane                                                    | -232.373  | 0 | -232.258  | -232.286  |
| Me <sub>3</sub> Si-1,2-epoxybutane <sup>+</sup>                    | -641.457  | 0 | -641.226  | -641.265  |
| Anisole                                                            | -346.680  | 0 | -346.545  | -346.576  |
| Me <sub>3</sub> Si-anisole <sup>+</sup>                            | -755.752  | 0 | -755.503  | -755.544  |
| 2-pentanone                                                        | -271.727  | 0 | -271.584  | -271.617  |
| Me <sub>3</sub> Si-2-pentanone <sup>+</sup>                        | -680.812  | 0 | -680.554  | -680.596  |
| Cyclohexenone                                                      | -308.596  | 0 | -308.468  | -308.498  |
| Me <sub>3</sub> Si-cyclohexenone <sup>+</sup>                      | -717.687  | 0 | -717.444  | -717.484  |
| Cyclohexeneoxide                                                   | -309.786  | 0 | -309.633  | -309.622  |
| Me <sub>3</sub> Si-cyclohexeneoxide <sup>+</sup>                   | -718.873  | 0 | -718.606  | -718.646  |
| AsPh <sub>3</sub>                                                  | -2928.587 | 0 | -2928.311 | -2928.357 |
| Me <sub>3</sub> Si-AsPh <sub>3</sub> <sup>+</sup>                  | -3337.685 | 0 | -3337.293 | -3337.349 |
| Cyclohexanone                                                      | -309.828  | 0 | -309.676  | -309.706  |
| Me <sub>3</sub> Si-cyclohexanone <sup>+</sup>                      | -718.913  | 0 | -718.646  | -718.687  |
| Dabco                                                              | -345.260  | 0 | -345.074  | -345.105  |
| Me <sub>3</sub> Si-Dabco <sup>+</sup>                              | -754.373  | 0 | -754.070  | -754.109  |
| Cis-2,5-Me <sub>2</sub> -THF                                       | -311.025  | 0 | -310.851  | -310.883  |
| Me <sub>3</sub> Si-Cis-2,5-Me <sub>2</sub> -THF <sup>+</sup>       | -720.117  | 0 | -719.827  | -719.867  |
| trans-2,5-Me <sub>2</sub> -THF                                     | -311.025  | 0 | -310.851  | -310.883  |
| Me <sub>3</sub> Si-trans-2,5-Me <sub>2</sub> -THF <sup>+</sup>     | -720.111  | 0 | -719.821  | -719.862  |
| Dioxane                                                            | -307.591  | 0 | -307.467  | -307.496  |
| Me <sub>3</sub> Si-dioxane <sup>+</sup>                            | -716.671  | 0 | -716.432  | -716.470  |
| 3-penten-2-one                                                     | -270.493  | 0 | -270.375  | -270.408  |
| Me <sub>3</sub> Si-3-penten-2one <sup>+</sup>                      | -679.583  | 0 | -679.350  | -679.392  |
| Methylbutyrate                                                     | -346.939  | 0 | -346.790  | -346.824  |
| Me <sub>3</sub> Si-methylbutyrate <sup>+</sup>                     | -756.022  | 0 | -755.758  | -755.801  |
| Et <sub>2</sub> O                                                  | -233.612  | 0 | -233.475  | -233.504  |
| Me <sub>3</sub> Si-OEt <sub>2</sub> <sup>+</sup>                   | -642.695  | 0 | -642.441  | -642.481  |
| EtOH                                                               | -155.011  | 0 | -154.931  | -154.956  |
| Me <sub>3</sub> Si-ethanol <sup>+</sup>                            | -564.093  | 0 | -563.897  | -563.935  |
| Hexylmethylether                                                   | -351.525  | 0 | -351.302  | -351.339  |

|                                                                    |           |   |           |           |
|--------------------------------------------------------------------|-----------|---|-----------|-----------|
| Me <sub>3</sub> Si–hexylmethylether <sup>+</sup>                   | -760.609  | 0 | -760.268  | -760.314  |
| H-PPh <sub>3</sub> <sup>+</sup>                                    | -1036.527 | 0 | -1036.239 | -1036.286 |
| Imine                                                              | -657.118  | 0 | -656.914  | -656.954  |
| iPrCOOH                                                            | -307.645  | 0 | -307.525  | -307.556  |
| Me <sub>3</sub> Si–iPrCOOH <sup>+</sup>                            | -716.730  | 0 | -716.495  | -716.537  |
| iPrCOO–SiMe <sub>3</sub>                                           | -716.322  | 0 | -716.100  | -716.142  |
| Lutidine                                                           | -326.841  | 0 | -326.696  | -326.728  |
| Me <sub>3</sub> Si–lutidine <sup>+</sup>                           | -735.931  | 0 | -735.667  | -735.707  |
| Methylcrotonate                                                    | -345.705  | 0 | -345.850  | -345.613  |
| Me <sub>3</sub> Si–methylcrotonate <sup>+</sup>                    | -754.790  | 0 | -754.551  | -754.596  |
| Methyl-(E)-3-(oxiran-2-yl)acrylate                                 | -458.957  | 0 | -458.821  | -458.856  |
| Me <sub>3</sub> Si–Methyl-(E)-3-(oxiran-2-yl)acrylate <sup>+</sup> | -868.039  | 0 | -867.788  | -867.834  |
| MeOSiMe <sub>3</sub>                                               | -524.371  | 0 | -524.217  | -524.251  |
| Me <sub>3</sub> Si–MeOSiMe <sub>3</sub> <sup>+</sup>               | -933.458  | 0 | -933.187  | -933.230  |
| EtOSiMe <sub>3</sub>                                               | -563.682  | 0 | -563.498  | -563.535  |
| Me <sub>3</sub> Si–EtOSiMe <sub>3</sub> <sup>+</sup>               | -972.770  | 0 | -972.470  | -972.514  |
| N-Me-acetamide                                                     | -248.476  | 0 | -248.373  | -248.403  |
| Me <sub>3</sub> Si–N-Me-acetamide <sup>+</sup>                     | -657.574  | 0 | -657.355  | -675.396  |
| N-Me-piperidine                                                    | -291.153  | 0 | -290.964  | -290.995  |
| Me <sub>3</sub> Si–N-Me-piperidine <sup>+</sup>                    | -700.265  | 0 | -699.959  | -699.998  |
| N,N-dimethylaniline                                                | -366.123  | 0 | -365.947  | -365.981  |
| Me <sub>3</sub> Si–N,N,-dimethylaniline <sup>+</sup>               | -775.217  | 0 | -774.925  | -774.966  |
| THF                                                                | -232.400  | 0 | -232.282  | -232.311  |
| Me <sub>3</sub> Si–THF <sup>+</sup>                                | -641.490  | 0 | -641.257  | -641.296  |
| Tetrahydropyran                                                    | -271.713  | 0 | -271.566  | -271.594  |
| Me <sub>3</sub> Si–tetrahydropyran <sup>+</sup>                    | -680.800  | 0 | -680.536  | -680.575  |
| Tetrahydrothiophene                                                | -555.388  | 0 | -555.274  | -555.302  |
| Me <sub>3</sub> Si–tetrahydrothiophene <sup>+</sup>                | -964.471  | 0 | -964.241  | -964.279  |
| 4H-chromene                                                        | -422.862  | 0 | -422.714  | -422.747  |
| Me <sub>3</sub> Si–4H-chromene <sup>+</sup>                        | -831.925  | 0 | -831.663  | -831.704  |
| Chroman                                                            | -424.096  | 0 | -423.925  | -423.957  |
| Me <sub>3</sub> Si–chroman <sup>+</sup>                            | -833.168  | 0 | -832.881  | -832.923  |
| Isochroman                                                         | -424.089  | 0 | -423.918  | -423.950  |
| Me <sub>3</sub> Si–isochroman <sup>+</sup>                         | -833.172  | 0 | -832.885  | -832.927  |
| N,N-dimethylacetamide                                              | -287.770  | 0 | -287.638  | -287.669  |
| Me <sub>3</sub> Si–N,N-dimethylacetamide <sup>+</sup>              | -696.873  | 0 | -696.626  | -696.669  |
| N-acetyl-pyrrolidine                                               | -365.181  | 0 | -365.012  | -365.044  |
| Me <sub>3</sub> Si–N-acetyl-pyrrolidine <sup>+</sup>               | -774.287  | 0 | -774.001  | -774.044  |
| Benzaldehyde                                                       | -345.480  | 0 | -345.369  | -345.399  |
| Me <sub>3</sub> Si–Benzaldehyde <sup>+</sup>                       | -754.564  | 0 | -754.338  | -754.380  |

|                                                             |           |   |           |           |
|-------------------------------------------------------------|-----------|---|-----------|-----------|
| Benzaldehyde dimethylacetal                                 | -500.480  | 0 | -500.285  | -500.323  |
| Me <sub>3</sub> Si–Benzaldehyde dimethylacetal <sup>+</sup> | -909.563  | 0 | -909.252  | -909.299  |
| Isosorbide                                                  | -1352.743 | 0 | -1352.372 | -1352.429 |
| Me <sub>3</sub> Si–isosorbide <sup>+</sup> Isomer1          | -1761.832 | 0 | -1761.344 | -1761.406 |
| Me <sub>3</sub> Si–isosorbide <sup>+</sup> Isomer2          | -1761.833 | 0 | -1761.345 | -1761.410 |
| Isomannide                                                  | -1761.832 | 0 | -1761.343 | -1761.404 |
| Me <sub>3</sub> Si–isomannide <sup>+</sup>                  | -1352.741 | 0 | -1352.368 | -1352.420 |
| Alpha-Me-glucose                                            | -2361.018 | 0 | -2360.382 | -2360.462 |
| Me <sub>3</sub> Si–Alpha-Me-glucose <sup>+</sup>            | -2270.102 | 0 | -2769.350 | -2769.434 |
| Beta-Me-glucose                                             | -2361.017 | 0 | -2360.380 | -2360.456 |
| Me <sub>3</sub> Si–Beta-Me-glucose <sup>+</sup>             | -2770.107 | 0 | -2769.354 | -2769.438 |
| Glucose-oxocarbenium <sup>+</sup>                           | -2245.700 | 0 | -2245.108 | -2245.184 |
| Me <sub>3</sub> Si <sup>+</sup>                             | -409.015  | 0 | -408.904  | -408.935  |

#### 4. Optimized Coordinates and Gibbs free energies

47

Me<sub>3</sub>Si–PPh<sub>3</sub><sup>+</sup>. Gibbs free energy: -1444.851922

|   |             |             |             |
|---|-------------|-------------|-------------|
| P | -0.00050700 | 0.00965100  | 0.17536700  |
| C | 1.58420200  | 0.60322300  | -0.47449900 |
| C | 1.62732200  | 1.52091700  | -1.52798000 |
| C | 2.77434700  | 0.10698100  | 0.07264700  |
| C | 2.85776600  | 1.93876300  | -2.02955700 |
| H | 0.71084900  | 1.91095500  | -1.95841000 |
| C | 3.99877600  | 0.52622900  | -0.43564600 |
| H | 2.75569800  | -0.61399200 | 0.88437700  |
| C | 4.04064000  | 1.44289000  | -1.48603300 |
| H | 2.88852500  | 2.65257900  | -2.84557000 |
| H | 4.91758800  | 0.13702600  | -0.01077000 |
| H | 4.99654600  | 1.77109400  | -1.88056400 |
| C | -1.30921000 | 1.08433800  | -0.47158800 |
| C | -1.43856100 | 2.37676800  | 0.05292600  |
| C | -2.16662200 | 0.65082500  | -1.48647000 |
| C | -2.42279700 | 3.22823300  | -0.43559100 |
| H | -0.76899600 | 2.73008000  | 0.83146200  |
| C | -3.15200100 | 1.50921400  | -1.96960300 |
| H | -2.06894700 | -0.34622500 | -1.90297100 |
| C | -3.28181500 | 2.79294500  | -1.44490000 |
| H | -2.52084700 | 4.22756700  | -0.02580700 |
| H | -3.81805200 | 1.17111800  | -2.75603300 |
| H | -4.05173100 | 3.45766700  | -1.82235900 |
| C | -0.27571900 | -1.66806000 | -0.45540700 |
| C | 0.59956500  | -2.24067100 | -1.38169900 |
| C | -1.38338300 | -2.39253800 | 0.00443500  |
| C | 0.36636300  | -3.53420800 | -1.84364000 |

|    |             |             |             |
|----|-------------|-------------|-------------|
| H  | 1.45910100  | -1.68774300 | -1.74531000 |
| C  | -1.61142400 | -3.68139000 | -0.46403700 |
| H  | -2.07754200 | -1.95536000 | 0.71604700  |
| C  | -0.73498500 | -4.25335900 | -1.38665600 |
| H  | 1.04802500  | -3.97592300 | -2.56240700 |
| H  | -2.47164600 | -4.23753600 | -0.10777500 |
| H  | -0.91252700 | -5.26043300 | -1.74903300 |
| Si | -0.01181200 | 0.00755900  | 2.50877900  |
| C  | 0.72018300  | -1.64059800 | 2.99706800  |
| H  | 0.62490100  | -1.74745900 | 4.08323300  |
| H  | 0.18971300  | -2.47404900 | 2.52807700  |
| H  | 1.78155300  | -1.71770900 | 2.74585600  |
| C  | -1.80892000 | 0.18772300  | 2.98800400  |
| H  | -1.86310400 | 0.28355800  | 4.07811300  |
| H  | -2.25866200 | 1.08224600  | 2.54844700  |
| H  | -2.40626800 | -0.68145400 | 2.69956300  |
| C  | 1.03328700  | 1.46804400  | 3.02524600  |
| H  | 1.16759100  | 1.42138200  | 4.11165000  |
| H  | 2.02327600  | 1.44974600  | 2.56187000  |
| H  | 0.55450400  | 2.42226600  | 2.78942300  |

34

PPh<sub>3</sub>. Gibbs free energy: -1035.86317

|   |             |             |             |
|---|-------------|-------------|-------------|
| P | -0.05237900 | -0.04147700 | -1.25474200 |
| C | 0.56823600  | 1.51906600  | -0.49374000 |
| C | 1.43682000  | 1.56641700  | 0.60205500  |
| C | 0.13004700  | 2.72402400  | -1.05946400 |
| C | 1.85230500  | 2.79108000  | 1.12417700  |
| H | 1.79208900  | 0.64557000  | 1.05446200  |
| C | 0.53332900  | 3.94768100  | -0.53013400 |
| H | -0.53616900 | 2.70659800  | -1.91867700 |
| C | 1.39850200  | 3.98347700  | 0.56333300  |
| H | 2.52898700  | 2.81111300  | 1.97301300  |
| H | 0.17868200  | 4.87144800  | -0.97653700 |
| H | 1.72093300  | 4.93552100  | 0.97321700  |
| C | 1.02104200  | -1.30351600 | -0.44798700 |
| C | 2.26784200  | -1.54664200 | -1.04014900 |
| C | 0.67140700  | -2.01846300 | 0.70265800  |
| C | 3.15430700  | -2.46545400 | -0.48409300 |
| H | 2.55061500  | -1.00987900 | -1.94251900 |
| C | 1.55288300  | -2.94942900 | 1.25232200  |
| H | -0.29055500 | -1.85036100 | 1.17731200  |
| C | 2.79665800  | -3.17170600 | 0.66431500  |
| H | 4.11898500  | -2.63576600 | -0.95176500 |
| H | 1.26704500  | -3.49704500 | 2.14521900  |
| H | 3.48254200  | -3.89454400 | 1.09498000  |
| C | -1.65577500 | -0.27661500 | -0.37729700 |
| C | -2.02182800 | 0.41934800  | 0.78013700  |
| C | -2.55226100 | -1.20943100 | -0.91549000 |

|   |             |             |             |
|---|-------------|-------------|-------------|
| C | -3.25415400 | 0.18426000  | 1.38814700  |
| H | -1.34362700 | 1.14883400  | 1.21216600  |
| C | -3.77866600 | -1.45456200 | -0.30148700 |
| H | -2.29020400 | -1.74886700 | -1.82246800 |
| C | -4.13343100 | -0.75472200 | 0.85148700  |
| H | -3.52479700 | 0.73355600  | 2.28469100  |
| H | -4.46052300 | -2.18349900 | -0.72834400 |
| H | -5.09263400 | -0.93646800 | 1.32598900  |

16

2-Me-THF. Gibbs free energy: -271.596066

|   |             |             |             |
|---|-------------|-------------|-------------|
| C | 1.35061200  | -0.83310900 | -0.20690500 |
| O | -0.01015200 | -1.13983400 | 0.11512900  |
| C | -0.74117200 | 0.06260800  | 0.40649100  |
| C | 0.12452400  | 1.19690900  | -0.14022000 |
| C | 1.53712300  | 0.65665500  | 0.08563200  |
| H | 2.00829400  | -1.47313000 | 0.38914000  |
| H | 1.51934400  | -1.05228200 | -1.26902300 |
| H | -0.81807000 | 0.15902300  | 1.50062800  |
| H | -0.06993500 | 1.33353200  | -1.21094900 |
| H | -0.06638700 | 2.14499800  | 0.36828900  |
| H | 2.28813600  | 1.11576400  | -0.56126500 |
| H | 1.84044300  | 0.80955700  | 1.12653100  |
| C | -2.13287400 | -0.03881900 | -0.18761700 |
| H | -2.66723600 | -0.90129100 | 0.22060100  |
| H | -2.70793500 | 0.86284000  | 0.04633900  |
| H | -2.07471400 | -0.14579700 | -1.27560500 |

29

Me<sub>3</sub>Si-2-Me-THF<sup>+</sup>. Gibbs free energy: -680.579885

|    |             |             |             |
|----|-------------|-------------|-------------|
| C  | 1.05464100  | -1.43260900 | -0.55170300 |
| O  | 0.36055000  | -0.23151500 | -0.04403400 |
| C  | 1.35391900  | 0.81085500  | 0.40304100  |
| C  | 2.69595100  | 0.12639300  | 0.16467000  |
| C  | 2.38665700  | -1.36990300 | 0.16128400  |
| H  | 0.44274100  | -2.29447000 | -0.29629800 |
| H  | 1.13795100  | -1.32148500 | -1.63439300 |
| H  | 1.14713800  | 0.93754500  | 1.46712500  |
| H  | 3.10144200  | 0.43406100  | -0.80412000 |
| H  | 3.40933500  | 0.40926500  | 0.93987500  |
| H  | 3.14379800  | -1.95244800 | -0.36542100 |
| H  | 2.28814400  | -1.75808600 | 1.17826600  |
| C  | 1.15675800  | 2.09214500  | -0.37264100 |
| H  | 0.20062100  | 2.57391200  | -0.16101000 |
| H  | 1.94741100  | 2.78741100  | -0.07700500 |
| H  | 1.24284400  | 1.91034600  | -1.44703900 |
| Si | -1.44609900 | -0.05000700 | 0.04132200  |
| C  | -1.93485600 | 0.73178100  | -1.57041800 |
| H  | -3.02771600 | 0.77871600  | -1.62894800 |
| H  | -1.54678900 | 1.74798900  | -1.67434300 |



|   |             |             |             |
|---|-------------|-------------|-------------|
| H | -1.57870200 | 0.13316300  | -2.41431400 |
| C | -2.07394100 | -1.78672300 | 0.24151600  |
| H | -1.61731900 | -2.29172600 | 1.09767500  |
| H | -3.15190700 | -1.72516000 | 0.42941700  |
| H | -1.93251800 | -2.39409800 | -0.65645700 |
| C | -1.71430700 | 0.99114500  | 1.55669000  |
| H | -1.31700000 | 2.00491300  | 1.46608700  |
| H | -2.79488700 | 1.07606200  | 1.71667600  |
| H | -1.28252300 | 0.51780800  | 2.44334800  |

50

Me<sub>2</sub>EtSi–PPh<sub>3</sub><sup>+</sup>. Gibbs free energy: -1484.128609

|    |             |             |             |
|----|-------------|-------------|-------------|
| P  | -0.00440300 | -0.00789300 | 0.17802000  |
| C  | 1.57869600  | 0.59329600  | -0.46948300 |
| C  | 1.62068700  | 1.54467200  | -1.49237300 |
| C  | 2.76945700  | 0.07330400  | 0.05427700  |
| C  | 2.85064900  | 1.97263900  | -1.98700100 |
| H  | 0.70405600  | 1.95307600  | -1.90513400 |
| C  | 3.99303200  | 0.50296500  | -0.44685000 |
| H  | 2.75179600  | -0.67350500 | 0.84245100  |
| C  | 4.03391800  | 1.45370100  | -1.46666200 |
| H  | 2.88054400  | 2.71223200  | -2.77969400 |
| H  | 4.91208900  | 0.09573800  | -0.03975500 |
| H  | 4.98929200  | 1.79020400  | -1.85545700 |
| C  | -1.31873900 | 1.06407600  | -0.46160200 |
| C  | -1.48331900 | 2.33856600  | 0.09522500  |
| C  | -2.14321500 | 0.64631300  | -1.51029600 |
| C  | -2.46827700 | 3.18827700  | -0.39496500 |
| H  | -0.84264300 | 2.67929100  | 0.90286100  |
| C  | -3.12955600 | 1.50245600  | -1.99496800 |
| H  | -2.01969800 | -0.33750800 | -1.95080900 |
| C  | -3.29325400 | 2.76903700  | -1.43864100 |
| H  | -2.59295600 | 4.17373000  | 0.04032000  |
| H  | -3.76961800 | 1.17631500  | -2.80760200 |
| H  | -4.06366800 | 3.43230900  | -1.81760900 |
| C  | -0.27740300 | -1.68192600 | -0.46329700 |
| C  | 0.59392800  | -2.24532600 | -1.39880900 |
| C  | -1.38378700 | -2.41017800 | -0.00645600 |
| C  | 0.35837000  | -3.53399200 | -1.87298300 |
| H  | 1.45182300  | -1.68879500 | -1.76073900 |
| C  | -1.61417500 | -3.69411200 | -0.48720600 |
| H  | -2.07529900 | -1.97944300 | 0.71172700  |
| C  | -0.74163000 | -4.25710500 | -1.41907500 |
| H  | 1.03686600  | -3.96847600 | -2.59911400 |
| H  | -2.47338800 | -4.25349700 | -0.13357400 |
| H  | -0.92133700 | -5.26012700 | -1.79147300 |
| Si | 0.00438600  | -0.01514100 | 2.50942700  |
| C  | 0.72513800  | -1.67006000 | 2.99614100  |
| H  | 0.61942500  | -1.78758700 | 4.08011700  |

|   |             |             |            |
|---|-------------|-------------|------------|
| H | 0.19530200  | -2.49800200 | 2.51661600 |
| H | 1.78836200  | -1.74910600 | 2.75288500 |
| C | -1.78530300 | 0.17355600  | 3.01580300 |
| H | -1.82796200 | 0.24415500  | 4.10832700 |
| H | -2.23489500 | 1.07959900  | 2.60085300 |
| H | -2.39190300 | -0.68546800 | 2.71618000 |
| C | 1.07868000  | 1.44023500  | 3.01313400 |
| H | 2.07019100  | 1.32506400  | 2.56120700 |
| H | 0.66141100  | 2.36873000  | 2.60682700 |
| C | 1.20784100  | 1.55203700  | 4.54264400 |
| H | 1.65868600  | 0.65334700  | 4.97483400 |
| H | 1.84278000  | 2.40080000  | 4.81180800 |
| H | 0.23505800  | 1.70329100  | 5.02042500 |

32

Me<sub>2</sub>EtSi-2-Me-THF<sup>+</sup>. Gibbs free energy: -719.854163

|    |             |             |             |
|----|-------------|-------------|-------------|
| C  | 1.09638300  | -1.40691800 | -0.74308500 |
| O  | 0.62423200  | -0.06939100 | -0.31595800 |
| C  | 1.79157500  | 0.75208100  | 0.18335200  |
| C  | 2.97330700  | -0.20404100 | 0.05176400  |
| C  | 2.35707500  | -1.60235200 | 0.06678300  |
| H  | 0.30267500  | -2.12380400 | -0.53787900 |
| H  | 1.27491600  | -1.33878900 | -1.81677500 |
| H  | 1.56275400  | 0.95713200  | 1.23156100  |
| H  | 3.48931900  | -0.02604400 | -0.89656100 |
| H  | 3.68373500  | -0.04521500 | 0.86422300  |
| H  | 3.00710500  | -2.35311800 | -0.38464700 |
| H  | 2.11042400  | -1.91636700 | 1.08494700  |
| C  | 1.89617000  | 2.01336000  | -0.63843100 |
| H  | 1.03448400  | 2.66832600  | -0.50768600 |
| H  | 2.78789800  | 2.55639400  | -0.31206900 |
| H  | 2.00981900  | 1.76999300  | -1.69775700 |
| Si | -1.06983100 | 0.09444500  | 0.33362500  |
| C  | -1.29473100 | 1.90110200  | 0.69616700  |
| H  | -2.27534000 | 2.01540100  | 1.17220300  |
| H  | -0.55037300 | 2.29433900  | 1.39384300  |
| H  | -1.29541700 | 2.50535400  | -0.21478600 |
| C  | -2.12072100 | -0.51990300 | -1.07821000 |
| H  | -1.94028800 | -1.58787600 | -1.24381300 |
| H  | -1.80888600 | -0.00079500 | -1.99214700 |
| C  | -1.08802500 | -0.97111000 | 1.85750200  |
| H  | -0.34647900 | -0.63518200 | 2.58854800  |
| H  | -2.07460300 | -0.89720900 | 2.32785400  |
| H  | -0.90631500 | -2.02589600 | 1.63255500  |
| C  | -3.62063500 | -0.28146600 | -0.82110700 |
| H  | -4.21526100 | -0.65128700 | -1.66044800 |
| H  | -3.96466600 | -0.79998200 | 0.07935500  |
| H  | -3.84411300 | 0.78299100  | -0.70201300 |

56

Et<sub>3</sub>Si-PPh<sub>3</sub><sup>+</sup>. Gibbs free energy: -1562.674398

|    |             |             |             |
|----|-------------|-------------|-------------|
| P  | 0.02187900  | -0.14425800 | 0.17781400  |
| C  | 1.55827700  | 0.56406300  | -0.47625400 |
| C  | 1.53207000  | 1.57039800  | -1.44497500 |
| C  | 2.78302400  | 0.07441800  | -0.00437800 |
| C  | 2.72995500  | 2.08393600  | -1.93766000 |
| H  | 0.58853000  | 1.95567800  | -1.81745000 |
| C  | 3.97405900  | 0.58926400  | -0.50325700 |
| H  | 2.81560400  | -0.71378200 | 0.74239000  |
| C  | 3.94721700  | 1.59588100  | -1.46862700 |
| H  | 2.70825900  | 2.86523100  | -2.68956500 |
| H  | 4.91985000  | 0.20568600  | -0.13631400 |
| H  | 4.87685300  | 2.00001600  | -1.85535800 |
| C  | -1.36158300 | 0.88582100  | -0.38729500 |
| C  | -1.58530700 | 2.12112000  | 0.23338700  |
| C  | -2.18978200 | 0.47048000  | -1.43444900 |
| C  | -2.63504900 | 2.93013200  | -0.18623500 |
| H  | -0.94059000 | 2.46463900  | 1.03583700  |
| C  | -3.24128400 | 1.28483400  | -1.84799800 |
| H  | -2.02241600 | -0.48167300 | -1.92625800 |
| C  | -3.46606200 | 2.51006700  | -1.22443700 |
| H  | -2.80331900 | 3.88564900  | 0.29827000  |
| H  | -3.88426800 | 0.95833500  | -2.65816500 |
| H  | -4.28788800 | 3.14021800  | -1.54783300 |
| C  | -0.18233700 | -1.79178500 | -0.56011200 |
| C  | 0.74820600  | -2.28359800 | -1.47926400 |
| C  | -1.29120100 | -2.56966900 | -0.20486700 |
| C  | 0.56999500  | -3.54926900 | -2.03439500 |
| H  | 1.60826000  | -1.68997900 | -1.76903000 |
| C  | -1.46563300 | -3.82840800 | -0.76633100 |
| H  | -2.02201300 | -2.20161100 | 0.50655700  |
| C  | -0.53308400 | -4.32104200 | -1.67944200 |
| H  | 1.29505100  | -3.92628300 | -2.74753800 |
| H  | -2.32730300 | -4.42505100 | -0.48716000 |
| H  | -0.66908400 | -5.30517500 | -2.11535400 |
| Si | 0.12371500  | -0.11979300 | 2.51870900  |
| C  | 0.98949300  | -1.67281500 | 3.12949600  |
| H  | 0.92726400  | -1.57342500 | 4.22285000  |
| C  | -1.62505200 | 0.13607500  | 3.16418300  |
| H  | -1.52957200 | -0.01528200 | 4.24837200  |
| H  | -1.86258200 | 1.19884500  | 3.03522600  |
| C  | 1.18395900  | 1.38692800  | 2.90974300  |
| H  | 2.17523500  | 1.25738100  | 2.46172400  |
| H  | 0.75456000  | 2.28273100  | 2.44700800  |
| C  | 1.31941900  | 1.60685300  | 4.42748900  |
| H  | 1.79590900  | 0.75236000  | 4.91775300  |
| H  | 1.93422400  | 2.48781000  | 4.63232100  |
| H  | 0.34641600  | 1.76715300  | 4.90213900  |

|   |             |             |            |
|---|-------------|-------------|------------|
| C | -2.77825700 | -0.71868700 | 2.62719500 |
| H | -2.97052500 | -0.51007300 | 1.56957200 |
| H | -2.58450800 | -1.78933900 | 2.74066800 |
| H | -3.70203800 | -0.49639000 | 3.16844000 |
| H | 2.05644100  | -1.57552600 | 2.89383700 |
| C | 0.48119200  | -3.05827000 | 2.71232600 |
| H | -0.59090000 | -3.17578700 | 2.89583200 |
| H | 0.66039300  | -3.24724300 | 1.65146200 |
| H | 0.99866000  | -3.83749200 | 3.27919900 |

38

Et<sub>3</sub>Si-2-Me-THF<sup>+</sup>. Gibbs free energy: -798.403282

|    |             |             |             |
|----|-------------|-------------|-------------|
| C  | 1.40659900  | -0.84168000 | -1.43603700 |
| O  | 0.77516800  | 0.10579100  | -0.48864700 |
| C  | 1.84018300  | 0.81273500  | 0.32008200  |
| C  | 3.13648400  | 0.18941500  | -0.19001100 |
| C  | 2.73017800  | -1.15936800 | -0.78012600 |
| H  | 0.73847100  | -1.69376900 | -1.54931800 |
| H  | 1.50672500  | -0.31074500 | -2.38337500 |
| H  | 1.63951300  | 0.53056900  | 1.35548600  |
| H  | 3.57180600  | 0.82820700  | -0.96444600 |
| H  | 3.85843100  | 0.09661800  | 0.62271100  |
| H  | 3.45208000  | -1.53287900 | -1.50776100 |
| H  | 2.59910000  | -1.91512300 | -0.00070100 |
| C  | 1.73482100  | 2.30275000  | 0.10542700  |
| H  | 0.83006000  | 2.72713300  | 0.53988700  |
| H  | 2.59400600  | 2.77369100  | 0.59172400  |
| H  | 1.77197800  | 2.53781100  | -0.96146700 |
| Si | -0.92344000 | -0.24624600 | 0.08666400  |
| C  | -1.42041700 | 1.19012300  | 1.17058500  |
| H  | -2.21262000 | 0.78994300  | 1.81833200  |
| H  | -0.60866600 | 1.45456200  | 1.85784000  |
| C  | -1.89704600 | -0.34287100 | -1.50148600 |
| H  | -1.46801600 | -1.09320600 | -2.17403300 |
| H  | -1.81212100 | 0.62205300  | -2.01523200 |
| C  | -0.78907900 | -1.86368500 | 1.00788400  |
| H  | -1.82015200 | -2.12406900 | 1.28405800  |
| H  | -0.46502000 | -2.65342300 | 0.31942900  |
| C  | -3.37793600 | -0.67625600 | -1.23686500 |
| H  | -3.94150900 | -0.67799100 | -2.17345800 |
| H  | -3.49221300 | -1.66430300 | -0.78099400 |
| H  | -3.85005500 | 0.05374200  | -0.57148600 |
| C  | 0.09552600  | -1.84926100 | 2.26396400  |
| H  | 0.03579800  | -2.80685000 | 2.78790800  |
| H  | 1.14855600  | -1.68327800 | 2.01643400  |
| H  | -0.21079800 | -1.06896500 | 2.96760200  |
| C  | -1.94150000 | 2.43063800  | 0.42704100  |
| H  | -2.85699900 | 2.20432300  | -0.12667000 |
| H  | -2.17325400 | 3.23219300  | 1.13323700  |

H -1.21515800 2.81964200 -0.29258000

54

Me<sub>2</sub>PhSi-PPh<sub>3</sub><sup>+</sup>. Gibbs free energy: -1636.48249

|    |             |             |             |
|----|-------------|-------------|-------------|
| P  | -0.06537800 | -0.04757600 | 0.20344100  |
| C  | 1.56675200  | 0.53331000  | -0.33639500 |
| C  | 1.74058300  | 1.79463700  | -0.90853100 |
| C  | 2.67851200  | -0.27734900 | -0.06993000 |
| C  | 3.02481300  | 2.24659400  | -1.20509200 |
| H  | 0.88690900  | 2.42800600  | -1.12436100 |
| C  | 3.95641800  | 0.18106000  | -0.36759100 |
| H  | 2.55175000  | -1.26598900 | 0.36179800  |
| C  | 4.13039200  | 1.44611300  | -0.92988900 |
| H  | 3.15747000  | 3.22633800  | -1.65105200 |
| H  | 4.81484700  | -0.44826300 | -0.15920100 |
| H  | 5.12894800  | 1.80472400  | -1.15652800 |
| C  | -1.35456100 | 1.03334300  | -0.47342800 |
| C  | -1.51460800 | 2.32311000  | 0.05087600  |
| C  | -2.19762600 | 0.58349200  | -1.49467000 |
| C  | -2.50880800 | 3.15657800  | -0.44979000 |
| H  | -0.86474400 | 2.68658600  | 0.84066800  |
| C  | -3.19179500 | 1.42463200  | -1.98880500 |
| H  | -2.08586600 | -0.41455000 | -1.90517300 |
| C  | -3.34899100 | 2.70720400  | -1.46768400 |
| H  | -2.62774700 | 4.15385700  | -0.04029900 |
| H  | -3.84575900 | 1.07315200  | -2.77953100 |
| H  | -4.12655500 | 3.35784500  | -1.85391300 |
| C  | -0.30286300 | -1.71243400 | -0.46879900 |
| C  | 0.33918800  | -2.09120900 | -1.65341400 |
| C  | -1.16893200 | -2.60416000 | 0.17370000  |
| C  | 0.11792200  | -3.35816100 | -2.18436000 |
| H  | 1.00847100  | -1.40524900 | -2.16219200 |
| C  | -1.38591400 | -3.86938300 | -0.36329400 |
| H  | -1.68358600 | -2.32039900 | 1.08554100  |
| C  | -0.74102800 | -4.24679800 | -1.53980800 |
| H  | 0.61762800  | -3.64918700 | -3.10186400 |
| H  | -2.05544100 | -4.55826700 | 0.13993200  |
| H  | -0.90803500 | -5.23469900 | -1.95588300 |
| Si | -0.08437900 | 0.01189900  | 2.53561500  |
| C  | 0.99917400  | -1.41519500 | 3.05629700  |
| H  | 0.92341900  | -1.52534300 | 4.14319600  |
| H  | 0.68381100  | -2.35555700 | 2.59532300  |
| H  | 2.05009600  | -1.23982400 | 2.81018200  |
| C  | -1.87098800 | -0.11231500 | 3.06051500  |
| H  | -1.93996300 | 0.11509000  | 4.12972400  |
| H  | -2.50678700 | 0.59418600  | 2.51905200  |
| H  | -2.27078800 | -1.11864800 | 2.91184900  |
| C  | 0.65575500  | 1.68498600  | 2.91863900  |
| C  | 2.02523600  | 1.93135300  | 2.72774100  |

|   |             |            |            |
|---|-------------|------------|------------|
| C | -0.14932500 | 2.73650900 | 3.38596600 |
| C | 2.56934900  | 3.18767100 | 2.98010800 |
| H | 2.68194200  | 1.14263900 | 2.37079900 |
| C | 0.39263200  | 3.99447100 | 3.64128500 |
| H | -1.21236400 | 2.58167000 | 3.54990200 |
| C | 1.75188400  | 4.22228500 | 3.43336100 |
| H | 3.62902200  | 3.35883400 | 2.82056300 |
| H | -0.24657600 | 4.79478600 | 4.00004100 |
| H | 2.17500600  | 5.20293300 | 3.62641900 |

36

Me<sub>2</sub>PhSi-2-Me-THF<sup>+</sup>. Gibbs free energy: -872.208859

|    |             |             |             |
|----|-------------|-------------|-------------|
| C  | 0.89712800  | -1.49114200 | -0.81904200 |
| O  | 1.24648600  | -0.24092200 | -0.10963900 |
| C  | 2.65254000  | -0.30596800 | 0.42939400  |
| C  | 3.10969000  | -1.70110300 | 0.01575700  |
| C  | 1.82260200  | -2.50100200 | -0.17973200 |
| H  | -0.16327500 | -1.66726700 | -0.65334500 |
| H  | 1.10184200  | -1.32495100 | -1.87831200 |
| H  | 2.52770600  | -0.22365500 | 1.51053600  |
| H  | 3.66722900  | -1.64258600 | -0.92416400 |
| H  | 3.76397700  | -2.12772800 | 0.77739400  |
| H  | 1.96360000  | -3.36985600 | -0.82407400 |
| H  | 1.41259900  | -2.83537400 | 0.77692600  |
| C  | 3.48348400  | 0.82171900  | -0.13671700 |
| H  | 3.15388900  | 1.80356300  | 0.20775400  |
| H  | 4.51348100  | 0.68251200  | 0.20337400  |
| H  | 3.47524500  | 0.79690100  | -1.22958600 |
| Si | 0.11276800  | 1.16732000  | 0.09467700  |
| C  | 0.43343500  | 2.26202900  | -1.36870600 |
| H  | -0.32444100 | 3.05121400  | -1.40845900 |
| H  | 1.41456300  | 2.73860000  | -1.29879500 |
| H  | 0.38974100  | 1.69977600  | -2.30623800 |
| C  | 0.57214300  | 1.85920700  | 1.75514800  |
| H  | 1.55907000  | 2.32783700  | 1.76236200  |
| H  | -0.16220300 | 2.63001700  | 2.01200800  |
| H  | 0.54065800  | 1.09567300  | 2.53753100  |
| C  | -1.56147100 | 0.36407500  | 0.06981400  |
| C  | -2.05515500 | -0.29389400 | 1.20864400  |
| C  | -2.35936600 | 0.39174700  | -1.08491800 |
| C  | -3.30298200 | -0.91093800 | 1.19131900  |
| H  | -1.46504400 | -0.33052100 | 2.12052800  |
| C  | -3.60864500 | -0.22449500 | -1.10467200 |
| H  | -2.00783800 | 0.89432600  | -1.98186700 |
| C  | -4.07941500 | -0.87772400 | 0.03307200  |
| H  | -3.67081200 | -1.41458100 | 2.07932700  |
| H  | -4.21248400 | -0.19505200 | -2.00586800 |
| H  | -5.05206800 | -1.35901300 | 0.01843500  |

68

Ph<sub>3</sub>Si–PPh<sub>3</sub><sup>+</sup>. Gibbs free energy: -2019.740903

|    |             |             |             |
|----|-------------|-------------|-------------|
| P  | 0.05716200  | -0.04158600 | 0.25324400  |
| C  | 1.68272700  | 0.41733800  | -0.40778600 |
| C  | 1.80188200  | 1.43685900  | -1.35689700 |
| C  | 2.82987600  | -0.23374600 | 0.06917400  |
| C  | 3.06245900  | 1.80800800  | -1.81867200 |
| H  | 0.92190200  | 1.94394000  | -1.73729700 |
| C  | 4.08369000  | 0.14343800  | -0.39805800 |
| H  | 2.75295500  | -1.03135600 | 0.80093600  |
| C  | 4.20158700  | 1.16715500  | -1.33796000 |
| H  | 3.15009400  | 2.59955300  | -2.55494800 |
| H  | 4.96772800  | -0.36110200 | -0.02367600 |
| H  | 5.18180200  | 1.46247100  | -1.69733800 |
| C  | -1.18505500 | 1.09934300  | -0.41261200 |
| C  | -1.19521900 | 2.43217100  | 0.02348700  |
| C  | -2.13005700 | 0.66066300  | -1.34430000 |
| C  | -2.15413700 | 3.31199400  | -0.46543100 |
| H  | -0.45983900 | 2.78939700  | 0.73737100  |
| C  | -3.08762500 | 1.54922400  | -1.82772500 |
| H  | -2.12583600 | -0.36557700 | -1.69509300 |
| C  | -3.10349700 | 2.87018200  | -1.38697400 |
| H  | -2.15955700 | 4.34133700  | -0.12366800 |
| H  | -3.82029800 | 1.20509900  | -2.54955000 |
| H  | -3.85314900 | 3.55856100  | -1.76281700 |
| C  | -0.35160200 | -1.72926400 | -0.27185000 |
| C  | 0.53595900  | -2.47978700 | -1.04771700 |
| C  | -1.55318600 | -2.30201900 | 0.17096200  |
| C  | 0.22969400  | -3.80124200 | -1.36495100 |
| H  | 1.46342500  | -2.04596700 | -1.40485200 |
| C  | -1.85021600 | -3.62104200 | -0.15084400 |
| H  | -2.25756600 | -1.72671200 | 0.76314000  |
| C  | -0.95609000 | -4.37389800 | -0.91189800 |
| H  | 0.92164800  | -4.38157000 | -1.96557600 |
| H  | -2.77851400 | -4.06044300 | 0.19769100  |
| H  | -1.18585100 | -5.40633100 | -1.15342000 |
| Si | 0.07464900  | 0.02994100  | 2.58895400  |
| C  | 0.50937600  | 1.79586300  | 3.00148400  |
| C  | 1.69076600  | 2.38510300  | 2.51735200  |
| C  | -0.36191800 | 2.58067900  | 3.77189200  |
| C  | 1.98139100  | 3.71990400  | 2.78179100  |
| H  | 2.39070500  | 1.80585800  | 1.92118600  |
| C  | -0.06906100 | 3.91635300  | 4.04107400  |
| H  | -1.27950100 | 2.15272300  | 4.16522800  |
| C  | 1.09882600  | 4.48831900  | 3.54086900  |
| H  | 2.89416200  | 4.16009200  | 2.39380600  |
| H  | -0.75367900 | 4.50948500  | 4.63853900  |
| H  | 1.32220500  | 5.53093300  | 3.74311000  |
| C  | -1.66406600 | -0.46409300 | 3.04720500  |

|   |             |             |            |
|---|-------------|-------------|------------|
| C | -2.76541900 | 0.30649500  | 2.63382000 |
| C | -1.90845300 | -1.65428300 | 3.74859600 |
| C | -4.06683100 | -0.10999600 | 2.89698300 |
| H | -2.61524400 | 1.23809600  | 2.09489400 |
| C | -3.21126500 | -2.07158400 | 4.01365100 |
| H | -1.08070600 | -2.26929600 | 4.08884500 |
| C | -4.29108200 | -1.30438800 | 3.58166500 |
| H | -4.90418200 | 0.49533800  | 2.56548400 |
| H | -3.38120800 | -2.99847600 | 4.55169400 |
| H | -5.30602000 | -1.63333400 | 3.78059600 |
| C | 1.38446900  | -1.21472900 | 3.05302300 |
| C | 1.27374800  | -2.56556100 | 2.67761100 |
| C | 2.53600100  | -0.80568400 | 3.74302200 |
| C | 2.28655300  | -3.47301200 | 2.97251700 |
| H | 0.39549000  | -2.92013400 | 2.14501900 |
| C | 3.54999100  | -1.71432900 | 4.03958100 |
| H | 2.65184300  | 0.23035300  | 4.04775400 |
| C | 3.42839700  | -3.04669800 | 3.65070000 |
| H | 2.18389900  | -4.51095300 | 2.67321400 |
| H | 4.43494200  | -1.38005600 | 4.57119300 |
| H | 4.21945500  | -3.75392400 | 3.87849000 |

50

Ph<sub>3</sub>Si-2-Me-THF<sup>+</sup>. Gibbs free energy: -1255.460198

|    |             |             |             |
|----|-------------|-------------|-------------|
| C  | -1.11448300 | -0.27742500 | 2.49777800  |
| O  | -0.22646600 | 0.41842800  | 1.53755300  |
| C  | 0.14936400  | 1.78578700  | 2.07778900  |
| C  | -0.72245300 | 1.91065800  | 3.32615300  |
| C  | -1.83410500 | 0.87187700  | 3.16173700  |
| H  | -1.74272300 | -0.95626800 | 1.92438000  |
| H  | -0.46938400 | -0.83379100 | 3.17974800  |
| H  | -0.15649600 | 2.47620600  | 1.29127800  |
| H  | -0.12711300 | 1.68804000  | 4.21655400  |
| H  | -1.10976300 | 2.92628700  | 3.41829000  |
| H  | -2.26868800 | 0.57065000  | 4.11578800  |
| H  | -2.63337400 | 1.24069400  | 2.51323600  |
| C  | 1.63647400  | 1.83136400  | 2.32605900  |
| H  | 2.20936700  | 1.72412800  | 1.40376100  |
| H  | 1.87472500  | 2.80615600  | 2.76137400  |
| H  | 1.93664100  | 1.05731200  | 3.03719800  |
| Si | -0.00424600 | -0.14569900 | -0.16549500 |
| C  | -1.71039000 | -0.70566400 | -0.64768600 |
| C  | -2.82475100 | 0.13904900  | -0.50024400 |
| C  | -1.91170100 | -1.98755000 | -1.18075100 |
| C  | -4.09481500 | -0.28012200 | -0.88277000 |
| H  | -2.71378100 | 1.13071700  | -0.06902800 |
| C  | -3.18251400 | -2.40657100 | -1.57103400 |
| H  | -1.07672600 | -2.67403200 | -1.28782600 |
| C  | -4.27344100 | -1.55322900 | -1.42439500 |



|   |             |             |             |
|---|-------------|-------------|-------------|
| H | -4.94305200 | 0.38502600  | -0.75853000 |
| H | -3.31943900 | -3.40000500 | -1.98537400 |
| H | -5.26350500 | -1.88045000 | -1.72543900 |
| C | 0.63212400  | 1.32921800  | -1.09674000 |
| C | 2.01527700  | 1.48589500  | -1.28660100 |
| C | -0.23202600 | 2.28766900  | -1.65154700 |
| C | 2.52033200  | 2.57745100  | -1.98801600 |
| H | 2.70726200  | 0.74707700  | -0.89042000 |
| C | 0.27134500  | 3.38155900  | -2.34952800 |
| H | -1.30753000 | 2.18371400  | -1.54765700 |
| C | 1.64803200  | 3.52845100  | -2.51498500 |
| H | 3.59117800  | 2.68429000  | -2.12572800 |
| H | -0.41016500 | 4.11489800  | -2.76794300 |
| H | 2.04057500  | 4.38052200  | -3.06063500 |
| C | 1.25724100  | -1.50092500 | -0.03668800 |
| C | 1.84607200  | -1.87131700 | 1.18015400  |
| C | 1.66372000  | -2.16565800 | -1.20641000 |
| C | 2.80535300  | -2.88056200 | 1.23174000  |
| H | 1.56966300  | -1.36752600 | 2.10091900  |
| C | 2.61977600  | -3.17600500 | -1.15678900 |
| H | 1.23951400  | -1.89303400 | -2.16999100 |
| C | 3.19073100  | -3.53512300 | 0.06389600  |
| H | 3.25310500  | -3.15142100 | 2.18228700  |
| H | 2.92131500  | -3.67930700 | -2.06952200 |
| H | 3.93861000  | -4.32047700 | 0.10306500  |

40

P<sup>t</sup>Bu<sub>3</sub>. Gibbs free energy: -814.455735

|   |             |             |             |
|---|-------------|-------------|-------------|
| P | -0.00014400 | 0.00016200  | 0.70509400  |
| C | 1.44859900  | 1.05506800  | 0.00844600  |
| C | 2.68889100  | 0.76568500  | 0.88333100  |
| C | 1.81961500  | 0.84949200  | -1.46899500 |
| C | 1.14342300  | 2.54988500  | 0.22470000  |
| H | 2.47214800  | 0.93122800  | 1.94351700  |
| H | 3.07071100  | -0.24808900 | 0.77080200  |
| H | 3.49531100  | 1.45092800  | 0.59349400  |
| H | 0.97869500  | 1.03796300  | -2.13947800 |
| H | 2.62208100  | 1.54855400  | -1.73799000 |
| H | 2.19185700  | -0.15746800 | -1.66791300 |
| H | 2.05285800  | 3.12479100  | 0.01267600  |
| H | 0.36460100  | 2.92695200  | -0.43977200 |
| H | 0.85631500  | 2.76122100  | 1.25978300  |
| C | -1.63768600 | 0.72714600  | 0.00833700  |
| C | -2.01176300 | 1.94123700  | 0.88727200  |
| C | -1.64286800 | 1.15583500  | -1.46772500 |
| C | -2.77902500 | -0.28651700 | 0.21725300  |
| H | -2.06721800 | 1.66156000  | 1.94420200  |
| H | -1.31790600 | 2.77561300  | 0.79494000  |
| H | -3.00113800 | 2.30606300  | 0.58424100  |

|   |             |             |             |
|---|-------------|-------------|-------------|
| H | -1.37444000 | 0.33824000  | -2.13997900 |
| H | -2.65170800 | 1.49182600  | -1.73992800 |
| H | -0.96485700 | 1.98941800  | -1.66148100 |
| H | -3.73164200 | 0.21546000  | 0.00950500  |
| H | -2.71683500 | -1.14318700 | -0.45544300 |
| H | -2.81874600 | -0.65122300 | 1.24867800  |
| C | 0.18856700  | -1.78141500 | 0.00868400  |
| C | -0.67855500 | -2.71095300 | 0.88693600  |
| C | -0.17604500 | -2.00216900 | -1.46844200 |
| C | 1.63696000  | -2.26288900 | 0.22113100  |
| H | -0.42664000 | -2.60111800 | 1.94666700  |
| H | -1.74843300 | -2.54024500 | 0.77492300  |
| H | -0.48399400 | -3.75235500 | 0.60162500  |
| H | 0.40148800  | -1.36250700 | -2.13908600 |
| H | 0.03762100  | -3.04465500 | -1.73763100 |
| H | -1.23607700 | -1.83062500 | -1.66616700 |
| H | 1.67776700  | -3.33980100 | 0.01884600  |
| H | 2.34830000  | -1.78355700 | -0.45325900 |
| H | 1.97135700  | -2.10983800 | 1.25225300  |

53

Me<sub>3</sub>Si-P<sup>t</sup>Bu<sub>3</sub><sup>+</sup>. Gibbs free energy: -1223.45397

|   |             |             |             |
|---|-------------|-------------|-------------|
| P | 0.27588100  | -0.00032900 | 0.00016100  |
| C | 0.87363900  | -1.14685400 | 1.40928300  |
| C | 0.69507800  | -2.62869900 | 1.02645100  |
| C | 2.35369100  | -0.91446000 | 1.76312500  |
| C | 0.01639000  | -0.91327200 | 2.67009200  |
| H | -0.32816100 | -2.87035300 | 0.73460800  |
| H | 1.37699200  | -2.95239900 | 0.24027300  |
| H | 0.92497700  | -3.22403700 | 1.91561200  |
| H | 2.53119800  | 0.06157600  | 2.21539700  |
| H | 2.64005900  | -1.66806500 | 2.50382600  |
| H | 3.02063600  | -1.03000100 | 0.90823000  |
| H | 0.42177400  | -1.54439300 | 3.46715200  |
| H | 0.03428200  | 0.11298200  | 3.03141900  |
| H | -1.02245600 | -1.21519500 | 2.52310300  |
| C | 0.87042300  | 1.79400800  | 0.28925300  |
| C | 0.68610900  | 2.20388200  | 1.76324500  |
| C | 2.35172700  | 1.98835400  | -0.08357800 |
| C | 0.01297100  | 2.76838900  | -0.54453500 |
| H | -0.33742200 | 2.06831800  | 2.11587400  |
| H | 1.36779900  | 1.68852500  | 2.43961400  |
| H | 0.91177400  | 3.27246600  | 1.83443900  |
| H | 2.53516700  | 1.88427300  | -1.15332000 |
| H | 2.63089500  | 3.01060000  | 0.19158600  |
| H | 3.01922500  | 1.31322600  | 0.45292200  |
| H | 0.41531400  | 3.77473600  | -0.39151700 |
| H | 0.03462300  | 2.57221900  | -1.61475900 |
| H | -1.02692400 | 2.78873500  | -0.21269100 |

|    |             |             |             |
|----|-------------|-------------|-------------|
| C  | 0.87566600  | -0.64586700 | -1.69669000 |
| C  | 0.69447700  | 0.42685400  | -2.78775900 |
| C  | 2.35715900  | -1.06392900 | -1.67291400 |
| C  | 0.02217500  | -1.85654400 | -2.12704800 |
| H  | -0.32939200 | 0.79847200  | -2.85168900 |
| H  | 1.37376100  | 1.27148500  | -2.67392100 |
| H  | 0.92646100  | -0.04299900 | -3.74866500 |
| H  | 2.53746100  | -1.94276400 | -1.05318300 |
| H  | 2.64405500  | -1.32843100 | -2.69581500 |
| H  | 3.02153500  | -0.26377700 | -1.34484000 |
| H  | 0.42930400  | -2.22761900 | -3.07284200 |
| H  | 0.04226500  | -2.68427700 | -1.42096000 |
| H  | -1.01760500 | -1.58128200 | -2.31489300 |
| Si | -2.08149500 | -0.00271800 | -0.00145300 |
| C  | -2.70979700 | 1.05230400  | 1.41611800  |
| H  | -3.79664500 | 0.90782200  | 1.43634100  |
| H  | -2.32174800 | 0.75368500  | 2.39205800  |
| H  | -2.52635100 | 2.11996100  | 1.27481700  |
| C  | -2.70513900 | 0.69889900  | -1.62521900 |
| H  | -2.52224100 | 0.04106000  | -2.47800400 |
| H  | -3.79179900 | 0.79315700  | -1.51215400 |
| H  | -2.31169300 | 1.69157800  | -1.85347900 |
| C  | -2.70638400 | -1.75915700 | 0.20240600  |
| H  | -3.79445300 | -1.70395000 | 0.07721600  |
| H  | -2.32485800 | -2.45088200 | -0.55138300 |
| H  | -2.51419700 | -2.17491100 | 1.19417500  |

43

P(*p*-tol)<sub>3</sub>. Gibbs free energy: -1153.715656

|   |             |             |             |
|---|-------------|-------------|-------------|
| P | -0.01940300 | -0.01086300 | 1.45826200  |
| C | -1.63654200 | -0.34465200 | 0.64485700  |
| C | -1.79173100 | -1.09238800 | -0.52673400 |
| C | -2.78255600 | 0.19722600  | 1.24033700  |
| C | -3.05296300 | -1.28315800 | -1.08718900 |
| H | -0.92351800 | -1.52824000 | -1.01221100 |
| C | -4.03949700 | 0.01373100  | 0.67127300  |
| H | -2.69324500 | 0.77324300  | 2.15842100  |
| C | -4.19708100 | -0.73369000 | -0.50074800 |
| H | -3.14690900 | -1.86468800 | -2.00085700 |
| H | -4.91193700 | 0.45234200  | 1.14872600  |
| C | 1.09055700  | -1.23112100 | 0.63938400  |
| C | 1.25331800  | -2.47852100 | 1.25533800  |
| C | 1.77509800  | -0.99046900 | -0.55618600 |
| C | 2.06215000  | -3.45737200 | 0.68547100  |
| H | 0.74230200  | -2.68890100 | 2.19186100  |
| C | 2.59104700  | -1.96970000 | -1.11909000 |
| H | 1.67170800  | -0.03255500 | -1.05751800 |
| C | 2.74921000  | -3.21784500 | -0.50981400 |
| H | 2.16879800  | -4.41879800 | 1.18129900  |

|   |             |             |             |
|---|-------------|-------------|-------------|
| H | 3.11001800  | -1.75921300 | -2.05076800 |
| C | 0.50216800  | 1.56042900  | 0.65125200  |
| C | -0.11315200 | 2.12049500  | -0.47253300 |
| C | 1.60385000  | 2.22633700  | 1.20336200  |
| C | 0.36714000  | 3.30467100  | -1.02953400 |
| H | -0.97012500 | 1.63003800  | -0.92490500 |
| C | 2.08813500  | 3.40121600  | 0.63668200  |
| H | 2.09621000  | 1.81816500  | 2.08297700  |
| C | 1.47480500  | 3.96356500  | -0.48821800 |
| H | -0.12578900 | 3.71890600  | -1.90544800 |
| H | 2.95147000  | 3.89176500  | 1.07881800  |
| C | -5.56272100 | -0.96721100 | -1.09458900 |
| H | -5.50437700 | -1.11515500 | -2.17612800 |
| H | -6.02220500 | -1.86312900 | -0.66262100 |
| H | -6.23188200 | -0.12585400 | -0.89558900 |
| C | 3.65859200  | -4.26530400 | -1.09993500 |
| H | 3.82372000  | -4.09366700 | -2.16661700 |
| H | 4.63581100  | -4.25031500 | -0.60510400 |
| H | 3.24148800  | -5.26808100 | -0.97182700 |
| C | 1.97371900  | 5.25813400  | -1.07768600 |
| H | 1.47483300  | 6.11349900  | -0.60874400 |
| H | 3.04891300  | 5.37811000  | -0.92042600 |
| H | 1.77445500  | 5.30924700  | -2.15147800 |

56

Me<sub>3</sub>Si-P(*p*-tol)<sub>3</sub><sup>+</sup>. Gibbs free energy: -1562.710617

|   |             |             |             |
|---|-------------|-------------|-------------|
| P | -0.00951500 | 0.00831100  | 0.43169100  |
| C | 0.54801500  | -1.60158700 | -0.17895700 |
| C | 1.50232500  | -1.69472900 | -1.19599700 |
| C | -0.01368700 | -2.77118200 | 0.34630100  |
| C | 1.88362000  | -2.94248000 | -1.67724600 |
| H | 1.94635300  | -0.79932800 | -1.61886000 |
| C | 0.37387800  | -4.01171100 | -0.14424400 |
| H | -0.76671100 | -2.72458500 | 1.12741800  |
| C | 1.32976400  | -4.11859100 | -1.16128200 |
| H | 2.62384700  | -3.00057800 | -2.46970000 |
| H | -0.07462100 | -4.90976800 | 0.26963800  |
| C | 1.13066900  | 1.26757600  | -0.19215700 |
| C | 2.40976800  | 1.37377600  | 0.37070500  |
| C | 0.76985700  | 2.11362800  | -1.24230100 |
| C | 3.30738000  | 2.31363800  | -0.11442300 |
| H | 2.71809500  | 0.71549200  | 1.17765000  |
| C | 1.67957800  | 3.05381200  | -1.71999500 |
| H | -0.21363700 | 2.04229400  | -1.69525900 |
| C | 2.95655400  | 3.17123300  | -1.16626400 |
| H | 4.29574700  | 2.38473600  | 0.32993200  |
| H | 1.38670800  | 3.70478600  | -2.53824200 |
| C | -1.64993600 | 0.33371500  | -0.26204900 |
| C | -2.20405200 | -0.50807000 | -1.22752400 |

|    |             |             |             |
|----|-------------|-------------|-------------|
| C  | -2.37264800 | 1.45404300  | 0.17174400  |
| C  | -3.46511100 | -0.23132700 | -1.75019200 |
| H  | -1.66108100 | -1.37955000 | -1.57818400 |
| C  | -3.62599100 | 1.72083600  | -0.35925200 |
| H  | -1.95894200 | 2.13031500  | 0.91416500  |
| C  | -4.19469000 | 0.88179000  | -1.32783400 |
| H  | -3.88297400 | -0.89596900 | -2.50026400 |
| H  | -4.17357500 | 2.59392400  | -0.01664700 |
| C  | 1.77056300  | -5.46411800 | -1.67241500 |
| H  | 1.99276200  | -5.42566900 | -2.74181900 |
| H  | 2.68129600  | -5.78632900 | -1.15652700 |
| H  | 1.00459500  | -6.22449500 | -1.50312800 |
| C  | 3.93779500  | 4.19512000  | -1.67125300 |
| H  | 3.58153300  | 4.67173000  | -2.58683900 |
| H  | 4.09583100  | 4.97599800  | -0.92025800 |
| H  | 4.90947000  | 3.73590600  | -1.87412600 |
| C  | -5.55762100 | 1.18602300  | -1.88963000 |
| H  | -6.30809000 | 1.20799300  | -1.09363000 |
| H  | -5.56556600 | 2.16812600  | -2.37218900 |
| H  | -5.86176500 | 0.43991700  | -2.62650600 |
| Si | -0.08634500 | 0.03970400  | 2.76003900  |
| C  | 0.12992400  | 1.83379500  | 3.23728900  |
| H  | 0.20299800  | 1.89295400  | 4.32885200  |
| H  | 1.04411600  | 2.25919900  | 2.81415100  |
| H  | -0.71775800 | 2.45019800  | 2.92536400  |
| C  | 1.32380300  | -1.04713400 | 3.33042100  |
| H  | 1.23834100  | -1.17571400 | 4.41504100  |
| H  | 1.28745000  | -2.03764000 | 2.86887200  |
| H  | 2.29999900  | -0.60061600 | 3.12261000  |
| C  | -1.76750200 | -0.64335700 | 3.20837400  |
| H  | -1.90447300 | -0.53161600 | 4.28958800  |
| H  | -2.57388000 | -0.10004500 | 2.70772300  |
| H  | -1.86247900 | -1.70591100 | 2.96805100  |

52

PCy<sub>3</sub>. Gibbs free energy: -1046.572961

|   |             |             |             |
|---|-------------|-------------|-------------|
| P | -0.35311500 | 0.01269100  | 0.31545800  |
| C | -1.70640100 | -0.74502900 | -0.77712800 |
| C | -2.40522500 | -1.95413100 | -0.12307600 |
| C | -2.80390500 | 0.25272900  | -1.19424100 |
| H | -1.21090600 | -1.08515100 | -1.69522000 |
| C | -3.27002700 | -1.55336700 | 1.07729500  |
| H | -1.69133400 | -2.73222600 | 0.16218900  |
| H | -3.05373300 | -2.40814500 | -0.88606100 |
| C | -3.67253600 | 0.70129600  | -0.01487600 |
| H | -2.38328500 | 1.11114000  | -1.72374700 |
| H | -3.44617300 | -0.26087500 | -1.92392600 |
| C | -4.31472800 | -0.50274400 | 0.68364000  |
| H | -2.62923500 | -1.15092100 | 1.87229300  |

|   |             |             |             |
|---|-------------|-------------|-------------|
| H | -3.76521600 | -2.44031300 | 1.48811200  |
| H | -4.44876300 | 1.39029100  | -0.36674900 |
| H | -3.05860400 | 1.25648300  | 0.70619600  |
| H | -4.87480200 | -0.17553100 | 1.56679600  |
| H | -5.04149700 | -0.96290800 | -0.00087800 |
| C | 0.72037400  | -1.52737700 | 0.53926900  |
| C | 1.08301900  | -2.44110300 | -0.64960700 |
| C | 1.90997800  | -1.38979100 | 1.51994400  |
| H | -0.02918500 | -2.08068000 | 1.11989300  |
| C | 2.43969100  | -2.15199700 | -1.29324200 |
| H | 0.29685900  | -2.43053100 | -1.41000000 |
| H | 1.11394900  | -3.47120600 | -0.26450300 |
| C | 3.28617400  | -1.17103700 | 0.88184700  |
| H | 1.70291300  | -0.60480800 | 2.25684400  |
| H | 1.96427200  | -2.33120200 | 2.08480800  |
| C | 3.55880000  | -2.16642300 | -0.24881100 |
| H | 2.41576200  | -1.18426800 | -1.80724800 |
| H | 2.63815300  | -2.90491400 | -2.06459500 |
| H | 4.05250500  | -1.27151300 | 1.65924300  |
| H | 3.37794700  | -0.15275400 | 0.49743800  |
| H | 4.52383800  | -1.94725500 | -0.71932900 |
| H | 3.63498000  | -3.17900700 | 0.17268000  |
| C | 0.33561100  | 1.27226400  | -0.91870500 |
| C | -0.38512800 | 2.62869600  | -0.70294200 |
| C | 1.84820600  | 1.53509900  | -0.87908200 |
| H | 0.08763900  | 0.90460900  | -1.92339800 |
| C | 0.07768600  | 3.37794700  | 0.55163900  |
| H | -1.46976700 | 2.50482800  | -0.65743500 |
| H | -0.18134900 | 3.25289600  | -1.58487100 |
| C | 2.31248800  | 2.24046500  | 0.39819500  |
| H | 2.40209400  | 0.61019400  | -1.03420200 |
| H | 2.09045300  | 2.18217900  | -1.73484500 |
| C | 1.59357600  | 3.57892400  | 0.57240200  |
| H | -0.22078400 | 2.81027100  | 1.44220500  |
| H | -0.43610800 | 4.34440100  | 0.60483500  |
| H | 3.39789900  | 2.38924400  | 0.36371000  |
| H | 2.10655500  | 1.60681500  | 1.27111700  |
| H | 1.90119200  | 4.06082500  | 1.50712200  |
| H | 1.88454200  | 4.25314900  | -0.24547300 |

65

Me<sub>3</sub>Si-PCy<sub>3</sub><sup>+</sup>. Gibbs free energy: -1455.566893

|   |             |             |             |
|---|-------------|-------------|-------------|
| P | -0.25011600 | -0.06081900 | 0.40462600  |
| C | -1.64528500 | -1.11786900 | -0.30015000 |
| C | -2.21073300 | -2.20296300 | 0.64005700  |
| C | -2.80655200 | -0.41703300 | -1.03112400 |
| H | -1.07719300 | -1.63190300 | -1.08192100 |
| C | -3.34766500 | -1.72371400 | 1.54527200  |
| H | -1.42721200 | -2.68092100 | 1.23553200  |

|    |             |             |             |
|----|-------------|-------------|-------------|
| H  | -2.59938800 | -2.99148700 | -0.01622900 |
| C  | -3.90680400 | 0.10123100  | -0.10831600 |
| H  | -2.45209000 | 0.36239400  | -1.70797400 |
| H  | -3.24155300 | -1.18716300 | -1.68134100 |
| C  | -4.46257800 | -1.02654200 | 0.76371600  |
| H  | -2.96167400 | -1.03615000 | 2.30331500  |
| H  | -3.74741300 | -2.58336500 | 2.09227000  |
| H  | -4.70522000 | 0.54243200  | -0.71309900 |
| H  | -3.52268200 | 0.90414300  | 0.53083200  |
| H  | -5.21620600 | -0.63775900 | 1.45622200  |
| H  | -4.96792800 | -1.75887900 | 0.12048800  |
| C  | 1.06613600  | -1.38689400 | 0.63763800  |
| C  | 1.44974000  | -2.25812300 | -0.57810700 |
| C  | 2.33434500  | -1.02663600 | 1.43918700  |
| H  | 0.47762500  | -2.03203300 | 1.30116900  |
| C  | 2.59227500  | -1.70452600 | -1.42976000 |
| H  | 0.58985000  | -2.49306600 | -1.20916200 |
| H  | 1.77228300  | -3.21751800 | -0.15335800 |
| C  | 3.49658800  | -0.47527300 | 0.61377000  |
| H  | 2.10946100  | -0.35340800 | 2.26695800  |
| H  | 2.66104900  | -1.96650400 | 1.90238000  |
| C  | 3.82512600  | -1.37607000 | -0.58116600 |
| H  | 2.25635100  | -0.82270000 | -1.98471800 |
| H  | 2.85497200  | -2.45165500 | -2.18539600 |
| H  | 4.37317200  | -0.39396800 | 1.26465100  |
| H  | 3.27692900  | 0.54282400  | 0.28087800  |
| H  | 4.59723200  | -0.91023300 | -1.20180300 |
| H  | 4.24795700  | -2.31665500 | -0.20341700 |
| C  | 0.00706300  | 1.20061500  | -0.95684200 |
| C  | -0.99646800 | 2.37868700  | -0.86638800 |
| C  | 1.41730500  | 1.74934600  | -1.22603100 |
| H  | -0.26235400 | 0.59661800  | -1.83224900 |
| C  | -0.54107700 | 3.55009300  | 0.00857300  |
| H  | -1.98333400 | 2.04857600  | -0.53426300 |
| H  | -1.12965600 | 2.74003200  | -1.89362000 |
| C  | 1.86206100  | 2.86565200  | -0.28504500 |
| H  | 2.15116900  | 0.94809600  | -1.25201400 |
| H  | 1.38214300  | 2.15502900  | -2.24562200 |
| C  | 0.87207100  | 4.02946000  | -0.31955500 |
| H  | -0.58244200 | 3.26921400  | 1.06457200  |
| H  | -1.26092900 | 4.36622300  | -0.10981100 |
| H  | 2.85973500  | 3.20446600  | -0.58226000 |
| H  | 1.95821500  | 2.48780400  | 0.73976500  |
| H  | 1.17413200  | 4.81053700  | 0.38545900  |
| H  | 0.88329400  | 4.48007400  | -1.32056100 |
| Si | -0.58135800 | 0.75924000  | 2.58292300  |
| C  | -0.49786900 | -0.77287300 | 3.66504500  |
| H  | 0.52078500  | -1.16448800 | 3.73357700  |

|   |             |             |            |
|---|-------------|-------------|------------|
| H | -0.80192600 | -0.46968000 | 4.67350800 |
| H | -1.15901800 | -1.58370100 | 3.35277000 |
| C | -2.22114400 | 1.65439300  | 2.74344400 |
| H | -3.08043600 | 0.98269300  | 2.78176100 |
| H | -2.17910000 | 2.19241200  | 3.69779000 |
| H | -2.39263600 | 2.39543900  | 1.95924200 |
| C | 0.79059200  | 1.93252900  | 3.10082600 |
| H | 0.70276700  | 2.92426200  | 2.65361700 |
| H | 0.66836700  | 2.05032400  | 4.18474300 |
| H | 1.80191600  | 1.56072800  | 2.92648900 |

43

P(o-tol)<sub>3</sub>. Gibbs free energy: -1153.69451

|   |             |             |             |
|---|-------------|-------------|-------------|
| P | -0.04857100 | -0.03248400 | -0.92309100 |
| C | 0.68801800  | 1.55365900  | -0.33233100 |
| C | 1.61827200  | 1.79025000  | 0.70258700  |
| C | 0.24291300  | 2.63833800  | -1.10588300 |
| C | 2.04879000  | 3.10625700  | 0.91576400  |
| C | 0.65896500  | 3.94179400  | -0.85873700 |
| H | -0.45478700 | 2.45331700  | -1.91948800 |
| C | 1.57833200  | 4.17537900  | 0.15929300  |
| H | 2.76696800  | 3.29609400  | 1.70905200  |
| H | 0.28206700  | 4.75849400  | -1.46601500 |
| H | 1.93270300  | 5.18111200  | 0.36275800  |
| C | 0.99359100  | -1.41322500 | -0.27997800 |
| C | 2.14191000  | -1.58511100 | -1.07058000 |
| C | 0.78016100  | -2.28390700 | 0.81010800  |
| C | 3.09837300  | -2.55250800 | -0.78452500 |
| H | 2.29315500  | -0.93321000 | -1.92804900 |
| C | 1.74001500  | -3.27292600 | 1.06267600  |
| C | 2.89094900  | -3.40877600 | 0.29231200  |
| H | 3.98443700  | -2.64322000 | -1.40455300 |
| H | 1.58250900  | -3.94750700 | 1.90011400  |
| H | 3.61530000  | -4.18099800 | 0.53173600  |
| C | -1.73838600 | -0.19150000 | -0.19931400 |
| C | -2.32277200 | 0.47630700  | 0.89828900  |
| C | -2.51517900 | -1.10640400 | -0.92897100 |
| C | -3.65352400 | 0.17988300  | 1.22023700  |
| C | -3.82585700 | -1.40812900 | -0.57640100 |
| H | -2.07515400 | -1.59874300 | -1.79309400 |
| C | -4.40136500 | -0.75312400 | 0.50779400  |
| H | -4.10977400 | 0.68856900  | 2.06534700  |
| H | -4.39265600 | -2.13227500 | -1.15270500 |
| H | -5.42767300 | -0.95898100 | 0.79548900  |
| C | -1.59402600 | 1.47262900  | 1.76510200  |
| H | -0.66162400 | 1.06068700  | 2.15972600  |
| H | -1.33353100 | 2.38037600  | 1.21406900  |
| H | -2.21683000 | 1.75912200  | 2.61572800  |
| C | 2.15955800  | 0.71844500  | 1.61608200  |



|   |             |             |            |
|---|-------------|-------------|------------|
| H | 1.35845700  | 0.12714700  | 2.06666400 |
| H | 2.80896900  | 0.01854300  | 1.08300900 |
| H | 2.73695800  | 1.17006000  | 2.42595900 |
| C | -0.40210600 | -2.19930600 | 1.74373200 |
| H | -0.49551600 | -1.20563900 | 2.19057100 |
| H | -1.34545400 | -2.40720400 | 1.23210900 |
| H | -0.29087700 | -2.92025800 | 2.55685800 |

56

Me<sub>3</sub>Si-P(*o*-tol)<sub>3</sub><sup>+</sup>. Gibbs free energy: -1562.6866

|    |             |             |             |
|----|-------------|-------------|-------------|
| P  | 0.00861100  | -0.01798500 | 0.02420800  |
| C  | 1.61960400  | 0.65536700  | -0.50111600 |
| C  | 1.84188900  | 1.56489200  | -1.55541900 |
| C  | 2.70241700  | 0.16199100  | 0.24245400  |
| C  | 3.16355000  | 1.96439400  | -1.78955900 |
| C  | 4.00417800  | 0.56066300  | -0.02364000 |
| H  | 2.53686400  | -0.56612900 | 1.02974800  |
| C  | 4.23158800  | 1.48089900  | -1.04253100 |
| H  | 3.35626800  | 2.66713500  | -2.59451000 |
| H  | 4.82508400  | 0.15876900  | 0.55950200  |
| H  | 5.23981800  | 1.81490500  | -1.26406100 |
| C  | -1.36530700 | 1.04217800  | -0.53552000 |
| C  | -1.43143200 | 2.26515500  | 0.14924600  |
| C  | -2.29468100 | 0.75175200  | -1.55486700 |
| C  | -2.40552600 | 3.20766000  | -0.14433900 |
| H  | -0.69489000 | 2.50449100  | 0.90948000  |
| C  | -3.27881900 | 1.71348600  | -1.81708500 |
| C  | -3.34385000 | 2.92077900  | -1.13110600 |
| H  | -2.42885200 | 4.14984300  | 0.39160400  |
| H  | -4.00636100 | 1.50834200  | -2.59642600 |
| H  | -4.11956100 | 3.63866900  | -1.37578400 |
| C  | -0.19986900 | -1.75043200 | -0.50324900 |
| C  | 0.48941900  | -2.39083800 | -1.55372500 |
| C  | -1.16866700 | -2.45134100 | 0.23096300  |
| C  | 0.18420000  | -3.73584600 | -1.79591900 |
| C  | -1.46331900 | -3.77905900 | -0.04199800 |
| H  | -1.72475500 | -1.95216900 | 1.01750000  |
| C  | -0.77073800 | -4.42770900 | -1.05959600 |
| H  | 0.70499100  | -4.24730900 | -2.59966900 |
| H  | -2.22170500 | -4.29619300 | 0.53507000  |
| H  | -0.97664100 | -5.46857500 | -1.28597500 |
| Si | -0.03412300 | 0.01597100  | 2.39023100  |
| C  | 0.76125200  | -1.56998900 | 2.98487400  |
| H  | 0.57126600  | -1.63801100 | 4.06227900  |
| H  | 0.33754900  | -2.45911900 | 2.51217200  |
| H  | 1.84469200  | -1.58014000 | 2.84101800  |
| C  | -1.83352400 | 0.13212100  | 2.89085500  |
| H  | -1.85475300 | 0.32004400  | 3.97054800  |
| H  | -2.34942900 | 0.95863200  | 2.39564400  |

|   |             |             |             |
|---|-------------|-------------|-------------|
| H | -2.39111500 | -0.78956900 | 2.70662300  |
| C | 0.93368300  | 1.52075500  | 2.93926500  |
| H | 1.11801200  | 1.40499900  | 4.01353900  |
| H | 1.90196000  | 1.60682500  | 2.44044200  |
| H | 0.38261200  | 2.45410800  | 2.79933000  |
| C | -2.27764800 | -0.48912800 | -2.41319800 |
| H | -1.30149800 | -0.65043300 | -2.87881400 |
| H | -2.52144800 | -1.38916100 | -1.84376200 |
| H | -3.01062600 | -0.39138500 | -3.21570000 |
| C | 1.49361500  | -1.72393800 | -2.46055100 |
| H | 1.10021200  | -0.80307100 | -2.89893400 |
| H | 2.41717800  | -1.46905200 | -1.93510700 |
| H | 1.74946700  | -2.39376100 | -3.28312900 |
| C | 0.77314500  | 2.10138600  | -2.47546700 |
| H | 0.12463500  | 1.31084300  | -2.86075000 |
| H | 0.13144200  | 2.83143300  | -1.97512200 |
| H | 1.23714400  | 2.59199100  | -3.33266000 |

37

PPh<sub>2</sub>(*p*-tol). Gibbs free energy: -1075.14702

|   |             |             |             |
|---|-------------|-------------|-------------|
| P | -0.02484900 | -0.01583600 | 1.45494800  |
| C | -1.64209400 | -0.34581900 | 0.63558800  |
| C | -1.79589500 | -1.13651200 | -0.50830900 |
| C | -2.78033700 | 0.23415300  | 1.21194100  |
| C | -3.05761200 | -1.33396100 | -1.06853800 |
| H | -0.92878900 | -1.60076200 | -0.96815400 |
| C | -4.03951400 | 0.04776600  | 0.64630200  |
| H | -2.68184800 | 0.83805700  | 2.11078800  |
| C | -4.18076400 | -0.73979800 | -0.49609000 |
| H | -3.16063600 | -1.95068700 | -1.95609100 |
| H | -4.91000300 | 0.50860900  | 1.10267900  |
| C | 1.09033800  | -1.22881100 | 0.63461100  |
| C | 1.26822400  | -2.47085800 | 1.25688900  |
| C | 1.76125300  | -0.99005000 | -0.56928300 |
| C | 2.07909600  | -3.44704600 | 0.68525900  |
| H | 0.76740000  | -2.67920600 | 2.19924000  |
| C | 2.57938600  | -1.96635700 | -1.13351300 |
| H | 1.64576300  | -0.03617500 | -1.07569000 |
| C | 2.75274500  | -3.20959700 | -0.51790000 |
| H | 2.19746600  | -4.40471300 | 1.18559400  |
| H | 3.08815500  | -1.75785200 | -2.07118100 |
| C | 0.49839000  | 1.55979400  | 0.65316700  |
| C | -0.12659500 | 2.12847100  | -0.46175300 |
| C | 1.60710000  | 2.21168000  | 1.20997400  |
| C | 0.35391900  | 3.31682900  | -1.01269600 |
| H | -0.98943200 | 1.64354700  | -0.90844500 |
| C | 2.09554200  | 3.39063700  | 0.65308200  |
| H | 2.09670400  | 1.79057900  | 2.08478200  |
| C | 1.46740900  | 3.94747300  | -0.46093500 |

|   |             |             |             |
|---|-------------|-------------|-------------|
| H | -0.14071400 | 3.74595000  | -1.87872300 |
| H | 2.96038000  | 3.87762200  | 1.09275100  |
| C | 3.66437800  | -4.25368400 | -1.11032800 |
| H | 3.82217600  | -4.08448000 | -2.17847400 |
| H | 4.64431200  | -4.23125000 | -0.62125200 |
| H | 3.25371500  | -5.25834800 | -0.97648200 |
| H | -5.16161000 | -0.89303700 | -0.93512900 |
| H | 1.84245900  | 4.86928700  | -0.89446800 |

50

Me<sub>3</sub>Si-PPh<sub>2</sub>(*p*-tol)<sup>+</sup>. Gibbs free energy: -1484.138497

|    |             |             |             |
|----|-------------|-------------|-------------|
| P  | -0.01198100 | 0.00553400  | 0.42698200  |
| C  | 0.55053000  | -1.60519500 | -0.18724200 |
| C  | 1.51827400  | -1.69290900 | -1.19179200 |
| C  | -0.02029900 | -2.77071600 | 0.33963900  |
| C  | 1.91086200  | -2.94270100 | -1.66556900 |
| H  | 1.96465300  | -0.79571400 | -1.60771500 |
| C  | 0.37464600  | -4.01451200 | -0.13994400 |
| H  | -0.78041900 | -2.71677400 | 1.11313100  |
| C  | 1.34127500  | -4.10084600 | -1.14186000 |
| H  | 2.66204500  | -3.00756300 | -2.44520700 |
| H  | -0.07146700 | -4.91416900 | 0.26967600  |
| C  | 1.12777800  | 1.27060600  | -0.19666900 |
| C  | 2.41189600  | 1.36012700  | 0.35576600  |
| C  | 0.74514600  | 2.13744600  | -1.22375400 |
| C  | 3.30541700  | 2.31394900  | -0.11825600 |
| H  | 2.72633600  | 0.68250000  | 1.14389600  |
| C  | 1.64547500  | 3.09163900  | -1.69273700 |
| H  | -0.24585900 | 2.07061500  | -1.66025100 |
| C  | 2.92101500  | 3.18166600  | -1.14077000 |
| H  | 4.29833200  | 2.38128400  | 0.31280000  |
| H  | 1.34626000  | 3.76451400  | -2.48906400 |
| C  | -1.65284100 | 0.32768700  | -0.26483000 |
| C  | -2.20336800 | -0.50672400 | -1.23980000 |
| C  | -2.38018400 | 1.43938200  | 0.18148500  |
| C  | -3.46505400 | -0.22983500 | -1.75848100 |
| H  | -1.65816500 | -1.37341100 | -1.59860400 |
| C  | -3.63525400 | 1.70675100  | -0.34681000 |
| H  | -1.97080400 | 2.10839400  | 0.93279200  |
| C  | -4.19890500 | 0.87747500  | -1.32553600 |
| H  | -3.88206700 | -0.88982600 | -2.51318400 |
| H  | -4.18731500 | 2.57187900  | 0.00811000  |
| C  | -5.55124500 | 1.19054600  | -1.90728500 |
| H  | -6.23737200 | 1.55454800  | -1.13810600 |
| H  | -5.46486100 | 1.97355900  | -2.66816800 |
| H  | -5.99414400 | 0.31142600  | -2.38039900 |
| Si | -0.08115700 | 0.03231800  | 2.75806800  |
| C  | 0.14172900  | 1.82522500  | 3.23472900  |
| H  | 0.21568600  | 1.88293700  | 4.32631900  |

|   |             |             |             |
|---|-------------|-------------|-------------|
| H | 1.05747800  | 2.24750500  | 2.81183500  |
| H | -0.70376900 | 2.44519000  | 2.92416800  |
| C | 1.32768800  | -1.05983700 | 3.32015100  |
| H | 1.24697500  | -1.18630500 | 4.40541400  |
| H | 1.28442500  | -2.05106600 | 2.86087800  |
| H | 2.30475100  | -0.61791600 | 3.10711300  |
| C | -1.76241700 | -0.64828700 | 3.20831600  |
| H | -1.89475000 | -0.53917300 | 4.29039300  |
| H | -2.56991400 | -0.10229600 | 2.71261900  |
| H | -1.86028800 | -1.71005600 | 2.96587100  |
| H | 3.61884700  | 3.92750700  | -1.50664600 |
| H | 1.64960200  | -5.07206600 | -1.51448300 |

33

PPh<sub>2</sub>*i*-Pr. Gibbs free energy: -922.7895

|   |             |             |             |
|---|-------------|-------------|-------------|
| P | -0.00429900 | -0.04645300 | 1.46143100  |
| C | -1.65923200 | -0.31935800 | 0.68972200  |
| C | -1.88252300 | -0.97941800 | -0.52534500 |
| C | -2.76654600 | 0.19130300  | 1.38122100  |
| C | -3.17185900 | -1.11803000 | -1.03696700 |
| H | -1.05261500 | -1.39491200 | -1.08821900 |
| C | -4.05536900 | 0.06587800  | 0.86647600  |
| H | -2.61897500 | 0.69350900  | 2.33419400  |
| C | -4.26140000 | -0.59148300 | -0.34543000 |
| H | -3.32262500 | -1.63391500 | -1.98026900 |
| H | -4.89814200 | 0.47467400  | 1.41521400  |
| C | 0.51280100  | 1.53221000  | 0.65205000  |
| C | 0.25666700  | 1.82839200  | -0.69300800 |
| C | 1.24154100  | 2.45211900  | 1.41428200  |
| C | 0.72600800  | 3.00965000  | -1.26219300 |
| H | -0.31703600 | 1.13651700  | -1.30346000 |
| C | 1.71627100  | 3.63488300  | 0.84632700  |
| H | 1.44266400  | 2.24209500  | 2.46152000  |
| C | 1.45967500  | 3.91467400  | -0.49384300 |
| H | 0.52059300  | 3.22337600  | -2.30671000 |
| H | 2.28376300  | 4.33484700  | 1.45175600  |
| H | -5.26442100 | -0.69809400 | -0.74661400 |
| H | 1.82691000  | 4.83412500  | -0.93913700 |
| C | 1.10571100  | -1.25958200 | 0.56855400  |
| C | 0.75015200  | -2.69621300 | 0.96569000  |
| C | 2.57073500  | -0.95005700 | 0.89610500  |
| H | 0.96918600  | -1.13501600 | -0.51284600 |
| H | -0.29141300 | -2.94430100 | 0.74139300  |
| H | 1.38840300  | -3.40295200 | 0.42466200  |
| H | 0.91112200  | -2.85258000 | 2.03834400  |
| H | 2.85849200  | 0.05436500  | 0.57236600  |
| H | 2.75943500  | -1.02963600 | 1.97293100  |
| H | 3.22375300  | -1.66758300 | 0.38804800  |

46

Me<sub>3</sub>Si-PPH<sub>2</sub>*i*-Pr<sup>+</sup>. Gibbs free energy: -1331.780338

|    |             |             |             |
|----|-------------|-------------|-------------|
| P  | 0.02488200  | 0.26468500  | 0.38437500  |
| C  | -1.45391100 | -0.76068200 | 0.12777300  |
| C  | -2.43242500 | -0.93004000 | 1.11119400  |
| C  | -1.60721600 | -1.38421900 | -1.11836300 |
| C  | -3.55849300 | -1.70657100 | 0.84384000  |
| H  | -2.33261200 | -0.47413800 | 2.08933500  |
| C  | -2.73199100 | -2.15802300 | -1.37827900 |
| H  | -0.84151100 | -1.28804500 | -1.88211900 |
| C  | -3.71187800 | -2.31588100 | -0.39836100 |
| H  | -4.31337500 | -1.83397100 | 1.61222600  |
| H  | -2.84118600 | -2.63946100 | -2.34397300 |
| C  | 1.45148600  | -0.81122700 | 0.06876200  |
| C  | 1.38034000  | -2.17129700 | 0.39272600  |
| C  | 2.64019400  | -0.27817100 | -0.44103500 |
| C  | 2.49188800  | -2.98715800 | 0.20542000  |
| H  | 0.46221100  | -2.59695900 | 0.78557700  |
| C  | 3.74835900  | -1.09961400 | -0.62698200 |
| H  | 2.71807900  | 0.77417300  | -0.69296800 |
| C  | 3.67430000  | -2.45323600 | -0.30499200 |
| H  | 2.43101800  | -4.04106200 | 0.45457300  |
| H  | 4.66543300  | -0.68063400 | -1.02655800 |
| H  | -4.59121300 | -2.91753500 | -0.60281500 |
| H  | 4.53764900  | -3.09322300 | -0.45377300 |
| C  | 0.09303400  | 0.80459200  | 2.15353000  |
| C  | -0.90417000 | 1.93440600  | 2.44386300  |
| C  | 1.51903100  | 1.20220100  | 2.55333300  |
| H  | -0.18651400 | -0.09077400 | 2.72188000  |
| H  | -1.91724900 | 1.72057500  | 2.09488800  |
| H  | -0.95136600 | 2.09353700  | 3.52424600  |
| H  | -0.57777700 | 2.87357100  | 1.98814100  |
| H  | 2.22447300  | 0.37632600  | 2.44217600  |
| H  | 1.88446800  | 2.05291000  | 1.96986600  |
| H  | 1.51125100  | 1.50161400  | 3.60493600  |
| Si | -0.10541800 | 2.04168700  | -1.11586700 |
| C  | 1.11240400  | 3.36057700  | -0.58981900 |
| H  | 1.02432800  | 4.18736100  | -1.30382900 |
| H  | 0.89683500  | 3.75872900  | 0.40494500  |
| H  | 2.15031600  | 3.01773300  | -0.61149900 |
| C  | -1.88460200 | 2.60073600  | -0.99872400 |
| H  | -2.05969000 | 3.34347000  | -1.78497800 |
| H  | -2.57934700 | 1.77071000  | -1.15794000 |
| H  | -2.10984000 | 3.06876000  | -0.03734900 |
| C  | 0.30035700  | 1.31802600  | -2.79158600 |
| H  | -0.48567300 | 0.64475700  | -3.14358700 |
| H  | 0.36964400  | 2.14724300  | -3.50466600 |
| H  | 1.25403800  | 0.78391700  | -2.80403300 |

44

PPh<sub>2</sub>(*o*-biphenyl). Gibbs free energy: -1266.781078

|   |             |             |             |
|---|-------------|-------------|-------------|
| P | -0.45016200 | 0.00777000  | -0.80191100 |
| C | -0.23869900 | 1.58063600  | 0.13367200  |
| C | -0.22923500 | 1.66085900  | 1.53091300  |
| C | -0.05988000 | 2.75189700  | -0.61069700 |
| C | -0.04441500 | 2.88549800  | 2.16873800  |
| H | -0.35851000 | 0.76054900  | 2.12489300  |
| C | 0.11800800  | 3.97950600  | 0.02493600  |
| H | -0.04799500 | 2.70306400  | -1.69665000 |
| C | 0.12942800  | 4.04775800  | 1.41729900  |
| H | -0.03600500 | 2.93261100  | 3.25339000  |
| H | 0.25883000  | 4.87917000  | -0.56589300 |
| H | 0.27680400  | 5.00116600  | 1.91481700  |
| C | 0.05016900  | -1.25289000 | 0.45772600  |
| C | 1.41813700  | -1.56909200 | 0.58942500  |
| C | -0.88002800 | -1.94242200 | 1.24468900  |
| C | 1.81226500  | -2.55691800 | 1.49701500  |
| C | -0.47558200 | -2.92360300 | 2.14697700  |
| H | -1.93710800 | -1.71548100 | 1.15008000  |
| C | 0.87554600  | -3.23357600 | 2.27401600  |
| H | 2.86882100  | -2.79022100 | 1.59340800  |
| H | -1.21624400 | -3.44275300 | 2.74707000  |
| H | 1.20091400  | -3.99697000 | 2.97351600  |
| C | -2.28409400 | -0.18452100 | -0.82124200 |
| C | -3.16832600 | 0.58479700  | -0.05671300 |
| C | -2.81141500 | -1.15465400 | -1.68477800 |
| C | -4.54509700 | 0.38295600  | -0.14818300 |
| H | -2.78595800 | 1.34602400  | 0.61584700  |
| C | -4.18540800 | -1.36666700 | -1.76701600 |
| H | -2.14186700 | -1.75255800 | -2.29835500 |
| C | -5.05660900 | -0.59446400 | -0.99961100 |
| H | -5.21685600 | 0.99075500  | 0.45010700  |
| H | -4.57490700 | -2.12514300 | -2.43879600 |
| H | -6.12858200 | -0.74999400 | -1.07000700 |
| C | 2.47049400  | -0.87865800 | -0.21619300 |
| C | 3.06795300  | -1.53062700 | -1.30065400 |
| C | 2.89263000  | 0.41334700  | 0.11350600  |
| C | 4.05412200  | -0.89549600 | -2.05278700 |
| H | 2.75072500  | -2.53733200 | -1.55816000 |
| C | 3.87831900  | 1.04975200  | -0.63830000 |
| H | 2.44297000  | 0.92405500  | 0.95936900  |
| C | 4.45840400  | 0.39901100  | -1.72611800 |
| H | 4.50344800  | -1.40932500 | -2.89692800 |
| H | 4.19012000  | 2.05565400  | -0.37445500 |
| H | 5.22370100  | 0.89560100  | -2.31431500 |

57

Me<sub>3</sub>Si-PPh<sub>2</sub>(*o*-biphenyl)<sup>+</sup>. Gibbs free energy: -1675.767643

|   |            |            |            |
|---|------------|------------|------------|
| P | 0.61684100 | 0.02061400 | 0.06160200 |
|---|------------|------------|------------|

|    |             |             |             |
|----|-------------|-------------|-------------|
| C  | 0.43753700  | 1.64953200  | -0.71387700 |
| C  | 0.29939500  | 1.74332500  | -2.10329500 |
| C  | 0.48133700  | 2.81032500  | 0.06472200  |
| C  | 0.19001500  | 2.99297200  | -2.70451200 |
| H  | 0.26583300  | 0.84662300  | -2.71446700 |
| C  | 0.37212900  | 4.05771200  | -0.54328100 |
| H  | 0.60843600  | 2.75696800  | 1.14093700  |
| C  | 0.22203100  | 4.14914600  | -1.92558400 |
| H  | 0.07520000  | 3.06295500  | -3.78072900 |
| H  | 0.40238100  | 4.95550600  | 0.06443100  |
| H  | 0.12978900  | 5.12185600  | -2.39698000 |
| C  | -0.13171300 | -1.23064300 | -1.03753400 |
| C  | -1.52015200 | -1.47576400 | -1.08274800 |
| C  | 0.73200000  | -1.97376300 | -1.85536100 |
| C  | -1.98359900 | -2.49538000 | -1.92284600 |
| C  | 0.24502800  | -2.96916300 | -2.69360800 |
| H  | 1.79823800  | -1.78063800 | -1.83984300 |
| C  | -1.11879300 | -3.24014500 | -2.71666900 |
| H  | -3.05095000 | -2.68800000 | -1.96256600 |
| H  | 0.93139800  | -3.53035800 | -3.31789900 |
| H  | -1.51285700 | -4.01959000 | -3.36012400 |
| C  | 2.40283900  | -0.33508900 | 0.11908800  |
| C  | 3.34039400  | 0.62263800  | -0.27195900 |
| C  | 2.83490000  | -1.56477200 | 0.63539700  |
| C  | 4.70221800  | 0.35133100  | -0.14552400 |
| H  | 3.02078300  | 1.57772500  | -0.67473100 |
| C  | 4.19328100  | -1.82916900 | 0.75720500  |
| H  | 2.11723700  | -2.32455700 | 0.93021300  |
| C  | 5.12910000  | -0.86909500 | 0.36952800  |
| H  | 5.42644700  | 1.09804100  | -0.45255700 |
| H  | 4.52113600  | -2.78310800 | 1.15594500  |
| H  | 6.18955600  | -1.07484400 | 0.46999100  |
| C  | -2.55701000 | -0.71131900 | -0.32844700 |
| C  | -3.40143200 | -1.38952700 | 0.56051200  |
| C  | -2.80697800 | 0.63893900  | -0.59996500 |
| C  | -4.46471800 | -0.73081600 | 1.17139800  |
| H  | -3.23031600 | -2.44257000 | 0.76409100  |
| C  | -3.87368400 | 1.29699500  | 0.00942500  |
| H  | -2.19204300 | 1.17150700  | -1.31687100 |
| C  | -4.70549800 | 0.61500500  | 0.89427000  |
| H  | -5.10805100 | -1.27102700 | 1.85815400  |
| H  | -4.05723100 | 2.34231800  | -0.21650000 |
| H  | -5.53832500 | 1.12703100  | 1.36505800  |
| Si | -0.03613500 | -0.05511900 | 2.31376100  |
| C  | -0.36212400 | -1.86844400 | 2.63230700  |
| H  | 0.56839100  | -2.43813100 | 2.70154500  |
| H  | -0.88098400 | -1.95768600 | 3.59301500  |
| H  | -0.99582400 | -2.32129500 | 1.86598400  |

|   |             |             |            |
|---|-------------|-------------|------------|
| C | 1.48508500  | 0.56403000  | 3.21224500 |
| H | 1.72058900  | 1.60469800  | 2.97099000 |
| H | 1.27527500  | 0.51048700  | 4.28672400 |
| H | 2.36716800  | -0.04760800 | 3.00727200 |
| C | -1.50510200 | 1.04880000  | 2.62062000 |
| H | -1.42938700 | 2.01472900  | 2.11614900 |
| H | -2.43766400 | 0.57164200  | 2.31699400 |
| H | -1.54987700 | 1.23381300  | 3.70005500 |

34

$P(p\text{-F-Ph})_3$ . Gibbs free energy: -1333.536838

|   |             |             |             |
|---|-------------|-------------|-------------|
| P | 0.07264100  | 0.03480500  | 1.44101100  |
| C | 1.67836100  | -0.16884600 | 0.56199700  |
| C | 2.02493000  | 0.51430100  | -0.60873600 |
| C | 2.60240100  | -1.06544000 | 1.11607500  |
| C | 3.25858100  | 0.30716700  | -1.22260200 |
| H | 1.33094800  | 1.21863700  | -1.05561900 |
| C | 3.83425400  | -1.29717300 | 0.51113600  |
| H | 2.36067400  | -1.59555500 | 2.03338900  |
| C | 4.13379200  | -0.59993900 | -0.64889200 |
| H | 3.53509200  | 0.83407500  | -2.12887100 |
| H | 4.55149100  | -1.99367500 | 0.93026200  |
| C | -0.63407700 | 1.52244800  | 0.61595300  |
| C | -0.38867500 | 2.76574600  | 1.21279500  |
| C | -1.38969800 | 1.48040300  | -0.56189900 |
| C | -0.86378700 | 3.94520000  | 0.64538900  |
| H | 0.18077600  | 2.82038700  | 2.13653200  |
| C | -1.88220200 | 2.64726600  | -1.14094800 |
| H | -1.59897200 | 0.52937900  | -1.04147800 |
| C | -1.60291500 | 3.85566000  | -0.52315000 |
| H | -0.67731700 | 4.91067800  | 1.10153900  |
| H | -2.46697500 | 2.62350700  | -2.05361700 |
| C | -0.94176900 | -1.31217000 | 0.69828900  |
| C | -0.56127100 | -2.06772500 | -0.41594300 |
| C | -2.17593300 | -1.58312000 | 1.30494800  |
| C | -1.39188000 | -3.06590900 | -0.92275900 |
| H | 0.39102200  | -1.88393400 | -0.90301200 |
| C | -3.02586900 | -2.56541600 | 0.80629600  |
| H | -2.48545100 | -1.01809300 | 2.18015100  |
| C | -2.60919600 | -3.28786100 | -0.30110500 |
| H | -1.10402700 | -3.65702900 | -1.78490500 |
| H | -3.98393900 | -2.77506800 | 1.26803700  |
| F | 5.33305000  | -0.81022700 | -1.24066400 |
| F | -2.07722900 | 4.99432000  | -1.08044500 |
| F | -3.42252000 | -4.25342500 | -0.79025400 |

47

$\text{Me}_3\text{Si-P}(p\text{-F-Ph})_3^+$ . Gibbs free energy: -1742.521915

|   |             |             |             |
|---|-------------|-------------|-------------|
| P | -0.00202200 | -0.00905100 | 0.39098700  |
| C | 0.81721900  | -1.48442200 | -0.26543900 |



|    |             |             |             |
|----|-------------|-------------|-------------|
| C  | 1.73342100  | -1.38749800 | -1.31789500 |
| C  | 0.51758100  | -2.73730800 | 0.28628200  |
| C  | 2.35143700  | -2.52953000 | -1.81530200 |
| H  | 1.97149800  | -0.42533600 | -1.75824200 |
| C  | 1.12638200  | -3.88497000 | -0.20307300 |
| H  | -0.20156700 | -2.83504900 | 1.09333600  |
| C  | 2.03485200  | -3.75189400 | -1.24384700 |
| H  | 3.06662700  | -2.47569500 | -2.62738300 |
| H  | 0.90964500  | -4.86137900 | 0.21317800  |
| C  | 0.88364500  | 1.44304000  | -0.23146100 |
| C  | 2.15843500  | 1.72235000  | 0.27989600  |
| C  | 0.32509400  | 2.27752300  | -1.20437300 |
| C  | 2.87250600  | 2.82314100  | -0.17225300 |
| H  | 2.61367300  | 1.07927500  | 1.02636500  |
| C  | 1.02958800  | 3.38589300  | -1.66332000 |
| H  | -0.65804000 | 2.07286200  | -1.61403300 |
| C  | 2.28659600  | 3.63304100  | -1.13516000 |
| H  | 3.85932600  | 3.05306400  | 0.21103400  |
| H  | 0.61492200  | 4.04603000  | -2.41580000 |
| C  | -1.69445900 | 0.03462900  | -0.25244000 |
| C  | -2.11935200 | -0.87565100 | -1.22511000 |
| C  | -2.58777700 | 0.99472900  | 0.24265800  |
| C  | -3.42505300 | -0.83236000 | -1.70248000 |
| H  | -1.43962200 | -1.62383400 | -1.61807600 |
| C  | -3.89218400 | 1.05038400  | -0.22886800 |
| H  | -2.27479600 | 1.71676800  | 0.99025200  |
| C  | -4.28165600 | 0.12991000  | -1.19218900 |
| H  | -3.77317500 | -1.53081100 | -2.45406200 |
| H  | -4.59623700 | 1.78669900  | 0.13972300  |
| F  | 2.63405900  | -4.85860300 | -1.71791000 |
| F  | 2.97040400  | 4.70452100  | -1.57499700 |
| F  | -5.54597900 | 0.17483100  | -1.64858300 |
| Si | -0.01465300 | -0.01769500 | 2.72739400  |
| C  | -1.51612000 | -1.02089800 | 3.20611600  |
| H  | -1.66175000 | -0.91776700 | 4.28703900  |
| H  | -2.42234600 | -0.66386000 | 2.70910800  |
| H  | -1.39216000 | -2.08487500 | 2.98748100  |
| C  | 1.59979300  | -0.80971500 | 3.23393400  |
| H  | 1.57867600  | -0.95290300 | 4.32000300  |
| H  | 1.74194500  | -1.78865400 | 2.76820700  |
| H  | 2.46311000  | -0.18146200 | 2.99898300  |
| C  | -0.14029100 | 1.78207300  | 3.21050400  |
| H  | 0.01287700  | 1.85397000  | 4.29293200  |
| H  | 0.62389600  | 2.39250200  | 2.72149500  |
| H  | -1.12310700 | 2.20530400  | 2.98680200  |

52

P(1-naphthyl)<sub>3</sub>. Gibbs free energy: -1496.522113

|   |            |             |            |
|---|------------|-------------|------------|
| P | 0.12963700 | -0.74349000 | 0.12147700 |
|---|------------|-------------|------------|

|   |             |             |             |
|---|-------------|-------------|-------------|
| C | 0.53949400  | 0.05558500  | -1.48797600 |
| C | -0.16851500 | 1.24995600  | -1.85801300 |
| C | 1.45383000  | -0.48314600 | -2.36655000 |
| C | -1.11926600 | 1.87692000  | -1.00525900 |
| C | 0.09967300  | 1.85325700  | -3.12133100 |
| C | 1.70657200  | 0.11170000  | -3.62611700 |
| H | 1.99976300  | -1.38163700 | -2.09653800 |
| C | -1.76315800 | 3.02945100  | -1.38250400 |
| H | -1.34322100 | 1.43625900  | -0.03877500 |
| C | -0.58292000 | 3.04581000  | -3.48553800 |
| C | 1.04708400  | 1.25419400  | -3.99499500 |
| H | 2.43215000  | -0.34324700 | -4.29279700 |
| C | -1.49273800 | 3.62469300  | -2.63707100 |
| H | -2.48539200 | 3.48692800  | -0.71383800 |
| H | -0.36855400 | 3.49444900  | -4.45160500 |
| H | 1.24039700  | 1.71893700  | -4.95773000 |
| H | -2.00605300 | 4.53676500  | -2.92419700 |
| C | 1.05877000  | 0.30217600  | 1.32423300  |
| C | 0.80844600  | 0.12710900  | 2.72789200  |
| C | 1.94878700  | 1.27126100  | 0.91568200  |
| C | -0.08903300 | -0.85328400 | 3.23595000  |
| C | 1.49527800  | 0.95608800  | 3.66311100  |
| C | 2.61992200  | 2.09874700  | 1.84676600  |
| H | 2.14949200  | 1.41070600  | -0.14170200 |
| C | -0.29208000 | -1.00053300 | 4.58609600  |
| H | -0.62935400 | -1.49261800 | 2.54460900  |
| C | 1.26534600  | 0.77996000  | 5.05469200  |
| C | 2.40111300  | 1.94321900  | 3.19001100  |
| H | 3.31395800  | 2.85117300  | 1.48629400  |
| C | 0.39312800  | -0.17627500 | 5.50965500  |
| H | -0.98586900 | -1.75280200 | 4.94777700  |
| H | 1.79731100  | 1.41888900  | 5.75417500  |
| H | 2.91771300  | 2.57071300  | 3.91095700  |
| H | 0.22554200  | -0.30357900 | 6.57428800  |
| C | 1.13803600  | -2.28706600 | 0.08464000  |
| C | 0.63326900  | -3.42726300 | -0.62974000 |
| C | 2.32096700  | -2.40202000 | 0.78206300  |
| C | -0.56945900 | -3.39169000 | -1.38907600 |
| C | 1.37057600  | -4.64741100 | -0.59817900 |
| C | 3.04418800  | -3.61788700 | 0.81808900  |
| H | 2.71877500  | -1.54767800 | 1.31982000  |
| C | -1.01379600 | -4.49807200 | -2.07064800 |
| H | -1.14886900 | -2.47436900 | -1.42981600 |
| C | 0.88498100  | -5.77646300 | -1.31193100 |
| C | 2.58027700  | -4.71615000 | 0.14423100  |
| H | 3.97074800  | -3.66866700 | 1.38089100  |
| C | -0.27970800 | -5.70699600 | -2.03371600 |
| H | -1.93652700 | -4.44590500 | -2.63982000 |

|   |             |             |             |
|---|-------------|-------------|-------------|
| H | 1.45589400  | -6.70026400 | -1.27626900 |
| H | 3.13006700  | -5.65296100 | 0.16559400  |
| H | -0.64146700 | -6.57538000 | -2.57483900 |

65

Me<sub>3</sub>Si-P(1-naphthyl)<sub>3</sub><sup>+</sup>. Gibbs free energy: -1905.505543

|   |             |             |             |
|---|-------------|-------------|-------------|
| P | 0.27412700  | -0.44818600 | 0.08555100  |
| C | 0.59511400  | 0.13096200  | -1.61429700 |
| C | 0.03783800  | 1.35608300  | -2.11256000 |
| C | 1.36096900  | -0.66562400 | -2.44013000 |
| C | -0.68421400 | 2.27664700  | -1.30914100 |
| C | 0.24035100  | 1.68030200  | -3.48535000 |
| C | 1.57695800  | -0.32059400 | -3.79171600 |
| H | 1.80427500  | -1.58108900 | -2.06530400 |
| C | -1.21554700 | 3.42449500  | -1.84251000 |
| H | -0.80045900 | 2.09550300  | -0.24710800 |
| C | -0.32334900 | 2.87340700  | -4.01166600 |
| C | 1.01349200  | 0.81695000  | -4.30581000 |
| H | 2.18100700  | -0.97028700 | -4.41487100 |
| C | -1.04409100 | 3.72446100  | -3.21321100 |
| H | -1.76518900 | 4.10843200  | -1.20431600 |
| H | -0.16750800 | 3.10075000  | -5.06200100 |
| H | 1.15928500  | 1.07883400  | -5.34953000 |
| H | -1.47127700 | 4.63246700  | -3.62498200 |
| C | 1.17036000  | 0.65144300  | 1.23046500  |
| C | 1.03593000  | 0.51418000  | 2.65285300  |
| C | 1.94888300  | 1.66040700  | 0.70325900  |
| C | 0.33065700  | -0.54729800 | 3.27792300  |
| C | 1.66723400  | 1.48096700  | 3.48744500  |
| C | 2.58991300  | 2.59868700  | 1.54146900  |
| H | 2.07383400  | 1.75743200  | -0.36926900 |
| C | 0.21808500  | -0.62135800 | 4.64386900  |
| H | -0.10314600 | -1.33896200 | 2.67815400  |
| C | 1.52992600  | 1.38279200  | 4.89800200  |
| C | 2.43607300  | 2.52054100  | 2.90011700  |
| H | 3.19078700  | 3.38359000  | 1.09621200  |
| C | 0.81485600  | 0.36014800  | 5.46752200  |
| H | -0.32393800 | -1.44660100 | 5.09376100  |
| H | 2.01019800  | 2.13254700  | 5.51969400  |
| H | 2.91090500  | 3.24952900  | 3.55007500  |
| H | 0.71657100  | 0.29182700  | 6.54551200  |
| C | 0.99794600  | -2.11527700 | 0.23591300  |
| C | 0.41971300  | -3.24323100 | -0.43687500 |
| C | 2.10418700  | -2.28269600 | 1.04223700  |
| C | -0.65815300 | -3.14419300 | -1.35527100 |
| C | 0.97694900  | -4.53202200 | -0.19435000 |
| C | 2.66242600  | -3.56152200 | 1.25635800  |
| H | 2.56005300  | -1.43131400 | 1.53504900  |
| C | -1.18386500 | -4.25882300 | -1.95955100 |

|    |             |             |             |
|----|-------------|-------------|-------------|
| H  | -1.06259800 | -2.17308100 | -1.61620200 |
| C  | 0.40983200  | -5.66896300 | -0.82990100 |
| C  | 2.09938200  | -4.66163000 | 0.66596400  |
| H  | 3.52957600  | -3.66023500 | 1.89951000  |
| C  | -0.65229800 | -5.54029700 | -1.68820900 |
| H  | -2.00580700 | -4.15286200 | -2.65987200 |
| H  | 0.84141000  | -6.64499400 | -0.62930500 |
| H  | 2.51418800  | -5.65028300 | 0.83843800  |
| H  | -1.07760100 | -6.41432600 | -2.16948400 |
| Si | -2.05204700 | -0.46283700 | 0.58642400  |
| C  | -2.39274200 | 1.04878500  | 1.63817000  |
| H  | -3.32831300 | 0.85127800  | 2.17432200  |
| H  | -1.61778800 | 1.24065200  | 2.38423500  |
| H  | -2.54120400 | 1.94993800  | 1.03856700  |
| C  | -2.97241200 | -0.40075300 | -1.04402200 |
| H  | -3.95164900 | 0.04670900  | -0.83871500 |
| H  | -2.48143000 | 0.21522500  | -1.80111100 |
| H  | -3.14200800 | -1.39965300 | -1.45380700 |
| C  | -2.41120100 | -2.04338900 | 1.52582300  |
| H  | -2.24928800 | -1.92241900 | 2.59972500  |
| H  | -3.47335800 | -2.26602000 | 1.37194000  |
| H  | -1.83900600 | -2.90484800 | 1.17351400  |

34

PPh<sub>2</sub>(C<sub>6</sub>F<sub>5</sub>). Gibbs free energy: -1531.94085

|   |             |             |             |
|---|-------------|-------------|-------------|
| P | -0.82990300 | 0.18780100  | -1.24479100 |
| C | -1.65651000 | 1.49877500  | -0.25755600 |
| C | -1.15442300 | 2.05477600  | 0.92311900  |
| C | -2.87107600 | 1.97904700  | -0.76761000 |
| C | -1.85605700 | 3.06095700  | 1.58514000  |
| H | -0.21089900 | 1.71532200  | 1.33658800  |
| C | -3.57957200 | 2.97355300  | -0.09821800 |
| H | -3.26923300 | 1.57167200  | -1.69365700 |
| C | -3.07119600 | 3.51880900  | 1.08008400  |
| H | -1.44998100 | 3.48536600  | 2.49784400  |
| H | -4.52075500 | 3.33031200  | -0.50420600 |
| H | -3.61607600 | 4.30174500  | 1.59791400  |
| C | 0.84796600  | 0.09220400  | -0.46428300 |
| C | 1.92907100  | 0.60676800  | -1.18135700 |
| C | 1.15582600  | -0.48908600 | 0.76758000  |
| C | 3.23762400  | 0.54315700  | -0.72257500 |
| C | 2.45479900  | -0.57487300 | 1.24936100  |
| C | 3.50109300  | -0.05524700 | 0.50045000  |
| C | -1.60748500 | -1.36779900 | -0.63732900 |
| C | -2.66432200 | -1.40445900 | 0.27610800  |
| C | -1.14458000 | -2.56785400 | -1.19184000 |
| C | -3.23767800 | -2.62201800 | 0.63951600  |
| H | -3.03713600 | -0.48588400 | 0.71837800  |
| C | -1.70557700 | -3.78500500 | -0.81403100 |

|   |             |             |             |
|---|-------------|-------------|-------------|
| H | -0.33742700 | -2.55587900 | -1.92044000 |
| C | -2.75683100 | -3.81453800 | 0.10188600  |
| H | -4.05573900 | -2.63721400 | 1.35295100  |
| H | -1.32781000 | -4.70774700 | -1.24306100 |
| H | -3.20187400 | -4.76133900 | 0.39090500  |
| F | 1.73273300  | 1.19686900  | -2.36648200 |
| F | 4.23820300  | 1.04907800  | -1.44540100 |
| F | 4.74816100  | -0.12524100 | 0.95630700  |
| F | 0.19395300  | -0.97727600 | 1.55685400  |
| F | 2.70350800  | -1.13858200 | 2.43294300  |

47

Me<sub>3</sub>Si-PPh<sub>2</sub>(C<sub>6</sub>F<sub>5</sub>)<sup>+</sup>. Gibbs free energy: -1940.919959

|    |             |             |             |
|----|-------------|-------------|-------------|
| P  | 0.71532200  | -0.10336600 | -0.18042900 |
| C  | 1.27767600  | -1.21814300 | 1.12991100  |
| C  | 0.42352700  | -1.63755300 | 2.15295200  |
| C  | 2.60568100  | -1.66370000 | 1.09383600  |
| C  | 0.89838000  | -2.50551700 | 3.13320200  |
| H  | -0.60497900 | -1.29500900 | 2.19654600  |
| C  | 3.07243700  | -2.52570700 | 2.07888000  |
| H  | 3.28512900  | -1.33675400 | 0.31255800  |
| C  | 2.21758200  | -2.95013000 | 3.09602500  |
| H  | 0.23277600  | -2.83214200 | 3.92456900  |
| H  | 4.10098700  | -2.86791800 | 2.04861100  |
| H  | 2.58155800  | -3.62902400 | 3.85981900  |
| C  | -1.08749500 | 0.08770000  | 0.02532300  |
| C  | -1.92908700 | -0.92544400 | -0.43790900 |
| C  | -1.70503200 | 1.18538700  | 0.63220700  |
| C  | -3.30826400 | -0.85620000 | -0.34667700 |
| C  | -3.08722500 | 1.28017900  | 0.73138300  |
| C  | -3.89042000 | 0.26104400  | 0.23898100  |
| C  | 1.49197600  | 1.51750300  | 0.04488000  |
| C  | 2.26791600  | 1.79126100  | 1.17298700  |
| C  | 1.31370200  | 2.49096200  | -0.94512800 |
| C  | 2.86273100  | 3.04316100  | 1.30867100  |
| H  | 2.40569100  | 1.04280000  | 1.94594500  |
| C  | 1.90553500  | 3.73941700  | -0.79852800 |
| H  | 0.70807900  | 2.29019500  | -1.82397100 |
| C  | 2.68151000  | 4.01502800  | 0.32758000  |
| H  | 3.46395200  | 3.25753800  | 2.18550100  |
| H  | 1.76344600  | 4.49467300  | -1.56368700 |
| H  | 3.14593900  | 4.98905200  | 0.43904300  |
| F  | -1.39438600 | -2.02442600 | -0.97922800 |
| F  | -4.06805800 | -1.84495600 | -0.80411800 |
| F  | -5.20703300 | 0.34729600  | 0.33762500  |
| F  | -0.99693800 | 2.17925600  | 1.15948300  |
| F  | -3.64258400 | 2.34025900  | 1.30901300  |
| Si | 1.30147400  | -0.92364300 | -2.31345300 |
| C  | 1.48735700  | -2.77073600 | -2.13988200 |

|   |             |             |             |
|---|-------------|-------------|-------------|
| H | 1.82358100  | -3.15809000 | -3.10854300 |
| H | 2.24364700  | -3.03365900 | -1.39580100 |
| H | 0.55167200  | -3.26918400 | -1.88098100 |
| C | 2.93402200  | -0.08292700 | -2.65771400 |
| H | 3.32557100  | -0.50304400 | -3.59125900 |
| H | 2.82369600  | 0.99552800  | -2.79190100 |
| H | 3.67905800  | -0.26156300 | -1.87749400 |
| C | -0.05485800 | -0.37246000 | -3.47172700 |
| H | 0.26124600  | -0.61737100 | -4.49200900 |
| H | -0.99980500 | -0.88666000 | -3.28256400 |
| H | -0.22661900 | 0.70652400  | -3.43009700 |

43

P(*p*-CF<sub>3</sub>-Ph)<sub>3</sub>. Gibbs free energy: -2046.781507

|   |             |             |             |
|---|-------------|-------------|-------------|
| P | -0.00747400 | 0.03033700  | -1.85805300 |
| C | 1.63210400  | -0.16787900 | -1.03692300 |
| C | 1.83301600  | -0.88535900 | 0.14690200  |
| C | 2.72980800  | 0.44782000  | -1.64994900 |
| C | 3.10047600  | -0.98120800 | 0.71152800  |
| H | 0.99903400  | -1.37279400 | 0.64108900  |
| C | 3.99865900  | 0.36461200  | -1.08682300 |
| H | 2.59706600  | 0.99714100  | -2.57752400 |
| C | 4.17990300  | -0.35034300 | 0.09568800  |
| H | 3.24077900  | -1.53676900 | 1.63217300  |
| H | 4.83916200  | 0.85007000  | -1.57023400 |
| C | -0.98115100 | -1.30794200 | -1.04447400 |
| C | -0.87916800 | -2.58963100 | -1.59999000 |
| C | -1.79434700 | -1.11981600 | 0.07682800  |
| C | -1.55339100 | -3.66586600 | -1.03582100 |
| H | -0.26362200 | -2.75424600 | -2.47983500 |
| C | -2.48232500 | -2.19041700 | 0.64061600  |
| H | -1.89228800 | -0.13721200 | 0.52621600  |
| C | -2.35378800 | -3.46240200 | 0.08778900  |
| H | -1.45664500 | -4.65378200 | -1.47229600 |
| H | -3.10482400 | -2.03097300 | 1.51402300  |
| C | -0.67077800 | 1.53342900  | -1.02116700 |
| C | -0.08489000 | 2.13452600  | 0.09693100  |
| C | -1.83251800 | 2.09806900  | -1.56283900 |
| C | -0.64999500 | 3.27097700  | 0.66774900  |
| H | 0.81580100  | 1.71862300  | 0.53562600  |
| C | -2.40991700 | 3.22563400  | -0.99078900 |
| H | -2.29612000 | 1.65326800  | -2.43881800 |
| C | -1.81481800 | 3.81040300  | 0.12632300  |
| H | -0.18589000 | 3.72568400  | 1.53597200  |
| H | -3.31323500 | 3.64722300  | -1.41718700 |
| C | -2.39577100 | 5.06693600  | 0.71242700  |
| C | 5.55838800  | -0.49706800 | 0.67807600  |
| C | -3.12498800 | -4.61338900 | 0.67141100  |
| F | -3.72621200 | 5.15870200  | 0.51869800  |

|   |             |             |            |
|---|-------------|-------------|------------|
| F | -1.85070900 | 6.17698400  | 0.15950200 |
| F | -2.18355600 | 5.16043200  | 2.04050300 |
| F | 6.35035300  | 0.55693700  | 0.39863300 |
| F | 5.53859500  | -0.63073900 | 2.01902500 |
| F | 6.19245900  | -1.59164700 | 0.19379900 |
| F | -2.48520600 | -5.79009600 | 0.51813400 |
| F | -4.33622600 | -4.75781700 | 0.08214300 |
| F | -3.35859800 | -4.46073500 | 1.98986100 |

56

Me<sub>3</sub>Si-P(*p*-CF<sub>3</sub>-Ph)<sub>3</sub><sup>+</sup>. Gibbs free energy: -2455.760363

|    |             |             |             |
|----|-------------|-------------|-------------|
| P  | -0.01825700 | 0.02528800  | 0.93231700  |
| C  | 1.07703900  | 1.31376600  | 0.27103600  |
| C  | 0.67412400  | 2.13079500  | -0.78921700 |
| C  | 2.34991100  | 1.46250800  | 0.82939400  |
| C  | 1.54408200  | 3.09429400  | -1.28418200 |
| H  | -0.30773600 | 2.02042500  | -1.23578300 |
| C  | 3.22043500  | 2.42486900  | 0.33166900  |
| H  | 2.68271400  | 0.82692200  | 1.64348200  |
| C  | 2.81127600  | 3.23766300  | -0.72153700 |
| H  | 1.23174000  | 3.72827400  | -2.10675100 |
| H  | 4.20599200  | 2.53750400  | 0.76654200  |
| C  | -1.67721300 | 0.29547600  | 0.24399600  |
| C  | -2.41674500 | 1.40439100  | 0.67617400  |
| C  | -2.21454400 | -0.58203700 | -0.69703900 |
| C  | -3.68520200 | 1.63088600  | 0.16433800  |
| H  | -2.00998100 | 2.10291700  | 1.40015200  |
| C  | -3.49082100 | -0.35618500 | -1.20687400 |
| H  | -1.65265300 | -1.44215800 | -1.04301700 |
| C  | -4.21827300 | 0.74596300  | -0.77472600 |
| H  | -4.25426300 | 2.49145000  | 0.49806500  |
| H  | -3.90542000 | -1.04012600 | -1.93730900 |
| C  | 0.58142900  | -1.57255900 | 0.31124600  |
| C  | 1.52313700  | -1.63280400 | -0.71830800 |
| C  | 0.06539000  | -2.75108900 | 0.86089800  |
| C  | 1.94496000  | -2.86783500 | -1.19804500 |
| H  | 1.93038200  | -0.72787600 | -1.15524900 |
| C  | 0.48453600  | -3.98411800 | 0.37873600  |
| H  | -0.67442500 | -2.72329700 | 1.65401600  |
| C  | 1.42236900  | -4.03663200 | -0.65060800 |
| H  | 2.67405700  | -2.91128100 | -1.99870900 |
| H  | 0.07727700  | -4.89396600 | 0.80338900  |
| Si | -0.06987900 | 0.07230700  | 3.27511200  |
| C  | 1.38032400  | -0.97111000 | 3.81666900  |
| H  | 1.31159300  | -1.09975100 | 4.90262300  |
| H  | 1.37133900  | -1.96437300 | 3.36027700  |
| H  | 2.33930200  | -0.49362400 | 3.59871800  |
| C  | 0.10581000  | 1.87687800  | 3.71855200  |
| H  | 0.17474700  | 1.94867800  | 4.80977500  |

|   |             |             |             |
|---|-------------|-------------|-------------|
| H | 1.01326700  | 2.31682800  | 3.29638100  |
| H | -0.75347200 | 2.47309800  | 3.40031200  |
| C | -1.73038200 | -0.65131700 | 3.72510400  |
| H | -1.85867400 | -0.54477700 | 4.80798900  |
| H | -2.55405200 | -0.12348400 | 3.23659400  |
| H | -1.80479700 | -1.71523600 | 3.48496800  |
| C | 1.91442200  | -5.37258500 | -1.14917300 |
| C | 3.73106500  | 4.29436000  | -1.27969700 |
| C | -5.60374000 | 1.01257400  | -1.30673600 |
| F | 1.00518800  | -6.34744100 | -0.97112200 |
| F | 3.03426300  | -5.75761800 | -0.49935300 |
| F | 2.21625900  | -5.34255100 | -2.45995300 |
| F | 4.92984700  | 4.30937900  | -0.67528900 |
| F | 3.95118000  | 4.11074000  | -2.59788200 |
| F | 3.20194300  | 5.52840100  | -1.14543300 |
| F | -5.68233500 | 2.22519100  | -1.89310300 |
| F | -6.52124600 | 1.00324100  | -0.31717400 |
| F | -5.99306200 | 0.10568300  | -2.21689000 |

48

P(<sup>t</sup>Bu)<sub>2</sub>(*o*-biphenyl). Gibbs free energy: -1119.180476

|   |             |             |             |
|---|-------------|-------------|-------------|
| P | 0.54313800  | 0.86217000  | -0.06196300 |
| C | 0.32036400  | 1.79764500  | 1.57746400  |
| C | 0.83455800  | 0.82081000  | 2.65243500  |
| C | 1.24397700  | 3.02648600  | 1.55447900  |
| C | -1.09761500 | 2.23297000  | 1.97062000  |
| H | 0.22055500  | -0.08503400 | 2.69822700  |
| H | 1.87074700  | 0.52115800  | 2.46614200  |
| H | 0.78956800  | 1.30408900  | 3.63614200  |
| H | 0.87688800  | 3.80302300  | 0.87741100  |
| H | 1.29394300  | 3.46435200  | 2.55869900  |
| H | 2.26379300  | 2.76270500  | 1.25359400  |
| H | -1.05138900 | 2.77293400  | 2.92490300  |
| H | -1.55483100 | 2.89981500  | 1.23685100  |
| H | -1.75762600 | 1.37369200  | 2.11436500  |
| C | 0.08422600  | 1.96646600  | -1.54524800 |
| C | -1.01258600 | 3.02651900  | -1.37452100 |
| C | 1.38921700  | 2.68505100  | -1.94657500 |
| C | -0.30157000 | 1.01875000  | -2.69529900 |
| H | -1.98221400 | 2.59677500  | -1.11412600 |
| H | -0.75004400 | 3.76985400  | -0.61771900 |
| H | -1.14118900 | 3.55986000  | -2.32489800 |
| H | 2.19174000  | 1.96825500  | -2.14683800 |
| H | 1.21856500  | 3.26780700  | -2.86022700 |
| H | 1.73728300  | 3.37612700  | -1.17369000 |
| H | -0.36218800 | 1.58858500  | -3.63034400 |
| H | 0.44618700  | 0.22953400  | -2.83507700 |
| H | -1.27070700 | 0.54160600  | -2.52673800 |
| C | -0.80504900 | -0.40964400 | 0.03554900  |



|   |             |             |             |
|---|-------------|-------------|-------------|
| C | -0.45123000 | -1.76458500 | 0.20418500  |
| C | -2.17097300 | -0.09125400 | -0.01625300 |
| C | -1.45312600 | -2.73474900 | 0.34462100  |
| C | 0.96726200  | -2.23701100 | 0.22457900  |
| C | -3.15998600 | -1.06098100 | 0.10405100  |
| H | -2.47508600 | 0.93958100  | -0.14915800 |
| C | -2.79964500 | -2.39294700 | 0.29557000  |
| H | -1.16286900 | -3.77253700 | 0.48139100  |
| C | 1.67754600  | -2.39039200 | -0.97050700 |
| C | 1.58639200  | -2.58371900 | 1.42774600  |
| H | -4.20626700 | -0.77581300 | 0.05427800  |
| H | -3.56043100 | -3.16036300 | 0.39830700  |
| C | 2.98706000  | -2.86342000 | -0.96159500 |
| H | 1.19918000  | -2.13177200 | -1.91082000 |
| C | 2.89981000  | -3.05273300 | 1.44024800  |
| H | 1.04181600  | -2.47477500 | 2.36119800  |
| C | 3.60434400  | -3.19172900 | 0.24588700  |
| H | 3.52509000  | -2.97629900 | -1.89782600 |
| H | 3.37125900  | -3.30897700 | 2.38407400  |
| H | 4.62595000  | -3.55887500 | 0.25442200  |

61

Me<sub>3</sub>Si-P(<sup>t</sup>Bu)<sub>2</sub>(*o*-biphenyl)<sup>+</sup>. Gibbs free energy: -1528.152075

|   |             |             |             |
|---|-------------|-------------|-------------|
| P | -0.81597600 | -0.29329000 | 0.13025100  |
| C | -0.95509900 | -0.68286800 | 1.98030800  |
| C | -1.52824900 | -2.08887900 | 2.21862100  |
| C | 0.41319800  | -0.56342200 | 2.65853200  |
| C | -1.90360800 | 0.35138600  | 2.61161900  |
| H | -2.48858900 | -2.24593300 | 1.72568800  |
| H | -0.84151400 | -2.87875000 | 1.91198000  |
| H | -1.69286200 | -2.20352500 | 3.29464000  |
| H | 1.15164500  | -1.24833600 | 2.23906500  |
| H | 0.79628700  | 0.45801800  | 2.59857200  |
| H | 0.29234800  | -0.80941300 | 3.71842400  |
| H | -1.89335600 | 0.20348100  | 3.69599200  |
| H | -1.59078700 | 1.38170800  | 2.42035300  |
| H | -2.93676800 | 0.22209200  | 2.28055200  |
| C | -0.11494100 | -1.72880500 | -0.89381000 |
| C | 0.29553800  | -1.16036600 | -2.26275700 |
| C | 1.07317500  | -2.43697600 | -0.22256100 |
| C | -1.20622400 | -2.79002300 | -1.13372100 |
| H | -0.55725100 | -0.76653100 | -2.81616200 |
| H | 1.04088400  | -0.37418800 | -2.18485300 |
| H | 0.72885300  | -1.97329900 | -2.85393600 |
| H | 0.77247700  | -2.97613400 | 0.67744900  |
| H | 1.45934200  | -3.17697200 | -0.93093300 |
| H | 1.88907800  | -1.76651500 | 0.02973500  |
| H | -0.74714300 | -3.60312700 | -1.70454000 |
| H | -1.59619800 | -3.22234400 | -0.21125300 |

|    |             |             |             |
|----|-------------|-------------|-------------|
| H  | -2.03731700 | -2.41492000 | -1.73232400 |
| Si | -3.03292100 | 0.10010600  | -0.70046200 |
| C  | -3.85063200 | 1.68239500  | -0.09223500 |
| H  | -3.56765400 | 2.55623300  | -0.68471400 |
| H  | -4.92226600 | 1.51412700  | -0.25577100 |
| H  | -3.71731700 | 1.90720500  | 0.96756800  |
| C  | -2.93444000 | 0.21049800  | -2.56645900 |
| H  | -2.74495800 | -0.74259900 | -3.06426500 |
| H  | -3.91615300 | 0.56803900  | -2.89932100 |
| H  | -2.19035200 | 0.94172600  | -2.89530300 |
| C  | -4.12972700 | -1.30169500 | -0.10606400 |
| H  | -5.07296800 | -1.18142000 | -0.65291900 |
| H  | -3.76431700 | -2.31052300 | -0.29500500 |
| H  | -4.36119000 | -1.20005100 | 0.95808300  |
| C  | 0.18414700  | 1.27513500  | -0.00517600 |
| C  | 1.58688100  | 1.48576400  | -0.09954500 |
| C  | -0.63489100 | 2.41495200  | 0.05586500  |
| C  | 2.05805500  | 2.80530700  | -0.16451200 |
| C  | 2.69598100  | 0.47731500  | -0.12854600 |
| C  | -0.14399700 | 3.71290900  | 0.00837500  |
| H  | -1.70093900 | 2.30008800  | 0.15560200  |
| C  | 1.22182100  | 3.91301800  | -0.11599100 |
| H  | 3.12988500  | 2.95253700  | -0.24897600 |
| C  | 3.28348400  | 0.03093600  | 1.05938700  |
| C  | 3.28230400  | 0.10810000  | -1.34408800 |
| H  | -0.83412000 | 4.54767700  | 0.06149700  |
| H  | 1.63978800  | 4.91246300  | -0.16910800 |
| C  | 4.36438700  | -0.84750500 | 1.03136700  |
| H  | 2.90180900  | 0.37665300  | 2.01238400  |
| C  | 4.36037000  | -0.77235400 | -1.37581800 |
| H  | 2.89943800  | 0.51787100  | -2.27339600 |
| C  | 4.89206200  | -1.26969800 | -0.18718600 |
| H  | 4.79707700  | -1.19578000 | 1.96362500  |
| H  | 4.79028200  | -1.06100200 | -2.32942600 |
| H  | 5.72779900  | -1.96145200 | -0.20992400 |

61

P(mesityl)<sub>3</sub>. Gibbs free energy: -1389.393624

|   |             |             |             |
|---|-------------|-------------|-------------|
| P | 0.02086100  | -0.00579600 | 0.98038200  |
| C | -1.68706800 | -0.37253900 | 0.39122500  |
| C | -2.06039800 | -1.27799400 | -0.62830100 |
| C | -2.70473900 | 0.27797200  | 1.13108900  |
| C | -3.41691800 | -1.52635100 | -0.85528000 |
| C | -4.04663100 | 0.01058800  | 0.85323200  |
| C | -4.42754400 | -0.90094700 | -0.12774900 |
| H | -3.69270400 | -2.22234400 | -1.64476600 |
| H | -4.81369600 | 0.53205700  | 1.42158600  |
| C | 1.17833800  | -1.29308700 | 0.34647000  |
| C | 1.12506800  | -2.51758600 | 1.06001000  |

|   |             |             |             |
|---|-------------|-------------|-------------|
| C | 2.14188300  | -1.14248000 | -0.67460300 |
| C | 2.02334400  | -3.53968800 | 0.75502600  |
| C | 3.03502900  | -2.18935100 | -0.92856300 |
| C | 3.00065600  | -3.39165800 | -0.22783200 |
| H | 1.95664100  | -4.47810300 | 1.30136100  |
| H | 3.77262600  | -2.06199600 | -1.71815000 |
| C | 0.53569500  | 1.65280600  | 0.36071800  |
| C | -0.09955600 | 2.42091400  | -0.64118500 |
| C | 1.62602200  | 2.22023200  | 1.06585700  |
| C | 0.34371800  | 3.72502500  | -0.88192500 |
| C | 2.04419200  | 3.51951000  | 0.77420300  |
| C | 1.40529900  | 4.29923300  | -0.18689100 |
| H | -0.15085900 | 4.30596200  | -1.65762000 |
| H | 2.89250700  | 3.93197700  | 1.31598200  |
| C | -5.87869300 | -1.21247300 | -0.38928300 |
| H | -6.06099900 | -1.38569100 | -1.45366200 |
| H | -6.18225400 | -2.11845700 | 0.14702000  |
| H | -6.52742000 | -0.39790400 | -0.05647500 |
| C | 3.99038100  | -4.49319400 | -0.50874000 |
| H | 4.46388400  | -4.36365100 | -1.48545600 |
| H | 4.78288400  | -4.50247800 | 0.24750600  |
| H | 3.50706400  | -5.47422900 | -0.48717600 |
| C | 1.83397700  | 5.71898800  | -0.45523300 |
| H | 1.27374600  | 6.41632300  | 0.17754400  |
| H | 2.89700600  | 5.86149300  | -0.24281600 |
| H | 1.64971000  | 5.99819100  | -1.49628100 |
| C | 2.39847500  | 1.44549900  | 2.10776400  |
| H | 1.73932800  | 1.06859500  | 2.89644000  |
| H | 2.89947400  | 0.57476400  | 1.66957500  |
| H | 3.16378800  | 2.07666600  | 2.56524200  |
| C | -1.21145500 | 1.91039300  | -1.52664700 |
| H | -0.98332500 | 0.92372300  | -1.93686500 |
| H | -2.16070000 | 1.81830200  | -0.99156300 |
| H | -1.36212200 | 2.59587300  | -2.36393400 |
| C | 2.24834000  | 0.07236400  | -1.56537200 |
| H | 1.27141600  | 0.39221500  | -1.93524700 |
| H | 2.68551600  | 0.93027700  | -1.04632700 |
| H | 2.87785600  | -0.15444800 | -2.42922500 |
| C | 0.08137800  | -2.78390400 | 2.11911600  |
| H | 0.07580000  | -2.00070700 | 2.88363500  |
| H | -0.92555100 | -2.81353300 | 1.68707100  |
| H | 0.26370500  | -3.74522500 | 2.60505400  |
| C | -1.07985500 | -1.97155200 | -1.54367900 |
| H | -0.32980100 | -1.27935200 | -1.93346800 |
| H | -0.53645400 | -2.77412600 | -1.03675100 |
| H | -1.60880900 | -2.40857000 | -2.39391200 |
| C | -2.39711700 | 1.31111700  | 2.18953400  |
| H | -1.70428800 | 0.92383100  | 2.94322700  |

|                                                                                           |             |             |             |
|-------------------------------------------------------------------------------------------|-------------|-------------|-------------|
| H                                                                                         | -1.92686500 | 2.20003700  | 1.75356900  |
| H                                                                                         | -3.31365500 | 1.63103400  | 2.69056600  |
| 74                                                                                        |             |             |             |
| Me <sub>3</sub> Si-P(mesityl) <sub>3</sub> <sup>+</sup> . Gibbs free energy: -1798.364771 |             |             |             |
| P                                                                                         | 0.01379900  | -0.00847800 | 0.96397600  |
| C                                                                                         | -1.71265900 | -0.36345900 | 0.43423300  |
| C                                                                                         | -2.04016500 | -1.34741700 | -0.53242200 |
| C                                                                                         | -2.75197900 | 0.36248900  | 1.06051200  |
| C                                                                                         | -3.38532100 | -1.65713700 | -0.73525300 |
| C                                                                                         | -4.07856300 | 0.01378300  | 0.81091600  |
| C                                                                                         | -4.42032700 | -1.01893300 | -0.05521000 |
| H                                                                                         | -3.63267800 | -2.41340500 | -1.47532600 |
| H                                                                                         | -4.86439900 | 0.58448000  | 1.29966100  |
| C                                                                                         | 1.17865900  | -1.31382700 | 0.39276300  |
| C                                                                                         | 1.08421900  | -2.58766200 | 0.99931700  |
| C                                                                                         | 2.18067300  | -1.08409100 | -0.58355400 |
| C                                                                                         | 2.05403100  | -3.55057600 | 0.72502400  |
| C                                                                                         | 3.12789900  | -2.08330100 | -0.81092000 |
| C                                                                                         | 3.10914600  | -3.30845200 | -0.14799900 |
| H                                                                                         | 1.96280000  | -4.52504900 | 1.19834400  |
| H                                                                                         | 3.89638700  | -1.90217600 | -1.55772400 |
| C                                                                                         | 0.55117200  | 1.66319900  | 0.41292300  |
| C                                                                                         | -0.16381900 | 2.42889600  | -0.54312800 |
| C                                                                                         | 1.70413500  | 2.21388600  | 1.01657900  |
| C                                                                                         | 0.21838500  | 3.75368700  | -0.75091600 |
| C                                                                                         | 2.04379100  | 3.54250700  | 0.76191600  |
| C                                                                                         | 1.29262200  | 4.34549500  | -0.08838100 |
| H                                                                                         | -0.33441900 | 4.34000000  | -1.48027800 |
| H                                                                                         | 2.93503500  | 3.94795500  | 1.23437700  |
| C                                                                                         | -5.85577400 | -1.41406200 | -0.27059800 |
| H                                                                                         | -5.99990200 | -1.87021200 | -1.25295800 |
| H                                                                                         | -6.16295900 | -2.14623100 | 0.48385900  |
| H                                                                                         | -6.52234800 | -0.55227100 | -0.18417200 |
| C                                                                                         | 4.17471200  | -4.34349600 | -0.38623600 |
| H                                                                                         | 4.63862800  | -4.21981300 | -1.36771700 |
| H                                                                                         | 4.96308700  | -4.25371800 | 0.36884300  |
| H                                                                                         | 3.76554300  | -5.35456800 | -0.31673400 |
| C                                                                                         | 1.63785900  | 5.79267600  | -0.31152600 |
| H                                                                                         | 1.03059100  | 6.43060100  | 0.33960000  |
| H                                                                                         | 2.68869800  | 5.99038400  | -0.08729600 |
| H                                                                                         | 1.43899900  | 6.09155600  | -1.34388600 |
| C                                                                                         | 2.67092200  | 1.43509600  | 1.87710500  |
| H                                                                                         | 2.54626300  | 0.35462000  | 1.81347300  |
| H                                                                                         | 3.69205700  | 1.64759600  | 1.54997700  |
| H                                                                                         | 2.60398500  | 1.73542200  | 2.92630500  |
| C                                                                                         | -1.26830300 | 1.91322100  | -1.43809900 |
| H                                                                                         | -1.07716600 | 0.90054800  | -1.79629000 |
| H                                                                                         | -2.24276500 | 1.90647800  | -0.94402300 |

|    |             |             |             |
|----|-------------|-------------|-------------|
| H  | -1.34677800 | 2.56093900  | -2.31318700 |
| C  | 2.27137200  | 0.12882800  | -1.48225200 |
| H  | 1.29436700  | 0.45224300  | -1.84623300 |
| H  | 2.73705600  | 0.98629000  | -0.99134000 |
| H  | 2.87753300  | -0.12063200 | -2.35517600 |
| C  | -0.05579200 | -3.03428000 | 1.88486500  |
| H  | -0.94451800 | -2.40766900 | 1.81720200  |
| H  | -0.36537700 | -4.03911400 | 1.58594300  |
| H  | 0.25149200  | -3.09783800 | 2.93241400  |
| C  | -1.05725400 | -2.04770900 | -1.44323700 |
| H  | -0.28226400 | -1.37554600 | -1.81538700 |
| H  | -0.55529300 | -2.88700900 | -0.95623000 |
| H  | -1.59227100 | -2.44166600 | -2.30915500 |
| C  | -2.54273800 | 1.57033200  | 1.94396200  |
| H  | -1.55413800 | 2.01965800  | 1.85502600  |
| H  | -3.25995700 | 2.34543500  | 1.66248900  |
| H  | -2.72768400 | 1.33451500  | 2.99556500  |
| Si | 0.04329900  | -0.02005500 | 3.37577900  |
| C  | 1.59268200  | -0.93075100 | 3.93749500  |
| H  | 2.33111000  | -0.22210000 | 4.32010000  |
| H  | 1.31332000  | -1.60321800 | 4.75537900  |
| H  | 2.07399400  | -1.53159500 | 3.16224300  |
| C  | 0.06563900  | 1.76698100  | 3.96913500  |
| H  | -0.90783100 | 2.04240800  | 4.38195100  |
| H  | 0.80756300  | 1.84936600  | 4.77029600  |
| H  | 0.32417500  | 2.49834900  | 3.19978100  |
| C  | -1.50795000 | -0.90649500 | 3.97007900  |
| H  | -1.25666600 | -1.90107700 | 4.34617300  |
| H  | -1.93367100 | -0.33045700 | 4.79830400  |
| H  | -2.28325300 | -1.02097800 | 3.20865100  |

9

Me<sub>2</sub>O. Gibbs free energy: -154.935743

|   |             |             |             |
|---|-------------|-------------|-------------|
| O | 0.72547000  | -1.06192000 | -0.40419400 |
| C | 1.70333000  | -0.10030500 | -0.73586000 |
| H | 2.63112800  | -0.57942600 | -1.08005700 |
| H | 1.91241400  | 0.47810600  | 0.16556700  |
| H | 1.34466500  | 0.57723000  | -1.52403800 |
| C | 0.38632600  | -1.88069700 | -1.50210400 |
| H | -0.36738100 | -2.59190500 | -1.16034500 |
| H | -0.02723100 | -1.28631500 | -2.32946400 |
| H | 1.26255900  | -2.43313700 | -1.87075800 |

22

Me<sub>3</sub>Si-OMe<sub>2</sub><sup>+</sup>. Gibbs free energy: -563.912567

|    |             |             |             |
|----|-------------|-------------|-------------|
| O  | 0.47195100  | -0.60735600 | -0.98810300 |
| C  | 1.82957400  | -0.18617900 | -0.65724400 |
| H  | 2.25513500  | -0.89075000 | 0.05839600  |
| H  | 1.76618100  | 0.81374700  | -0.23624900 |
| Si | -0.91845600 | -0.05828300 | 0.10699800  |

|   |             |             |             |
|---|-------------|-------------|-------------|
| C | -2.42938600 | -0.63988800 | -0.79744100 |
| H | -2.57133500 | -1.72173000 | -0.73336100 |
| H | -3.29637800 | -0.16624100 | -0.32340900 |
| H | -2.42133600 | -0.33502700 | -1.84790200 |
| C | -0.58518100 | -0.91555700 | 1.71789400  |
| H | 0.37788500  | -0.62168600 | 2.14498600  |
| H | -1.36559600 | -0.63470100 | 2.43349800  |
| H | -0.60842400 | -2.00354800 | 1.60808700  |
| C | -0.71681500 | 1.78583500  | 0.13258800  |
| H | 0.10334500  | 2.11587700  | 0.77528100  |
| H | -0.57229900 | 2.18954400  | -0.87359000 |
| H | -1.64092700 | 2.21573600  | 0.53469900  |
| H | 2.39798500  | -0.16734400 | -1.58549800 |
| C | 0.43231200  | -1.92126200 | -1.62220500 |
| H | -0.57603300 | -2.06988100 | -1.99780900 |
| H | 1.14107500  | -1.90141000 | -2.44817300 |
| H | 0.70281100  | -2.68063700 | -0.88739700 |

12

MeOEt. Gibbs free energy: -194.220131

|   |             |             |             |
|---|-------------|-------------|-------------|
| O | 0.73498500  | -1.04640800 | -0.40249300 |
| C | 1.71649800  | -0.08288900 | -0.74136300 |
| H | 2.62110900  | -0.59113300 | -1.11022900 |
| H | 1.34164900  | 0.55670800  | -1.55569600 |
| C | 0.39039000  | -1.87339700 | -1.49209100 |
| H | -0.36286000 | -2.58104700 | -1.14185500 |
| H | -0.02632900 | -1.28621600 | -2.32296600 |
| H | 1.26368900  | -2.43071100 | -1.86031300 |
| C | 2.03592400  | 0.74824700  | 0.48447500  |
| H | 2.79380100  | 1.49822900  | 0.24076300  |
| H | 1.14215500  | 1.26568500  | 0.84490300  |
| H | 2.42171100  | 0.11674700  | 1.28994000  |

25

Me<sub>3</sub>Si-OMeEt<sup>+</sup>. Gibbs free energy: -603.196623

|    |             |             |             |
|----|-------------|-------------|-------------|
| O  | 0.81139900  | -1.13332100 | -0.12289000 |
| C  | 2.21113600  | -0.66040400 | -0.12451900 |
| H  | 2.69282800  | -1.20701400 | 0.68353400  |
| H  | 2.62461900  | -1.00351800 | -1.07344800 |
| C  | 0.07763800  | -0.86939800 | -1.35349000 |
| H  | -0.85813100 | -1.42097700 | -1.29704700 |
| H  | -0.11002400 | 0.19988900  | -1.44489500 |
| H  | 0.67833900  | -1.24222300 | -2.18139800 |
| C  | 2.30764800  | 0.83653400  | 0.05013500  |
| H  | 3.36726300  | 1.10519900  | 0.06156100  |
| H  | 1.83450500  | 1.37856600  | -0.77119300 |
| H  | 1.86832200  | 1.16134400  | 0.99639100  |
| Si | -0.15441200 | -1.43424400 | 1.41696800  |
| C  | -1.29417600 | 0.02653900  | 1.52609100  |
| H  | -1.85936100 | -0.04344200 | 2.46197300  |

|   |             |             |            |
|---|-------------|-------------|------------|
| H | -0.74162600 | 0.97038500  | 1.53817500 |
| H | -2.01541000 | 0.04948700  | 0.70443200 |
| C | -0.98820200 | -3.05611700 | 1.07665000 |
| H | -0.25964800 | -3.81873100 | 0.78800000 |
| H | -1.47929700 | -3.38897400 | 1.99775900 |
| H | -1.75616500 | -2.98612500 | 0.30188300 |
| C | 1.12861300  | -1.51330300 | 2.75355500 |
| H | 0.59859300  | -1.71469200 | 3.69158000 |
| H | 1.84210400  | -2.32732600 | 2.59954100 |
| H | 1.67087400  | -0.57265400 | 2.88153600 |

15

MeO*i*Pr. Gibbs free energy: -233.503718

|   |             |             |             |
|---|-------------|-------------|-------------|
| O | 0.66265800  | -0.99753400 | -0.46694800 |
| C | 1.65448200  | -0.02837800 | -0.80038400 |
| H | 2.54860000  | -0.56189400 | -1.16233200 |
| C | 0.43253900  | -1.97037200 | -1.46323200 |
| H | -0.24074900 | -2.71506500 | -1.03470600 |
| H | -0.04003200 | -1.54524200 | -2.35781400 |
| H | 1.36941300  | -2.46353300 | -1.75944900 |
| C | 1.99771100  | 0.70160200  | 0.48816000  |
| H | 2.78533200  | 1.43926000  | 0.30955900  |
| H | 1.11630100  | 1.22460900  | 0.87396900  |
| H | 2.34569700  | -0.00250700 | 1.24873300  |
| C | 1.17417900  | 0.93095900  | -1.88701500 |
| H | 0.96425400  | 0.41446400  | -2.82758200 |
| H | 0.26431100  | 1.44537300  | -1.56004000 |
| H | 1.94379400  | 1.68246300  | -2.08774600 |

28

Me<sub>3</sub>Si–OMe*i*Pr<sup>+</sup>. Gibbs free energy: -642.478167

|    |             |             |             |
|----|-------------|-------------|-------------|
| O  | 0.77447500  | -1.05268100 | -0.36736600 |
| C  | 1.79461400  | 0.02897900  | -0.62468600 |
| H  | 2.02283800  | -0.11649600 | -1.68120900 |
| C  | 0.28320500  | -1.65826900 | -1.60087400 |
| H  | -0.45265900 | -2.41247200 | -1.33525300 |
| H  | -0.17021800 | -0.88334400 | -2.21947700 |
| H  | 1.13042400  | -2.12758400 | -2.09824700 |
| C  | 3.03305000  | -0.25387900 | 0.19574500  |
| H  | 3.82780700  | 0.40564800  | -0.16281600 |
| H  | 2.88596000  | -0.05216100 | 1.25700100  |
| H  | 3.35893300  | -1.28736300 | 0.06189600  |
| C  | 1.16513300  | 1.39043200  | -0.42362100 |
| H  | 0.25682900  | 1.50193900  | -1.02018100 |
| H  | 0.93757300  | 1.58999100  | 0.62601800  |
| H  | 1.88163900  | 2.14605300  | -0.75557100 |
| Si | -0.28374000 | -1.24864000 | 1.12658500  |
| C  | 0.67951600  | -0.63865000 | 2.59048800  |
| H  | 0.94439900  | 0.41949900  | 2.54871200  |
| H  | 0.01691900  | -0.77341100 | 3.45425500  |

|   |             |             |             |
|---|-------------|-------------|-------------|
| H | 1.57777200  | -1.23462900 | 2.76896800  |
| C | -1.80895500 | -0.26191400 | 0.74097500  |
| H | -2.54908500 | -0.44232900 | 1.52836100  |
| H | -1.60423500 | 0.81143100  | 0.70929500  |
| H | -2.25787100 | -0.56210700 | -0.21051500 |
| C | -0.55496600 | -3.08619000 | 1.20776500  |
| H | 0.38028000  | -3.63444800 | 1.06204100  |
| H | -0.92453300 | -3.31844800 | 2.21275300  |
| H | -1.29840800 | -3.44939200 | 0.49388000  |

18

MeOtBu. Gibbs free energy: -272.785926

|   |             |             |             |
|---|-------------|-------------|-------------|
| O | 1.18053700  | -1.34873500 | -0.54432700 |
| C | 1.84542600  | -0.07895200 | -0.66962500 |
| C | 0.29183100  | -1.72119900 | -1.57641200 |
| H | -0.06107200 | -2.72484800 | -1.33180300 |
| H | -0.57553400 | -1.05208300 | -1.63579100 |
| H | 0.78130000  | -1.75590500 | -2.55768700 |
| C | 2.61029200  | 0.06427800  | 0.64414000  |
| H | 3.17462300  | 1.00126900  | 0.65893800  |
| H | 1.91576700  | 0.06267600  | 1.48956300  |
| H | 3.31238500  | -0.76581900 | 0.76792200  |
| C | 0.83344800  | 1.06196500  | -0.81840900 |
| H | 0.32277200  | 1.03368300  | -1.78547200 |
| H | 0.08240100  | 1.01306900  | -0.02365600 |
| H | 1.34867600  | 2.02431300  | -0.74625700 |
| C | 2.82224300  | -0.09468700 | -1.85036000 |
| H | 3.39948900  | 0.83480700  | -1.86808700 |
| H | 3.51991600  | -0.93265000 | -1.75677400 |
| H | 2.30388200  | -0.17702900 | -2.81014500 |

31

Me<sub>3</sub>Si-OMe<sup>+</sup>Bu<sup>+</sup>. Gibbs free energy: -681.755246

|    |             |             |             |
|----|-------------|-------------|-------------|
| O  | 0.88580900  | -1.05008000 | -0.39790000 |
| C  | 1.84344000  | 0.12992400  | -0.66410100 |
| C  | 0.31615100  | -1.65959100 | -1.60026600 |
| H  | 0.24189800  | -2.72805800 | -1.42259500 |
| H  | -0.65956600 | -1.21858600 | -1.80354800 |
| H  | 0.99029900  | -1.48403500 | -2.43081400 |
| C  | 2.31960300  | 0.64331100  | 0.68313100  |
| H  | 2.98225100  | 1.48935300  | 0.48792300  |
| H  | 1.50741000  | 1.01791500  | 1.30767100  |
| H  | 2.89317100  | -0.11005000 | 1.22459200  |
| C  | 1.06467000  | 1.19121300  | -1.42414800 |
| H  | 0.70009100  | 0.82931100  | -2.38760700 |
| H  | 0.22081400  | 1.56121700  | -0.83751900 |
| H  | 1.73774300  | 2.02936600  | -1.62132000 |
| Si | -0.10770600 | -1.32774300 | 1.14071700  |
| C  | 1.08249500  | -1.62580000 | 2.53771300  |
| H  | 1.42875000  | -0.71219000 | 3.02319300  |



|   |             |             |             |
|---|-------------|-------------|-------------|
| H | 0.55097600  | -2.22545200 | 3.28514300  |
| H | 1.94843800  | -2.20611900 | 2.20617100  |
| C | -1.22403800 | 0.15188700  | 1.29331600  |
| H | -1.95303400 | -0.06294200 | 2.08287900  |
| H | -0.70521500 | 1.07451100  | 1.56314100  |
| H | -1.78211600 | 0.31891300  | 0.36711100  |
| C | -1.07287600 | -2.87737400 | 0.78250400  |
| H | -0.42937500 | -3.73915500 | 0.58456400  |
| H | -1.63321500 | -3.09362300 | 1.70009200  |
| H | -1.79815000 | -2.77017300 | -0.02723800 |
| C | 3.02461000  | -0.43411800 | -1.44332000 |
| H | 3.80590500  | 0.32929100  | -1.46290000 |
| H | 3.42571100  | -1.32105100 | -0.94764100 |
| H | 2.78917500  | -0.67177000 | -2.48176400 |

16

(MeOCH<sub>2</sub>)<sub>2</sub>. Gibbs free energy: -308.677374

|   |             |             |             |
|---|-------------|-------------|-------------|
| O | 0.74595200  | -1.03375200 | -0.40409800 |
| C | 1.72352000  | -0.07665100 | -0.74711500 |
| H | 2.63942400  | -0.57021200 | -1.10561900 |
| H | 1.35633500  | 0.58316800  | -1.54762200 |
| C | 0.39701100  | -1.86461600 | -1.49107800 |
| H | -0.35673600 | -2.56808900 | -1.13447900 |
| H | -0.02017200 | -1.27812500 | -2.32142500 |
| H | 1.26892500  | -2.42431200 | -1.85716600 |
| C | 2.02933800  | 0.73971500  | 0.49476200  |
| H | 1.11343400  | 1.23327500  | 0.85326600  |
| H | 2.39652200  | 0.07989500  | 1.29526900  |
| O | 3.00690600  | 1.69681600  | 0.15174500  |
| C | 3.35584700  | 2.52767900  | 1.23872500  |
| H | 4.10959400  | 3.23115200  | 0.88212600  |
| H | 2.48393200  | 3.08737500  | 1.60481300  |
| H | 3.77303000  | 1.94118900  | 2.06907200  |

29

Me<sub>3</sub>Si-(MeOCH<sub>2</sub>)<sub>2</sub><sup>+</sup>. Gibbs free energy: -717.650333

|   |            |             |             |
|---|------------|-------------|-------------|
| O | 0.80345200 | -0.94572600 | 0.08032000  |
| C | 1.17054000 | 0.41379300  | -0.30961000 |
| H | 1.40522800 | 0.38621000  | -1.37424000 |
| H | 0.29514200 | 1.04146200  | -0.15559600 |
| C | 1.42007000 | -2.00089500 | -0.71659200 |
| H | 1.28266900 | -2.93926200 | -0.18411000 |
| H | 0.92685300 | -2.02780700 | -1.68761200 |
| H | 2.48251400 | -1.78256000 | -0.80923500 |
| C | 2.35583900 | 0.87925600  | 0.51915800  |
| H | 2.08451800 | 0.92262100  | 1.58476100  |
| H | 3.19901900 | 0.18063200  | 0.41284100  |
| O | 2.68401000 | 2.15149600  | 0.02857400  |
| C | 3.77721400 | 2.74108400  | 0.71050700  |
| H | 3.94725200 | 3.71600600  | 0.25375000  |

|    |             |             |             |
|----|-------------|-------------|-------------|
| H  | 3.55141200  | 2.87278600  | 1.77645300  |
| H  | 4.68171400  | 2.12807200  | 0.60704200  |
| Si | -0.44226500 | -1.38005400 | 1.37418100  |
| C  | -1.14778900 | 0.25713500  | 1.88231400  |
| H  | -1.85877100 | 0.05995600  | 2.69281800  |
| H  | -0.39285800 | 0.94581200  | 2.27171100  |
| H  | -1.70001800 | 0.74198400  | 1.07285500  |
| C  | 0.57770800  | -2.21979200 | 2.67587400  |
| H  | 1.33570500  | -1.54400800 | 3.08188000  |
| H  | -0.08228900 | -2.52236200 | 3.49619300  |
| H  | 1.07193600  | -3.11979200 | 2.29969900  |
| C  | -1.62413600 | -2.48068000 | 0.46233400  |
| H  | -2.45718200 | -2.72406000 | 1.13084800  |
| H  | -2.03298600 | -1.97806400 | -0.41875200 |
| H  | -1.16386900 | -3.42281600 | 0.15268300. |

13

1,2-epoxybutane. Gibbs free energy: -232.286417

|   |             |             |             |
|---|-------------|-------------|-------------|
| C | -2.40485300 | 0.81201800  | -0.10539300 |
| C | -1.01820000 | 0.58089200  | -0.51412200 |
| H | -3.07887400 | 1.36486600  | -0.75551700 |
| H | -2.87679600 | 0.11607100  | 0.58570600  |
| C | -0.21538400 | -0.59722300 | -0.02823000 |
| H | -0.70104200 | 1.00086200  | -1.47002400 |
| C | 1.26312000  | -0.25389200 | 0.15755800  |
| H | -0.64389400 | -0.95523600 | 0.91469900  |
| H | -0.32377600 | -1.40686800 | -0.75997800 |
| H | 1.82632100  | -1.12664900 | 0.49942200  |
| H | 1.70891800  | 0.08768400  | -0.78270200 |
| H | 1.38731000  | 0.54105100  | 0.89941000  |
| O | -1.33870700 | 1.58557000  | 0.45794400  |

26

Me<sub>3</sub>Si-1,2-epoxybutane<sup>+</sup>. Gibbs free energy: -641.265193

|    |             |             |             |
|----|-------------|-------------|-------------|
| C  | -2.13738700 | 0.83714700  | -1.50859300 |
| C  | -1.02839100 | 0.95187700  | -0.56311600 |
| H  | -2.07135600 | 1.32261400  | -2.47615200 |
| H  | -2.84016800 | 0.01687500  | -1.41721700 |
| C  | -0.78596900 | -0.03069400 | 0.53866800  |
| H  | -0.19035900 | 1.57603800  | -0.86529000 |
| C  | -0.23082400 | 0.62727500  | 1.80109400  |
| H  | -1.71323500 | -0.57067700 | 0.75141400  |
| H  | -0.07064400 | -0.76018800 | 0.14138900  |
| H  | -0.02050200 | -0.13108000 | 2.55802600  |
| H  | 0.69920600  | 1.16446300  | 1.59228300  |
| H  | -0.95084900 | 1.33389200  | 2.22332700  |
| O  | -2.26922300 | 1.77367000  | -0.37768600 |
| Si | -2.43959300 | 3.59589600  | -0.45666800 |
| C  | -4.25784300 | 3.77321300  | -0.76311600 |
| H  | -4.50882200 | 4.83740700  | -0.82609600 |

|   |             |            |             |
|---|-------------|------------|-------------|
| H | -4.55340800 | 3.30264600 | -1.70529100 |
| H | -4.83862400 | 3.33270000 | 0.05178100  |
| C | -1.84616400 | 4.07879800 | 1.23095000  |
| H | -0.78627900 | 3.84575300 | 1.36812600  |
| H | -1.97168200 | 5.15929600 | 1.35884900  |
| H | -2.42503700 | 3.57761900 | 2.01186900  |
| C | -1.35316800 | 4.15956000 | -1.85440600 |
| H | -1.45259400 | 5.24834200 | -1.93160000 |
| H | -0.29576600 | 3.94157800 | -1.68014600 |
| H | -1.65338100 | 3.73967600 | -2.81846400 |

16

Anisole. Gibbs free energy: -346.576098

|   |             |             |             |
|---|-------------|-------------|-------------|
| C | -2.53858600 | -1.37058600 | 0.12654600  |
| C | -1.15826700 | -1.48845100 | 0.31471300  |
| C | -0.31201800 | -0.43007600 | 0.01216300  |
| C | -0.83918300 | 0.76860600  | -0.48562700 |
| C | -2.21683200 | 0.89659300  | -0.67959000 |
| C | -3.05477900 | -0.17846800 | -0.36983500 |
| H | -3.19863000 | -2.19781800 | 0.36563600  |
| H | -0.73772800 | -2.41155200 | 0.70177300  |
| H | 0.76060900  | -0.51135800 | 0.15557100  |
| H | -2.64838400 | 1.81217600  | -1.06589800 |
| H | -4.12418600 | -0.06983300 | -0.52263900 |
| O | 0.06662600  | 1.74851700  | -0.74859000 |
| C | -0.40977300 | 2.98809500  | -1.24711500 |
| H | 0.47012600  | 3.61755500  | -1.37377500 |
| H | -0.90849000 | 2.86120300  | -2.21439200 |
| H | -1.09734200 | 3.46252500  | -0.53803700 |

29

Me<sub>3</sub>Si-anisole<sup>+</sup>. Gibbs free energy: -755.543649

|    |             |             |             |
|----|-------------|-------------|-------------|
| C  | -1.06700900 | -2.30381000 | 0.65361300  |
| C  | -0.65474400 | -1.34082300 | 1.57352300  |
| C  | -0.36868900 | -0.04372600 | 1.15073200  |
| C  | -0.50586100 | 0.24005500  | -0.19796300 |
| C  | -0.91822000 | -0.68906900 | -1.13761500 |
| C  | -1.20054200 | -1.98005000 | -0.69634900 |
| H  | -1.28538800 | -3.31143300 | 0.99028800  |
| H  | -0.55226800 | -1.59350600 | 2.62292500  |
| H  | -0.05001300 | 0.71875400  | 1.85291100  |
| H  | -1.01032000 | -0.40964100 | -2.18122900 |
| H  | -1.52251800 | -2.73005000 | -1.41004200 |
| O  | -0.20435000 | 1.55450400  | -0.66209600 |
| C  | -1.28318400 | 2.53052500  | -0.47489400 |
| H  | -0.97960600 | 3.43886800  | -0.98890000 |
| H  | -2.17614100 | 2.10898600  | -0.93181000 |
| H  | -1.41733300 | 2.70169500  | 0.59230300  |
| Si | 1.56508600  | 2.06268500  | -0.92365500 |
| C  | 1.42060500  | 3.37116500  | -2.23002300 |

|   |            |             |             |
|---|------------|-------------|-------------|
| H | 1.06142200 | 4.32470800  | -1.83402800 |
| H | 2.42047200 | 3.54194000  | -2.64433200 |
| H | 0.77103800 | 3.05196400  | -3.05001500 |
| C | 2.34365200 | 0.47964800  | -1.48772300 |
| H | 3.40009600 | 0.68033000  | -1.69831100 |
| H | 2.29552800 | -0.29987800 | -0.72305200 |
| H | 1.87964200 | 0.10819400  | -2.40548400 |
| C | 2.10783600 | 2.68040300  | 0.73872800  |
| H | 3.09318200 | 3.14769300  | 0.63461100  |
| H | 1.42066300 | 3.43835500  | 1.12700000  |
| H | 2.19504400 | 1.87067500  | 1.46813700  |

16

2-pentanone. Gibbs free energy: -271.616831

|   |             |             |             |
|---|-------------|-------------|-------------|
| C | 0.79015000  | 0.88019200  | 0.09040500  |
| O | -0.00091100 | -0.04900400 | 0.11725300  |
| C | 0.32014300  | 2.31475700  | 0.08712500  |
| H | -0.74206000 | 2.37073200  | 0.32790000  |
| H | 0.90076000  | 2.91711700  | 0.79165400  |
| H | 0.48445900  | 2.73878500  | -0.90977000 |
| C | 2.28732300  | 0.66384600  | 0.04565800  |
| C | 2.72849300  | -0.78818600 | -0.09459800 |
| H | 2.68771100  | 1.27812400  | -0.77253200 |
| C | 4.25015200  | -0.92440700 | -0.12554600 |
| H | 2.31840000  | -1.37127000 | 0.73654700  |
| H | 4.70027200  | -0.53380700 | 0.79371000  |
| H | 4.54824000  | -1.97208200 | -0.22662100 |
| H | 4.67909600  | -0.37134800 | -0.96834800 |
| H | 2.70102300  | 1.10674700  | 0.96298200  |
| H | 2.29822300  | -1.21019200 | -1.00943300 |

29

Me<sub>3</sub>Si-2-pentanone<sup>+</sup>. Gibbs free energy: -680.596455

|    |             |             |             |
|----|-------------|-------------|-------------|
| C  | 0.83472900  | 0.90938000  | 0.01234800  |
| O  | 0.06436400  | -0.08229300 | 0.03350700  |
| C  | 0.32437000  | 2.30121500  | -0.05353200 |
| H  | -0.59377600 | 2.42652400  | 0.52161600  |
| H  | 1.08092800  | 3.01132900  | 0.27883000  |
| H  | 0.09965900  | 2.51382200  | -1.10667000 |
| C  | 2.29399400  | 0.65498100  | 0.02230100  |
| C  | 2.72503100  | -0.80461600 | -0.06436300 |
| H  | 2.72075000  | 1.26271800  | -0.78878000 |
| C  | 4.24671600  | -0.93853300 | -0.06051200 |
| H  | 2.29864100  | -1.35747600 | 0.77826300  |
| H  | 4.53844600  | -1.98997300 | -0.12220100 |
| H  | 4.69191000  | -0.41573800 | -0.91314200 |
| H  | 4.67892600  | -0.52161500 | 0.85482900  |
| Si | -1.72970800 | -0.34589200 | 0.04454900  |
| C  | -2.23189800 | 0.11305900  | 1.77310400  |
| H  | -2.10707800 | 1.17984900  | 1.97783100  |

|   |             |             |             |
|---|-------------|-------------|-------------|
| H | -3.29123200 | -0.12989500 | 1.90977200  |
| H | -1.65693400 | -0.45690300 | 2.50848800  |
| C | -2.43780400 | 0.71549300  | -1.30763900 |
| H | -1.87932500 | 0.59763500  | -2.24119000 |
| H | -3.46502600 | 0.38215400  | -1.49314300 |
| H | -2.47634200 | 1.77583700  | -1.04648100 |
| C | -1.78393300 | -2.16160500 | -0.32256400 |
| H | -1.24843100 | -2.73352200 | 0.44049800  |
| H | -2.82407000 | -2.50312800 | -0.33894500 |
| H | -1.33987200 | -2.37609600 | -1.29891300 |
| H | 2.66907500  | 1.13321800  | 0.94037700  |
| H | 2.31295900  | -1.24944800 | -0.97573900 |

15

Cyclohexenone. Gibbs free energy: -308.497558

|   |             |             |             |
|---|-------------|-------------|-------------|
| C | -3.25335900 | -0.81927000 | -1.21595400 |
| C | -1.72839000 | -0.87484800 | -1.11868000 |
| C | -1.13711600 | 0.48053000  | -0.86534400 |
| C | -1.83186700 | 1.50905200  | -0.35261000 |
| C | -3.23864000 | 1.36163400  | 0.06386300  |
| C | -3.84887700 | -0.01921200 | -0.05585400 |
| H | -0.08599300 | 0.62283100  | -1.10692300 |
| H | -1.42035700 | -1.54298100 | -0.30117700 |
| H | -1.29504900 | -1.29701000 | -2.03080200 |
| H | -3.53319100 | -0.34321300 | -2.16320400 |
| H | -3.67247800 | -1.82907300 | -1.22800100 |
| H | -1.37586800 | 2.48212600  | -0.19530100 |
| H | -3.64536400 | -0.53297600 | 0.89480700  |
| H | -4.93323400 | 0.08567600  | -0.14054900 |
| O | -3.86789700 | 2.30677400  | 0.52864700  |

28

Me<sub>3</sub>Si-cyclohexenone<sup>+</sup>. Gibbs free energy: -717.484112

|    |             |             |             |
|----|-------------|-------------|-------------|
| C  | -3.46029700 | -0.79391900 | -1.11006500 |
| C  | -1.97734900 | -1.02952200 | -1.38919600 |
| C  | -1.17941200 | 0.22056900  | -1.26868200 |
| C  | -1.58216500 | 1.31523900  | -0.57790700 |
| C  | -2.80851400 | 1.27109300  | 0.15710100  |
| C  | -3.64919900 | 0.03911500  | 0.15688800  |
| H  | -0.20503800 | 0.24727200  | -1.74952000 |
| H  | -1.55167500 | -1.74979100 | -0.67289100 |
| H  | -1.81779700 | -1.46741300 | -2.37825800 |
| H  | -3.90902700 | -0.26911600 | -1.95991900 |
| H  | -3.98345000 | -1.74562700 | -1.00230300 |
| H  | -0.95928000 | 2.19992300  | -0.53250100 |
| H  | -3.33283900 | -0.53142500 | 1.04386900  |
| H  | -4.69001200 | 0.32461100  | 0.32251400  |
| O  | -3.21445800 | 2.23289100  | 0.88323900  |
| Si | -2.58331000 | 3.85405300  | 1.30933500  |
| C  | -2.48611200 | 4.80084800  | -0.28979400 |

|   |             |            |             |
|---|-------------|------------|-------------|
| H | -2.27192200 | 5.85100800 | -0.06295600 |
| H | -1.70105900 | 4.43865800 | -0.95874100 |
| H | -3.44255800 | 4.76221500 | -0.81972300 |
| C | -0.95444100 | 3.55933200 | 2.15978000  |
| H | -1.05837100 | 2.81117100 | 2.95142700  |
| H | -0.16611300 | 3.23689100 | 1.47456600  |
| H | -0.62850900 | 4.49610100 | 2.62484600  |
| C | -3.92066900 | 4.44990700 | 2.44828700  |
| H | -3.67723300 | 5.45421600 | 2.81023400  |
| H | -4.88390200 | 4.49866900 | 1.93224300  |
| H | -4.02009000 | 3.79040300 | 3.31539400  |

17

Cyclohexeneoxide. Gibbs free energy: -309.662423

|   |             |             |             |
|---|-------------|-------------|-------------|
| C | -3.23922700 | -0.37642200 | -0.98305100 |
| C | -1.70478900 | -0.36152500 | -0.97550200 |
| C | -1.12076500 | 1.03015200  | -0.82647800 |
| C | -1.95854400 | 2.17583500  | -0.44112100 |
| C | -3.43800600 | 2.00631500  | -0.19447700 |
| C | -3.82326800 | 0.55039500  | 0.08468300  |
| H | -1.32521300 | -0.97454600 | -0.14889100 |
| H | -1.32044500 | -0.80725800 | -1.89853500 |
| H | -3.59999900 | -0.04927700 | -1.96728800 |
| H | -3.59635400 | -1.40118900 | -0.83967200 |
| H | -1.64112900 | 3.17240400  | -0.74805600 |
| H | -3.74241900 | 2.65850900  | 0.63215900  |
| H | -3.96258500 | 2.36289500  | -1.09039700 |
| H | -3.45469600 | 0.25290200  | 1.07350700  |
| H | -4.91403000 | 0.46201200  | 0.10901300  |
| H | -0.20771900 | 1.23115600  | -1.38528400 |
| O | -1.08004700 | 1.56361900  | 0.50934500  |

30

Me<sub>3</sub>Si-cyclohexeneoxide<sup>+</sup>. Gibbs free energy: -718.646463

|   |             |             |             |
|---|-------------|-------------|-------------|
| C | -3.36269400 | 0.03531300  | -1.36875800 |
| C | -2.01058800 | -0.48965100 | -0.86641700 |
| C | -1.10393200 | 0.60357400  | -0.36264600 |
| C | -1.59432800 | 1.96976800  | -0.13431500 |
| C | -3.02522400 | 2.33351000  | -0.39458500 |
| C | -3.94358500 | 1.10847700  | -0.44586900 |
| H | -2.14456000 | -1.21020200 | -0.05252700 |
| H | -1.48111700 | -1.01684200 | -1.66450300 |
| H | -3.23400300 | 0.46054500  | -2.37130100 |
| H | -4.05722900 | -0.80285300 | -1.46507700 |
| H | -0.86345300 | 2.77338200  | -0.12320200 |
| H | -3.34999200 | 3.05786700  | 0.35782300  |
| H | -3.03133700 | 2.85198300  | -1.36108500 |
| H | -4.08351100 | 0.70318700  | 0.56249900  |
| H | -4.92761400 | 1.42123600  | -0.80394700 |
| H | -0.03348400 | 0.47084900  | -0.48768800 |

|    |             |             |            |
|----|-------------|-------------|------------|
| O  | -1.42788200 | 1.05196900  | 1.02906300 |
| Si | -0.30860200 | 1.22146800  | 2.45187700 |
| C  | 1.25201300  | 1.99140900  | 1.79928500 |
| H  | 1.08857800  | 3.00241800  | 1.41556100 |
| H  | 1.96650500  | 2.06715800  | 2.62665800 |
| H  | 1.72247900  | 1.38486000  | 1.01988200 |
| C  | -1.31640700 | 2.31813400  | 3.55485800 |
| H  | -0.78578700 | 2.48321200  | 4.49826000 |
| H  | -1.48822200 | 3.29292800  | 3.08854800 |
| H  | -2.28284900 | 1.85977400  | 3.78225100 |
| C  | -0.13645700 | -0.54704600 | 2.98143400 |
| H  | -1.11277300 | -0.98814900 | 3.20071300 |
| H  | 0.35559600  | -1.14535500 | 2.20876900 |
| H  | 0.47381600  | -0.60022600 | 3.88909300 |

34

AsPh<sub>3</sub>. Gibbs free energy: -2928.357134

|    |             |             |             |
|----|-------------|-------------|-------------|
| As | 0.14972600  | -0.06685900 | -1.18563600 |
| C  | 0.95355900  | 1.45011800  | -0.27266100 |
| C  | 1.60475500  | 1.36746800  | 0.95930700  |
| C  | 0.87938100  | 2.68818100  | -0.91864600 |
| C  | 2.15899600  | 2.50497200  | 1.54529500  |
| H  | 1.68044500  | 0.41214200  | 1.47015000  |
| C  | 1.42790000  | 3.82826500  | -0.33516200 |
| H  | 0.38881200  | 2.76835500  | -1.88572000 |
| C  | 2.06785200  | 3.73783600  | 0.90090600  |
| H  | 2.65925700  | 2.42745900  | 2.50572700  |
| H  | 1.35918700  | 4.78415800  | -0.84513200 |
| H  | 2.50009400  | 4.62365000  | 1.35574100  |
| C  | 0.89467400  | -1.52934900 | -0.14341200 |
| C  | 2.09205600  | -2.08178800 | -0.60854300 |
| C  | 0.30656500  | -2.05911300 | 1.00670900  |
| C  | 2.70242100  | -3.13290900 | 0.07215600  |
| H  | 2.55560400  | -1.69003500 | -1.51068800 |
| C  | 0.91231100  | -3.11333700 | 1.68990500  |
| H  | -0.62748100 | -1.64748900 | 1.37812600  |
| C  | 2.11270800  | -3.64967000 | 1.22551800  |
| H  | 3.63247700  | -3.55167700 | -0.29961800 |
| H  | 0.44716500  | -3.51470100 | 2.58511400  |
| H  | 2.58279100  | -4.47234500 | 1.75537000  |
| C  | -1.64942500 | 0.00144800  | -0.45259100 |
| C  | -2.62260100 | -0.77134800 | -1.09409700 |
| C  | -2.01965600 | 0.78138700  | 0.64420100  |
| C  | -3.93844400 | -0.78122700 | -0.63644200 |
| H  | -2.35438100 | -1.37320500 | -1.95924200 |
| C  | -3.33651100 | 0.77840000  | 1.10309600  |
| H  | -1.27903200 | 1.39459600  | 1.14914700  |
| C  | -4.29722800 | -0.00566900 | 0.46598500  |
| H  | -4.68280200 | -1.38854700 | -1.14216600 |

|   |             |             |            |
|---|-------------|-------------|------------|
| H | -3.61127900 | 1.38739300  | 1.95900500 |
| H | -5.32262000 | -0.00736600 | 0.82251200 |

47

Me<sub>3</sub>Si-AsPh<sub>3</sub><sup>+</sup>. Gibbs free energy: -3337.348791

|    |             |             |             |
|----|-------------|-------------|-------------|
| As | 0.14654600  | -0.06186600 | -1.03360700 |
| C  | 1.01156200  | 1.47239900  | -0.29626200 |
| C  | 1.81571300  | 1.36400100  | 0.83779100  |
| C  | 0.82554500  | 2.71260000  | -0.91106100 |
| C  | 2.42939800  | 2.50049800  | 1.35969400  |
| H  | 1.96602800  | 0.40182500  | 1.31719900  |
| C  | 1.43570300  | 3.84663100  | -0.38569800 |
| H  | 0.19963800  | 2.80738100  | -1.79322500 |
| C  | 2.23952000  | 3.73863000  | 0.74894900  |
| H  | 3.05339100  | 2.41789400  | 2.24311100  |
| H  | 1.28681800  | 4.80963700  | -0.86186100 |
| H  | 2.71871300  | 4.62206700  | 1.15764400  |
| C  | 0.90087900  | -1.59380200 | -0.18007100 |
| C  | 2.10507900  | -2.11389400 | -0.65847000 |
| C  | 0.26427500  | -2.18402100 | 0.91175800  |
| C  | 2.67544800  | -3.22326700 | -0.04288700 |
| H  | 2.60881200  | -1.66166000 | -1.50701100 |
| C  | 0.83730300  | -3.29463300 | 1.52687700  |
| H  | -0.67308800 | -1.78376600 | 1.28550400  |
| C  | 2.03943400  | -3.81345300 | 1.04880400  |
| H  | 3.60969700  | -3.62769100 | -0.41703800 |
| H  | 0.34489700  | -3.75338700 | 2.37756900  |
| H  | 2.48132600  | -4.68174600 | 1.52625200  |
| C  | -1.68657300 | 0.02129400  | -0.50276200 |
| C  | -2.58908400 | -0.88764400 | -1.06015900 |
| C  | -2.12331200 | 0.96661000  | 0.42434100  |
| C  | -3.92786300 | -0.85480200 | -0.68482600 |
| H  | -2.25793300 | -1.63074600 | -1.77943200 |
| C  | -3.46604600 | 1.00058300  | 0.79484400  |
| H  | -1.42581100 | 1.67504700  | 0.85986000  |
| C  | -4.36576200 | 0.09196700  | 0.24132900  |
| H  | -4.62708700 | -1.56398300 | -1.11449700 |
| H  | -3.80657600 | 1.73542500  | 1.51634400  |
| H  | -5.41128700 | 0.12199200  | 0.52977400  |
| Si | 0.37033400  | -0.14861600 | -3.43131600 |
| C  | 0.08774800  | -1.94324800 | -3.86299200 |
| H  | 0.32190400  | -2.09190500 | -4.92265200 |
| H  | 0.72579800  | -2.60951500 | -3.27555200 |
| H  | -0.95478700 | -2.23392700 | -3.70685900 |
| C  | -0.96903900 | 0.99488200  | -4.05133100 |
| H  | -0.74678200 | 2.04304800  | -3.83388600 |
| H  | -1.04771300 | 0.88681200  | -5.13844400 |
| H  | -1.94124600 | 0.74756100  | -3.61490900 |
| C  | 2.10543200  | 0.45671600  | -3.76286900 |



|   |            |             |             |
|---|------------|-------------|-------------|
| H | 2.23351500 | 0.58324700  | -4.84324500 |
| H | 2.29235200 | 1.42202600  | -3.28361100 |
| H | 2.86064400 | -0.25400100 | -3.41672400 |

17

Cyclohexanone. Gibbs free energy: -309.706092

|   |             |             |             |
|---|-------------|-------------|-------------|
| C | -0.39931100 | -0.26426700 | -0.98912300 |
| C | 0.30095300  | 0.10249700  | 0.32086800  |
| C | -0.12121300 | 1.49483000  | 0.79442000  |
| C | -1.64730300 | 1.59596300  | 0.96256900  |
| C | -2.38479800 | 1.12824300  | -0.27281900 |
| C | -1.92973800 | -0.19466300 | -0.84831900 |
| H | 0.36168700  | 1.74301400  | 1.74432700  |
| H | 0.04893800  | -0.63889700 | 1.09092300  |
| H | 1.38679000  | 0.06673200  | 0.18612600  |
| H | -0.07827200 | 0.42751200  | -1.77807500 |
| H | -0.11442900 | -1.26986500 | -1.31301000 |
| H | -1.95982500 | 0.93802000  | 1.78567600  |
| H | -2.25867200 | -0.97462100 | -0.14729700 |
| H | -2.43696800 | -0.36303000 | -1.80125400 |
| O | -3.30014100 | 1.77027100  | -0.76488100 |
| H | -1.96624200 | 2.61245600  | 1.20489800  |
| H | 0.21081600  | 2.24280600  | 0.06351400  |

30

Me<sub>3</sub>Si-cyclohexanone\*. Gibbs free energy: -718.687165

|    |             |             |             |
|----|-------------|-------------|-------------|
| C  | -0.73981600 | -0.41447200 | -0.98689700 |
| C  | 0.36832900  | 0.06113200  | -0.04889300 |
| C  | 0.14506900  | 1.51324800  | 0.36853100  |
| C  | -1.23254300 | 1.70609400  | 1.04023300  |
| C  | -2.32136600 | 1.11108300  | 0.22236400  |
| C  | -2.13249200 | -0.24841800 | -0.34302600 |
| H  | 0.91025800  | 1.84343000  | 1.07429400  |
| H  | 0.40105800  | -0.57959000 | 0.84121800  |
| H  | 1.33742300  | -0.03198000 | -0.54675900 |
| H  | -0.70868800 | 0.15476400  | -1.92242100 |
| H  | -0.60959000 | -1.46747000 | -1.24604000 |
| H  | -1.24738600 | 1.15384200  | 1.99113000  |
| H  | -2.20924000 | -0.93462100 | 0.51355600  |
| H  | -2.94772700 | -0.47511300 | -1.03120500 |
| O  | -3.41146600 | 1.69335600  | -0.00666000 |
| Si | -4.14173500 | 3.28819600  | 0.46594700  |
| C  | -3.04826100 | 4.58170900  | -0.30085900 |
| H  | -3.55562300 | 5.54962900  | -0.22264200 |
| H  | -2.07810000 | 4.67628100  | 0.19341500  |
| H  | -2.88464300 | 4.37535200  | -1.36260400 |
| C  | -4.19854600 | 3.27010700  | 2.32371500  |
| H  | -4.65711400 | 2.34765700  | 2.69191400  |
| H  | -3.21263500 | 3.38173800  | 2.78209100  |
| H  | -4.81917400 | 4.10834100  | 2.65900800  |

|   |             |            |             |
|---|-------------|------------|-------------|
| C | -5.79959300 | 3.13098900 | -0.34701200 |
| H | -6.38123100 | 4.04155200 | -0.16962100 |
| H | -5.69458000 | 2.99901600 | -1.42770900 |
| H | -6.35926100 | 2.28348400 | 0.05862100  |
| H | -1.42735800 | 2.75439000 | 1.26519800  |
| H | 0.20666600  | 2.16940500 | -0.50673300 |

20

Dabco. Gibbs free energy: -345.104723

|   |             |             |             |
|---|-------------|-------------|-------------|
| C | 1.19516200  | 0.77570100  | -0.69421800 |
| C | 1.19516200  | -0.78253400 | -0.68644400 |
| H | 1.18729900  | 1.16876800  | -1.71608400 |
| H | 2.08154200  | 1.17640100  | -0.19184400 |
| H | 1.19989300  | -1.18592300 | -1.70428500 |
| H | 2.07553100  | -1.17795500 | -0.16948000 |
| C | -1.19516200 | 0.78253400  | -0.68644400 |
| H | -2.07553100 | 1.17795500  | -0.16948000 |
| H | -1.19989300 | 1.18592300  | -1.70428500 |
| C | -1.19516200 | -0.77570100 | -0.69421800 |
| H | -2.08154200 | -1.17640100 | -0.19184400 |
| H | -1.18729900 | -1.16876800 | -1.71608400 |
| C | -0.00668100 | -0.77886800 | 1.38074900  |
| H | -0.89679200 | -1.16961600 | 1.88439900  |
| H | 0.87064500  | -1.18486900 | 1.89469700  |
| C | 0.00668100  | 0.77886800  | 1.38074900  |
| H | -0.87064500 | 1.18486900  | 1.89469700  |
| H | 0.89679200  | 1.16961600  | 1.88439900  |
| N | -0.00369700 | -1.28398900 | 0.00029700  |
| N | 0.00369700  | 1.28398900  | 0.00029700  |

33

Me<sub>3</sub>Si-Dabco<sup>+</sup>. Gibbs free energy: -754.108643

|   |             |             |             |
|---|-------------|-------------|-------------|
| C | -2.19326500 | 1.05646600  | 0.88067300  |
| C | -0.65954700 | 0.93436300  | 1.05841400  |
| H | -2.45641500 | 2.02286600  | 0.44444100  |
| H | -2.68443500 | 0.98152200  | 1.85315400  |
| H | -0.15788000 | 1.89790700  | 0.95351400  |
| H | -0.39563100 | 0.50816800  | 2.02720500  |
| C | -2.19195000 | 0.23431900  | -1.35505800 |
| H | -2.45541100 | -0.62548200 | -1.97529600 |
| H | -2.68229000 | 1.11462700  | -1.77620100 |
| C | -0.65859800 | 0.44906700  | -1.33633900 |
| H | -0.15588700 | -0.12307400 | -2.11794700 |
| H | -0.39581700 | 1.50163200  | -1.44993200 |
| C | -0.65891400 | -1.38252500 | 0.28144000  |
| H | -0.39336100 | -2.00770100 | -0.57196600 |
| H | -0.15798100 | -1.77241800 | 1.16903100  |
| C | -2.19267500 | -1.29106500 | 0.47441900  |
| H | -2.68226700 | -2.09561100 | -0.07841400 |
| H | -2.45736400 | -1.39853300 | 1.52880400  |

|    |             |             |             |
|----|-------------|-------------|-------------|
| N  | -0.12397800 | 0.00023700  | 0.00151200  |
| N  | -2.69171900 | -0.00020600 | -0.00011500 |
| Si | 1.79003100  | -0.00004400 | -0.00019200 |
| C  | 2.28961600  | 1.61705800  | -0.77763800 |
| H  | 3.37354500  | 1.72067000  | -0.65751800 |
| H  | 2.07027300  | 1.64680200  | -1.84819300 |
| H  | 1.82558000  | 2.48275200  | -0.29665000 |
| C  | 2.28758000  | -1.48155700 | -1.01317300 |
| H  | 3.37169700  | -1.43154600 | -1.16213400 |
| H  | 2.06534800  | -2.42344600 | -0.50447500 |
| H  | 1.82330000  | -1.49569000 | -2.00332800 |
| C  | 2.29509400  | -0.13626800 | 1.78708500  |
| H  | 3.37947700  | -0.28963500 | 1.81251100  |
| H  | 2.07624800  | 0.77474100  | 2.35047900  |
| H  | 1.83466200  | -0.98730400 | 2.29688200  |

19

Cis-2,5-Me<sub>2</sub>-THF. Gibbs free energy: -310.882615

|   |             |             |             |
|---|-------------|-------------|-------------|
| C | -1.18580600 | 0.17061900  | 0.48035800  |
| O | 0.07321300  | 0.86414700  | 0.51167500  |
| C | 1.15586800  | -0.05843800 | 0.35424600  |
| C | 0.55256800  | -1.21073100 | -0.44250400 |
| C | -0.85163800 | -1.30015700 | 0.15753700  |
| H | -1.64519100 | 0.25662500  | 1.47315000  |
| H | 1.45790000  | -0.42495900 | 1.34912900  |
| H | 0.50966900  | -0.94219000 | -1.50480700 |
| H | 1.12482200  | -2.13634600 | -0.34304100 |
| H | -1.58400300 | -1.74410400 | -0.52173300 |
| H | -0.83400600 | -1.89909300 | 1.07342700  |
| C | -2.08629600 | 0.83270900  | -0.55110900 |
| H | -3.08374900 | 0.38234600  | -0.52758500 |
| H | -2.18603500 | 1.90259400  | -0.34655700 |
| H | -1.66991300 | 0.70837500  | -1.55660700 |
| C | 2.32532800  | 0.65045800  | -0.29840700 |
| H | 2.66091900  | 1.49325800  | 0.31261100  |
| H | 3.16403200  | -0.04268900 | -0.41589400 |
| H | 2.03971400  | 1.02624000  | -1.28621900 |

32

Me<sub>3</sub>Si-Cis-2,5-Me<sub>2</sub>-THF<sup>+</sup>. Gibbs free energy: -719.867308

|   |            |             |             |
|---|------------|-------------|-------------|
| C | 1.14484100 | 1.24371800  | -0.21885900 |
| O | 0.27974400 | 0.02259500  | -0.11942200 |
| C | 1.08238800 | -1.24008700 | -0.27663000 |
| C | 2.51280300 | -0.72627800 | -0.30138800 |
| C | 2.40243600 | 0.68708000  | -0.86743400 |
| H | 0.60961200 | 1.92571600  | -0.87742500 |
| H | 0.78576100 | -1.63563000 | -1.25067600 |
| H | 2.92743200 | -0.71571500 | 0.71095700  |
| H | 3.13735500 | -1.37588300 | -0.91644300 |
| H | 3.27036600 | 1.30390700  | -0.62871700 |

|    |             |             |             |
|----|-------------|-------------|-------------|
| H  | 2.28265400  | 0.65958400  | -1.95338000 |
| C  | 1.32194400  | 1.83306900  | 1.16340000  |
| H  | 1.90678000  | 2.75260800  | 1.07771300  |
| H  | 0.35998300  | 2.08871700  | 1.61402900  |
| H  | 1.84872200  | 1.14437100  | 1.82843800  |
| C  | 0.77354500  | -2.20591900 | 0.84343700  |
| H  | -0.23872600 | -2.61034000 | 0.78812600  |
| H  | 1.46723800  | -3.04691200 | 0.75756300  |
| H  | 0.92462500  | -1.73233600 | 1.81683500  |
| Si | -1.53619100 | 0.06494500  | -0.09480000 |
| C  | -2.04077300 | -1.26089100 | -1.29493200 |
| H  | -1.80022900 | -2.27115100 | -0.95434500 |
| H  | -3.12803800 | -1.20495600 | -1.41840100 |
| H  | -1.58598300 | -1.09883200 | -2.27667800 |
| C  | -1.97458300 | 1.77292400  | -0.68080200 |
| H  | -3.06860800 | 1.83897000  | -0.68649900 |
| H  | -1.60516000 | 2.56012500  | -0.01781700 |
| H  | -1.62736900 | 1.96460400  | -1.69988600 |
| C  | -2.02009900 | -0.23373900 | 1.67419400  |
| H  | -1.50397600 | 0.45906000  | 2.34538800  |
| H  | -3.09696000 | -0.05996100 | 1.77711400  |
| H  | -1.81177200 | -1.25519700 | 2.00075900  |

19

trans-2,5-Me<sub>2</sub>-THF. Gibbs free energy: -310.882825

|   |             |             |             |
|---|-------------|-------------|-------------|
| C | 1.10702300  | -0.12504700 | -0.41885300 |
| O | 0.00003000  | -0.93960300 | 0.00006300  |
| C | -1.10701000 | -0.12510600 | 0.41885700  |
| C | -0.76246000 | 1.29309700  | -0.04027400 |
| C | 0.76242600  | 1.29313400  | 0.04030100  |
| H | 1.14737500  | -0.15339000 | -1.51817800 |
| H | -1.14745000 | -0.15345200 | 1.51818300  |
| H | -1.09300600 | 1.44280600  | -1.07522700 |
| H | -1.23560500 | 2.05478300  | 0.58417200  |
| H | 1.23548900  | 2.05483200  | -0.58419600 |
| H | 1.09301000  | 1.44286900  | 1.07523300  |
| C | 2.39941100  | -0.68659400 | 0.14342800  |
| H | 2.55778700  | -1.71473900 | -0.19428100 |
| H | 3.24874200  | -0.08208300 | -0.19133000 |
| H | 2.37405900  | -0.67767500 | 1.23802900  |
| C | -2.39940700 | -0.68660500 | -0.14349600 |
| H | -2.55788400 | -1.71474000 | 0.19418400  |
| H | -3.24868700 | -0.08200500 | 0.19122400  |
| H | -2.37397400 | -0.67766000 | -1.23809400 |

32

Me<sub>3</sub>Si-trans-2,5-Me<sub>2</sub>-THF<sup>+</sup>. Gibbs free energy: -719.86168

|   |            |             |             |
|---|------------|-------------|-------------|
| C | 1.20323600 | 1.08620700  | 0.46422000  |
| O | 0.32718100 | 0.01238100  | -0.10495700 |
| C | 1.18734400 | -1.19436100 | -0.34957600 |

|    |             |             |             |
|----|-------------|-------------|-------------|
| C  | 2.58795200  | -0.60070000 | -0.56311800 |
| C  | 2.43714200  | 0.91530000  | -0.39740000 |
| H  | 1.38746600  | 0.78562300  | 1.49991800  |
| H  | 0.77797300  | -1.63376000 | -1.25758800 |
| H  | 3.27095900  | -1.00474500 | 0.18781700  |
| H  | 2.97684600  | -0.86305500 | -1.54738200 |
| H  | 3.30696900  | 1.37083300  | 0.07867700  |
| H  | 2.27283800  | 1.40638100  | -1.36080800 |
| C  | 0.55862300  | 2.44752800  | 0.40895500  |
| H  | -0.32124300 | 2.52512400  | 1.05004800  |
| H  | 1.29669000  | 3.16117900  | 0.78502600  |
| H  | 0.30357600  | 2.73028800  | -0.61434500 |
| C  | 1.10487600  | -2.14313600 | 0.82786300  |
| H  | 0.09882500  | -2.53463800 | 0.98704600  |
| H  | 1.76494600  | -2.99088700 | 0.62446300  |
| H  | 1.44972600  | -1.65999600 | 1.74607300  |
| Si | -1.49621500 | -0.07791100 | -0.07309300 |
| C  | -1.92496100 | -0.10141800 | 1.73410400  |
| H  | -1.61242700 | 0.81538700  | 2.24217500  |
| H  | -3.01131000 | -0.18922500 | 1.84245500  |
| H  | -1.46406000 | -0.95386400 | 2.24118500  |
| C  | -1.88831500 | -1.64544900 | -0.99500200 |
| H  | -2.98144600 | -1.72269400 | -1.02391600 |
| H  | -1.53953200 | -1.59775200 | -2.03094400 |
| H  | -1.50904300 | -2.55777300 | -0.53102900 |
| C  | -2.13922800 | 1.38551100  | -1.02286400 |
| H  | -1.58301500 | 1.53133900  | -1.95333000 |
| H  | -3.17801400 | 1.15972800  | -1.29040900 |
| H  | -2.13717500 | 2.31733200  | -0.45526800 |

14

Dioxane: Gibbs free energy: -307.495603

|   |             |             |             |
|---|-------------|-------------|-------------|
| C | -4.43416400 | 0.63680000  | -1.26697300 |
| C | -2.50230400 | 1.95243000  | -1.26339400 |
| C | -2.57763400 | 2.05816600  | 0.25110100  |
| C | -4.50949300 | 0.74253600  | 0.24752200  |
| H | -1.46305200 | 1.94874400  | -1.59977800 |
| H | -5.03451900 | 1.43640000  | -1.72689400 |
| H | -4.81190500 | -0.33016800 | -1.60691400 |
| H | -1.97727800 | 1.25856600  | 0.71102100  |
| H | -2.19989200 | 3.02513500  | 0.59104200  |
| H | -3.98808100 | -0.11030900 | 0.70810600  |
| H | -5.54874500 | 0.74622300  | 0.58390600  |
| H | -3.02371600 | 2.80527500  | -1.72397900 |
| O | -3.92430700 | 1.95828300  | 0.69389500  |
| O | -3.08749000 | 0.73668300  | -1.70976800 |

27

Me<sub>3</sub>Si-dioxane<sup>+</sup>. Gibbs free energy: -716.469714

|   |             |            |             |
|---|-------------|------------|-------------|
| C | -4.13972800 | 0.00754800 | -0.93702300 |
|---|-------------|------------|-------------|

|    |             |             |             |
|----|-------------|-------------|-------------|
| C  | -2.29043500 | 1.35774600  | -1.39597400 |
| C  | -2.59602600 | 2.25939800  | -0.21815200 |
| C  | -4.52400000 | 0.85462600  | 0.25777200  |
| H  | -1.20977100 | 1.31317300  | -1.53969000 |
| H  | -4.67118800 | 0.35070000  | -1.83506300 |
| H  | -4.41505400 | -1.02963700 | -0.73924000 |
| H  | -2.11865700 | 1.91937400  | 0.70256700  |
| H  | -2.32866000 | 3.29700000  | -0.41365300 |
| H  | -4.04502700 | 0.51577500  | 1.17817500  |
| H  | -5.60102500 | 0.91344600  | 0.39402900  |
| H  | -2.75479200 | 1.75621200  | -2.30875000 |
| O  | -4.04396000 | 2.22788700  | 0.03746700  |
| Si | -5.08556600 | 3.72409700  | -0.23173300 |
| C  | -4.97180000 | 4.02599300  | -2.05869800 |
| H  | -5.54445500 | 4.92749500  | -2.30317000 |
| H  | -3.94132700 | 4.19261900  | -2.38560800 |
| H  | -5.39406500 | 3.19206300  | -2.62633900 |
| C  | -6.76243500 | 3.21331300  | 0.37115100  |
| H  | -6.74296000 | 2.85548800  | 1.40442200  |
| H  | -7.39849000 | 4.10565200  | 0.34374800  |
| H  | -7.22970600 | 2.45992900  | -0.26871100 |
| C  | -4.24606500 | 4.99720200  | 0.82576400  |
| H  | -4.89235600 | 5.88069200  | 0.87308000  |
| H  | -4.09915900 | 4.63091100  | 1.84566000  |
| H  | -3.28324700 | 5.31779400  | 0.41902500  |
| O  | -2.74058900 | 0.03986000  | -1.14870600 |

14

3-penten-2-one. Gibbs free energy: -270.408009

|   |             |             |             |
|---|-------------|-------------|-------------|
| C | -1.08426100 | 0.14472000  | 0.00050500  |
| O | -1.26483600 | 1.35733200  | 0.00035800  |
| C | -2.24156000 | -0.82228300 | -0.00057500 |
| H | -2.18527000 | -1.46725000 | -0.88416400 |
| H | -2.18071900 | -1.47665400 | 0.87566800  |
| H | -3.19009000 | -0.28494000 | 0.00440800  |
| C | 0.27215300  | -0.45661300 | 0.00100600  |
| C | 1.38107300  | 0.29441200  | -0.00052000 |
| H | 0.33675500  | -1.54294000 | 0.00245700  |
| C | 2.77809900  | -0.23000200 | -0.00018800 |
| H | 1.25882900  | 1.37723000  | -0.00220400 |
| H | 3.31901500  | 0.13640300  | -0.87957900 |
| H | 3.32000700  | 0.14036000  | 0.87692400  |
| H | 2.80713700  | -1.32227100 | 0.00226900  |

27

Me<sub>3</sub>Si-3-penten-2-one\*. Gibbs free energy: -679.391541

|   |             |             |             |
|---|-------------|-------------|-------------|
| C | 0.85941200  | 0.88921800  | 0.00290600  |
| O | 0.07053300  | -0.11060500 | -0.01545100 |
| C | 0.32931800  | 2.27864400  | -0.00489600 |
| H | -0.51728000 | 2.37916400  | 0.67745700  |

|    |             |             |             |
|----|-------------|-------------|-------------|
| H  | 1.10122100  | 3.00064000  | 0.25598500  |
| H  | -0.02814400 | 2.50132700  | -1.01738500 |
| C  | 2.27310500  | 0.65145800  | 0.00302800  |
| C  | 2.78195300  | -0.60242700 | -0.00881000 |
| H  | 2.92275400  | 1.51977700  | 0.01475900  |
| C  | 4.22585800  | -0.92712200 | -0.00828000 |
| H  | 2.08618000  | -1.43962300 | -0.01728800 |
| H  | 4.45756700  | -1.55129500 | 0.86229700  |
| H  | 4.46137300  | -1.53576900 | -0.88879300 |
| H  | 4.85766600  | -0.03798600 | 0.00092800  |
| Si | -1.69836600 | -0.35804200 | 0.00519400  |
| C  | -2.20240000 | -0.00950200 | 1.76142200  |
| H  | -2.07775300 | 1.04273100  | 2.03199700  |
| H  | -3.26151000 | -0.26075700 | 1.88410600  |
| H  | -1.62575700 | -0.62225600 | 2.46024300  |
| C  | -2.44749300 | 0.78006700  | -1.26312700 |
| H  | -1.90585600 | 0.73312900  | -2.21282700 |
| H  | -3.47452500 | 0.44788000  | -1.45167700 |
| H  | -2.49256400 | 1.81987600  | -0.92946400 |
| C  | -1.79176800 | -2.14975600 | -0.46863200 |
| H  | -1.24780900 | -2.77475600 | 0.24548200  |
| H  | -2.83723400 | -2.47493100 | -0.48040300 |
| H  | -1.37337000 | -2.31320200 | -1.46619900 |

17

Methylbutyrate. Gibbs free energy: -346.823658

|   |             |             |             |
|---|-------------|-------------|-------------|
| C | -0.75981700 | 2.15606200  | -0.88017100 |
| O | -0.04110900 | 2.55004600  | -1.77726600 |
| C | -1.04061200 | 0.71247300  | -0.54703400 |
| C | -0.49014100 | -0.27619200 | -1.56997300 |
| H | -0.60934400 | 0.52305100  | 0.44421100  |
| C | -0.77582300 | -1.72236100 | -1.16869400 |
| H | -0.93360400 | -0.06757500 | -2.54957900 |
| H | -0.38672200 | -2.42070500 | -1.91513300 |
| H | -0.30880400 | -1.96280700 | -0.20745900 |
| H | -1.85226200 | -1.90002800 | -1.07087500 |
| C | -1.18214400 | 4.38744500  | -0.24139900 |
| H | -1.49254900 | 4.68322400  | -1.24533300 |
| H | -1.79307100 | 4.88605700  | 0.50857800  |
| H | -0.12761100 | 4.63050000  | -0.09676600 |
| O | -1.39965300 | 2.98442700  | -0.04399200 |
| H | -2.12374700 | 0.59602000  | -0.42909700 |
| H | 0.58860900  | -0.12452500 | -1.67776800 |

30

Me<sub>3</sub>Si-methylbutyrate<sup>+</sup>. Gibbs free energy: -755.800841

|   |             |             |             |
|---|-------------|-------------|-------------|
| C | 0.15345800  | 1.74909000  | -0.67012100 |
| O | 1.19463900  | 1.47676100  | -1.32843700 |
| C | -1.02518400 | 0.84203600  | -0.73052100 |
| C | -0.89441400 | -0.29464300 | -1.74329700 |

|    |             |             |             |
|----|-------------|-------------|-------------|
| H  | -1.17352600 | 0.44718400  | 0.28421400  |
| C  | -2.14326900 | -1.17347500 | -1.74527100 |
| H  | -0.73247400 | 0.12914700  | -2.73895600 |
| H  | -2.04432200 | -1.97361000 | -2.48289100 |
| H  | -2.30412500 | -1.63545800 | -0.76595900 |
| H  | -3.03677700 | -0.59317500 | -1.99729500 |
| C  | -0.96563500 | 3.24874800  | 0.83215300  |
| H  | -1.25619400 | 2.45719400  | 1.52153700  |
| H  | -0.61069400 | 4.11867300  | 1.37641800  |
| H  | -1.78287800 | 3.52081400  | 0.16498900  |
| O  | 0.17604500  | 2.82369300  | 0.04334400  |
| H  | -1.90918400 | 1.45623300  | -0.94134900 |
| H  | -0.01240400 | -0.89532200 | -1.50354800 |
| Si | 2.75320300  | 2.38322700  | -1.45459100 |
| C  | 2.30673000  | 4.02507000  | -2.20274100 |
| H  | 1.68637500  | 4.62396600  | -1.53099600 |
| H  | 3.22714400  | 4.58396700  | -2.40422200 |
| H  | 1.77924000  | 3.89396000  | -3.15212100 |
| C  | 3.69642000  | 1.25820800  | -2.58892300 |
| H  | 3.83050700  | 0.26939800  | -2.14078300 |
| H  | 3.18519500  | 1.14337100  | -3.54903400 |
| H  | 4.68786500  | 1.68211500  | -2.77997900 |
| C  | 3.43250500  | 2.46575400  | 0.27347500  |
| H  | 4.43481300  | 2.90638300  | 0.23733200  |
| H  | 2.81215800  | 3.08727100  | 0.92425300  |
| H  | 3.52007500  | 1.46776100  | 0.71295000  |

15

Et<sub>2</sub>O. Gibbs free energy: -233.504207

|   |             |             |             |
|---|-------------|-------------|-------------|
| C | 0.00000000  | 2.38240700  | 0.40661000  |
| C | 0.00000000  | 1.17994100  | -0.51504100 |
| H | -0.88827400 | 2.38049100  | 1.04530700  |
| H | 0.88827400  | 2.38049100  | 1.04530700  |
| H | 0.00000000  | 3.30553100  | -0.18061700 |
| H | 0.88793800  | 1.19205000  | -1.16655400 |
| H | -0.88793800 | 1.19205000  | -1.16655400 |
| O | 0.00000000  | 0.00000000  | 0.26842400  |
| C | 0.00000000  | -1.17994100 | -0.51504100 |
| C | 0.00000000  | -2.38240700 | 0.40661000  |
| H | 0.88793800  | -1.19205000 | -1.16655400 |
| H | -0.88793800 | -1.19205000 | -1.16655400 |
| H | 0.00000000  | -3.30553100 | -0.18061700 |
| H | 0.88827400  | -2.38049100 | 1.04530700  |
| H | -0.88827400 | -2.38049100 | 1.04530700  |

28

Me<sub>3</sub>Si-OEt<sub>2</sub><sup>+</sup>. Gibbs free energy: -642.48091

|   |             |            |             |
|---|-------------|------------|-------------|
| C | -1.64895900 | 1.93239500 | -0.41326900 |
| C | -1.26777800 | 1.16804200 | 0.83386100  |
| H | -0.77270100 | 2.28163600 | -0.96379200 |



|    |             |             |             |
|----|-------------|-------------|-------------|
| H  | -2.27050100 | 1.33415400  | -1.08133900 |
| H  | -2.22005800 | 2.81298900  | -0.10684800 |
| H  | -2.13894700 | 0.84274800  | 1.40267000  |
| H  | -0.61828200 | 1.74242900  | 1.49341400  |
| O  | -0.52280500 | -0.06840700 | 0.52130900  |
| C  | -1.28127900 | -1.33022500 | 0.62374100  |
| C  | -2.36935500 | -1.43281900 | -0.41819800 |
| H  | -1.66355800 | -1.36330300 | 1.64505100  |
| H  | -0.53541300 | -2.11459900 | 0.50654200  |
| H  | -2.82192900 | -2.42413000 | -0.33203200 |
| H  | -3.15862500 | -0.69403000 | -0.26410200 |
| H  | -1.96402800 | -1.32550700 | -1.42689600 |
| Si | 1.19560300  | -0.06087200 | -0.11329300 |
| C  | 1.00264200  | -0.28809800 | -1.94507500 |
| H  | 0.43191600  | 0.52729300  | -2.39771600 |
| H  | 1.99363400  | -0.31065500 | -2.41109200 |
| H  | 0.50591500  | -1.23533700 | -2.17575300 |
| C  | 1.86773500  | 1.58354100  | 0.42389800  |
| H  | 1.86099700  | 1.68706600  | 1.51267800  |
| H  | 2.91292900  | 1.62320600  | 0.09647300  |
| H  | 1.35437400  | 2.43845000  | -0.02210000 |
| C  | 2.01487900  | -1.48548300 | 0.75340200  |
| H  | 1.80931300  | -1.47543100 | 1.82766700  |
| H  | 1.73488000  | -2.45887400 | 0.34262400  |
| H  | 3.09678000  | -1.37277100 | 0.62001700  |

9

EtOH. Gibbs free energy: -154.956083

|   |             |             |             |
|---|-------------|-------------|-------------|
| C | -2.51905900 | 0.69095900  | -0.00003000 |
| C | -1.00415000 | 0.70972000  | -0.00001000 |
| H | -2.90892300 | 1.71321600  | -0.00001200 |
| H | -2.89940200 | 0.17773000  | -0.88832300 |
| H | -2.89942400 | 0.17769000  | 0.88822900  |
| H | -0.63123900 | 1.23678100  | -0.88814800 |
| H | -0.63126200 | 1.23674200  | 0.88816000  |
| O | -0.53975800 | -0.63931000 | -0.00003500 |
| H | 0.42200200  | -0.63487900 | -0.00002200 |

22

Me<sub>3</sub>Si-ethanol<sup>+</sup>. Gibbs free energy: -563.934993

|    |             |             |             |
|----|-------------|-------------|-------------|
| C  | -2.33831500 | 0.70586600  | 0.35393400  |
| C  | -1.00267500 | 0.64311300  | -0.34103200 |
| H  | -2.76926200 | 1.69562800  | 0.18303900  |
| H  | -3.03327200 | -0.03645600 | -0.04761300 |
| H  | -2.22587600 | 0.55509600  | 1.42936100  |
| H  | -1.06928100 | 0.77220800  | -1.42153500 |
| H  | -0.28936100 | 1.35461900  | 0.07266700  |
| O  | -0.38382500 | -0.68180300 | -0.10324000 |
| H  | -0.93944200 | -1.40136200 | -0.43880300 |
| Si | 1.43372600  | -0.97712200 | -0.00816300 |

|   |            |             |             |
|---|------------|-------------|-------------|
| C | 2.09943200 | -0.22605500 | -1.56732400 |
| H | 1.92969400 | 0.85392800  | -1.60473400 |
| H | 3.18082500 | -0.39429000 | -1.61208100 |
| H | 1.64881900 | -0.68633400 | -2.45130500 |
| C | 1.89283700 | -0.09108100 | 1.55366100  |
| H | 1.32818600 | -0.47708900 | 2.40662400  |
| H | 2.95827800 | -0.25471700 | 1.74833300  |
| H | 1.73440100 | 0.98853900  | 1.47961600  |
| C | 1.48342300 | -2.82776900 | 0.07646500  |
| H | 1.09253400 | -3.28958900 | -0.83476400 |
| H | 2.52620300 | -3.14330500 | 0.18801400  |
| H | 0.92590100 | -3.20487900 | 0.93849000  |

24

Hexylmethylether. Gibbs free energy: -351.339336

|   |             |             |             |
|---|-------------|-------------|-------------|
| C | 2.94307100  | 3.31051800  | 0.00000000  |
| C | 1.50710900  | 2.78755800  | 0.00000000  |
| H | 2.97144000  | 4.40460400  | 0.00000000  |
| H | 3.48671000  | 2.96060700  | 0.88469000  |
| H | 3.48671000  | 2.96060700  | -0.88469000 |
| C | 1.43154200  | 1.26080600  | 0.00000000  |
| H | 0.97550100  | 3.17512300  | 0.87881200  |
| H | 0.97550100  | 3.17512300  | -0.87881200 |
| C | 0.00000000  | 0.72464100  | 0.00000000  |
| H | 1.96354000  | 0.87225500  | -0.87952200 |
| H | 1.96354000  | 0.87225500  | 0.87952200  |
| H | -0.53075100 | 1.11317200  | 0.87994000  |
| H | -0.53075100 | 1.11317200  | -0.87994000 |
| C | -0.06201800 | -0.80290200 | 0.00000000  |
| C | -1.48786100 | -1.32330400 | 0.00000000  |
| H | 0.45852000  | -1.19549200 | 0.88220500  |
| H | 0.45852000  | -1.19549200 | -0.88220500 |
| H | -2.02870500 | -0.95882800 | 0.88867500  |
| H | -2.02870500 | -0.95882800 | -0.88867500 |
| O | -1.46742900 | -2.73857200 | 0.00000000  |
| C | -2.76182800 | -3.29920400 | 0.00000000  |
| H | -2.64725300 | -4.38451200 | 0.00000000  |
| H | -3.32723400 | -2.99692900 | 0.89322700  |
| H | -3.32723400 | -2.99692900 | -0.89322700 |

37

Me<sub>3</sub>Si-hexylmethylether<sup>+</sup>. Gibbs free energy: -760.313752

|   |            |             |             |
|---|------------|-------------|-------------|
| C | 5.81281400 | -0.61423200 | -0.51376100 |
| C | 4.71219300 | -0.00486100 | 0.35322700  |
| H | 6.79304000 | -0.51744700 | -0.03751900 |
| H | 5.62857400 | -1.67976500 | -0.68963000 |
| H | 5.86351900 | -0.11866100 | -1.48947500 |
| C | 3.32673400 | -0.11930600 | -0.28291700 |
| H | 4.70047300 | -0.49952500 | 1.33283700  |
| H | 4.93515900 | 1.05302400  | 0.54201800  |

|    |             |             |             |
|----|-------------|-------------|-------------|
| C  | 2.22191400  | 0.48146200  | 0.58593000  |
| H  | 3.33362200  | 0.38177700  | -1.26027400 |
| H  | 3.10270500  | -1.17718100 | -0.47587600 |
| H  | 2.20572600  | -0.02983900 | 1.55711600  |
| H  | 2.44850100  | 1.53615100  | 0.78779000  |
| C  | 0.84187500  | 0.37592500  | -0.06966600 |
| C  | -0.22307200 | 0.93612700  | 0.85011900  |
| H  | 0.62643600  | -0.67460800 | -0.29514600 |
| H  | 0.84406300  | 0.92065000  | -1.02014100 |
| H  | -0.33651400 | 0.35530900  | 1.76495000  |
| H  | -0.03392000 | 1.97696800  | 1.11797500  |
| O  | -1.55914200 | 0.93749400  | 0.22182000  |
| C  | -1.84247200 | 2.11837100  | -0.58363500 |
| H  | -2.83101200 | 1.99141500  | -1.01879500 |
| H  | -1.83397400 | 2.98000700  | 0.08206400  |
| H  | -1.09014000 | 2.20604400  | -1.36681900 |
| Si | -2.53393900 | -0.59832300 | -0.04411400 |
| C  | -1.85847000 | -1.77519900 | 1.22035500  |
| H  | -2.42064200 | -2.71094900 | 1.12350000  |
| H  | -0.80224900 | -2.01154400 | 1.06825800  |
| H  | -2.00404700 | -1.40655000 | 2.23951300  |
| C  | -4.27587400 | -0.05784700 | 0.29863600  |
| H  | -4.67411500 | 0.61698300  | -0.46348700 |
| H  | -4.91141700 | -0.95043800 | 0.31091000  |
| H  | -4.35352500 | 0.42432900  | 1.27714500  |
| C  | -2.19088500 | -1.05617500 | -1.80997200 |
| H  | -2.49752700 | -0.26663900 | -2.50217500 |
| H  | -1.13115500 | -1.27133300 | -1.97224300 |
| H  | -2.76184700 | -1.95719400 | -2.05934500 |

35

H-PPh<sub>3</sub><sup>+</sup>. Gibbs free energy: -1036.285033

|   |             |             |             |
|---|-------------|-------------|-------------|
| P | -0.03020800 | -0.02892900 | -0.88320200 |
| C | 0.59624600  | 1.57995600  | -0.38508600 |
| C | 1.57460500  | 1.67833100  | 0.60865600  |
| C | 0.05492500  | 2.73097800  | -0.97225800 |
| C | 2.01044400  | 2.93650700  | 1.01607000  |
| H | 1.99598200  | 0.78693200  | 1.06225500  |
| C | 0.49847700  | 3.98125600  | -0.55776500 |
| H | -0.70719100 | 2.65817200  | -1.74245800 |
| C | 1.47394800  | 4.08313000  | 0.43499200  |
| H | 2.76943300  | 3.01737900  | 1.78624300  |
| H | 0.08359100  | 4.87529300  | -1.00987600 |
| H | 1.81754000  | 5.06124200  | 0.75500200  |
| C | 1.06261300  | -1.34239000 | -0.32994500 |
| C | 2.28808200  | -1.53009200 | -0.98174500 |
| C | 0.70824100  | -2.13230900 | 0.76785500  |
| C | 3.15971100  | -2.51223100 | -0.52561000 |
| H | 2.56442500  | -0.91675500 | -1.83429800 |

|   |             |             |             |
|---|-------------|-------------|-------------|
| C | 1.58980000  | -3.11224600 | 1.21610000  |
| H | -0.24397700 | -1.98929800 | 1.26872400  |
| C | 2.81081600  | -3.30025100 | 0.57202400  |
| H | 4.10959800  | -2.66298500 | -1.02643100 |
| H | 1.31967000  | -3.72816000 | 2.06678700  |
| H | 3.49494900  | -4.06504900 | 0.92419900  |
| C | -1.69983600 | -0.27758600 | -0.27126800 |
| C | -2.14630500 | 0.43500400  | 0.84620500  |
| C | -2.52390800 | -1.22283400 | -0.89463700 |
| C | -3.42409000 | 0.19460700  | 1.34271200  |
| H | -1.50898100 | 1.17188000  | 1.32483200  |
| C | -3.79940400 | -1.45245500 | -0.39098800 |
| H | -2.17804400 | -1.77552700 | -1.76297100 |
| C | -4.24674200 | -0.74564100 | 0.72564500  |
| H | -3.77572900 | 0.74365400  | 2.20909100  |
| H | -4.44427200 | -2.17982600 | -0.87159000 |
| H | -5.24288300 | -0.92719300 | 1.11510200  |
| H | -0.07666000 | -0.06756800 | -2.28102400 |

24

Imine. Gibbs free energy: -656.954123

|    |             |             |             |
|----|-------------|-------------|-------------|
| C  | -0.98208800 | 0.78832900  | 0.19999400  |
| O  | -1.64976800 | -0.32016100 | 0.56880000  |
| N  | 0.20496300  | 0.70024100  | -0.25387700 |
| C  | -1.77718600 | 2.05086000  | 0.39570700  |
| H  | -1.32553800 | 2.65975700  | 1.18578600  |
| H  | -1.77547700 | 2.65060300  | -0.51905700 |
| H  | -2.80520600 | 1.81972000  | 0.67275500  |
| C  | 0.88385300  | 1.92938300  | -0.63359800 |
| H  | 0.88187000  | 2.68118900  | 0.16687800  |
| H  | 1.92450400  | 1.70261300  | -0.87517200 |
| H  | 0.42867700  | 2.38845700  | -1.52152900 |
| Si | -1.01658300 | -1.91822000 | 0.47978500  |
| C  | 0.48650900  | -2.09324100 | 1.58117500  |
| H  | 1.36109900  | -1.60564800 | 1.14417700  |
| H  | 0.29814300  | -1.65027400 | 2.56490900  |
| H  | 0.71362500  | -3.15519000 | 1.72854200  |
| C  | -0.67075500 | -2.38133500 | -1.29999700 |
| H  | -0.47392300 | -3.45705200 | -1.37100700 |
| H  | -1.53485000 | -2.15529700 | -1.93376500 |
| H  | 0.19585300  | -1.84156500 | -1.68934600 |
| C  | -2.44247200 | -2.92483800 | 1.15662700  |
| H  | -3.35563000 | -2.75829900 | 0.57600300  |
| H  | -2.20427800 | -3.99335300 | 1.11317000  |
| H  | -2.64761400 | -2.66679000 | 2.20079500  |

14

iPrCOOH. Gibbs free energy: -307.555966

|   |             |             |             |
|---|-------------|-------------|-------------|
| C | -1.42621900 | 1.07666800  | -0.45056000 |
| C | -0.61558500 | -0.22277300 | -0.41303900 |

|   |             |             |             |
|---|-------------|-------------|-------------|
| H | -0.63536700 | -0.68143000 | -1.40505800 |
| H | -0.97173500 | 1.82341100  | -1.10738700 |
| H | -2.42951000 | 0.86298500  | -0.82777600 |
| H | -1.55617100 | 1.51784400  | 0.54542300  |
| C | -1.19867500 | -1.22696900 | 0.59645200  |
| H | -0.64787600 | -2.17078900 | 0.58099300  |
| H | -1.17328200 | -0.82524200 | 1.61459000  |
| H | -2.24186900 | -1.43285100 | 0.34218400  |
| C | 0.86133900  | -0.01931200 | -0.11396200 |
| O | 1.19503300  | 0.90727700  | 0.80365100  |
| H | 0.41898600  | 1.37763300  | 1.13420600  |
| O | 1.74392500  | -0.67193200 | -0.62746600 |

27

Me<sub>3</sub>Si-iPrCOOH<sup>+</sup>. Gibbs free energy: -716.5369

|    |             |             |             |
|----|-------------|-------------|-------------|
| C  | 3.48960100  | -0.67226700 | -0.23586100 |
| C  | 2.33821400  | 0.31203700  | -0.43567900 |
| H  | 2.25282800  | 0.56538400  | -1.49930100 |
| H  | 3.35375000  | -1.59791500 | -0.80340200 |
| H  | 4.40978300  | -0.21085700 | -0.59843900 |
| H  | 3.64795000  | -0.90485500 | 0.82326300  |
| C  | 2.54288700  | 1.62238600  | 0.35048700  |
| H  | 1.73124900  | 2.32874500  | 0.16917400  |
| H  | 2.61453200  | 1.42510200  | 1.42339700  |
| H  | 3.47879200  | 2.07771700  | 0.02176100  |
| C  | 0.99458800  | -0.25922500 | -0.09260500 |
| O  | 0.83764800  | -1.42800100 | 0.44286900  |
| H  | 1.67812000  | -1.88949200 | 0.59375300  |
| O  | -0.03870200 | 0.41752600  | -0.32282200 |
| Si | -1.79040800 | 0.04980800  | -0.01129900 |
| C  | -2.16123600 | -1.44415800 | -1.05096100 |
| H  | -3.23134400 | -1.66636300 | -0.97672300 |
| H  | -1.92805200 | -1.26066500 | -2.10376000 |
| H  | -1.60917600 | -2.32453100 | -0.71181900 |
| C  | -1.91503400 | -0.21427100 | 1.82316600  |
| H  | -1.39214500 | -1.11948600 | 2.14194200  |
| H  | -1.51363000 | 0.64187300  | 2.37299000  |
| H  | -2.97181400 | -0.32193900 | 2.09070300  |
| C  | -2.56322200 | 1.62322500  | -0.61465900 |
| H  | -2.19320000 | 2.48490200  | -0.05169100 |
| H  | -2.35960000 | 1.78243800  | -1.67734900 |
| H  | -3.64868500 | 1.57007400  | -0.48000500 |

26

iPrCOO-SiMe<sub>3</sub>. Gibbs free energy: -716.142184

|   |             |             |             |
|---|-------------|-------------|-------------|
| C | -2.33954000 | -1.14802900 | 0.41153900  |
| C | -1.10950200 | -0.73911100 | -0.40877200 |
| H | -1.27058800 | -1.00795400 | -1.45648300 |
| H | -3.24425800 | -0.64489800 | 0.05748100  |
| H | -2.49555300 | -2.22717100 | 0.32418800  |

|    |             |             |             |
|----|-------------|-------------|-------------|
| H  | -2.19798600 | -0.90556400 | 1.46864700  |
| C  | 0.15929100  | -1.43598700 | 0.09968400  |
| H  | 1.04024100  | -1.14017700 | -0.47796900 |
| H  | 0.33801900  | -1.19683100 | 1.15204600  |
| H  | 0.04196200  | -2.51973800 | 0.00908800  |
| C  | -0.93293800 | 0.76643100  | -0.39912200 |
| O  | -0.74607000 | 1.27210900  | 0.81753400  |
| O  | -0.95699100 | 1.45775700  | -1.40442800 |
| Si | -0.52669900 | 2.96357700  | 1.13768400  |
| C  | -2.06163700 | 3.88293100  | 0.59958200  |
| H  | -2.95277000 | 3.47166700  | 1.08457900  |
| H  | -1.97956500 | 4.93865500  | 0.88067300  |
| H  | -2.19680100 | 3.82397100  | -0.48357500 |
| C  | 1.01785900  | 3.55039300  | 0.26573900  |
| H  | 1.21857900  | 4.59538500  | 0.52662400  |
| H  | 1.88617400  | 2.95424700  | 0.56461300  |
| H  | 0.90430700  | 3.48111900  | -0.81935500 |
| C  | -0.32557200 | 2.98174400  | 2.99439000  |
| H  | 0.54573800  | 2.39455400  | 3.30160900  |
| H  | -0.18536700 | 4.00818100  | 3.35011600  |
| H  | -1.21085400 | 2.56930600  | 3.48869800  |

17

Lutidine. Gibbs free energy: -326.728259

|   |             |             |             |
|---|-------------|-------------|-------------|
| C | 1.15759400  | 0.26677100  | -0.00615100 |
| C | 1.19845700  | -1.12989600 | -0.00850100 |
| C | 0.00000000  | -1.83471800 | 0.00000000  |
| C | -1.19845700 | -1.12989600 | 0.00850100  |
| C | -1.15759400 | 0.26677100  | 0.00615100  |
| N | 0.00000000  | 0.94372900  | 0.00000000  |
| H | 0.00000000  | -2.92043700 | 0.00000000  |
| H | 2.15162500  | -1.64786800 | -0.01529100 |
| H | -2.15162500 | -1.64786800 | 0.01529100  |
| C | -2.41647700 | 1.09177000  | -0.00386600 |
| H | -2.51595000 | 1.61585200  | -0.95990100 |
| H | -3.30419200 | 0.47232100  | 0.14165300  |
| H | -2.38101200 | 1.84914800  | 0.78383800  |
| C | 2.41647700  | 1.09177000  | 0.00386600  |
| H | 2.38101200  | 1.84914700  | -0.78383800 |
| H | 2.51595000  | 1.61585300  | 0.95990100  |
| H | 3.30419200  | 0.47232100  | -0.14165300 |

30

Me<sub>3</sub>Si-lutidine<sup>+</sup>. Gibbs free energy: -735.707285

|   |             |             |             |
|---|-------------|-------------|-------------|
| C | -1.07369100 | -1.18831000 | 0.07287300  |
| C | -2.44661000 | -1.19393700 | -0.12720200 |
| C | -3.13906300 | -0.00252900 | -0.26935600 |
| C | -2.44460100 | 1.18618000  | -0.11930500 |
| C | -1.07137000 | 1.17581200  | 0.07989000  |
| N | -0.37916700 | -0.00678800 | 0.08535700  |

|    |             |             |             |
|----|-------------|-------------|-------------|
| H  | -4.20942500 | -0.00104300 | -0.44160300 |
| H  | -2.96366300 | -2.14524600 | -0.15012700 |
| H  | -2.95890100 | 2.13919800  | -0.13585400 |
| C  | -0.38659100 | 2.48567000  | 0.34479200  |
| H  | -0.06720100 | 2.96677800  | -0.58174500 |
| H  | -1.10079400 | 3.15131900  | 0.83122400  |
| H  | 0.47291600  | 2.38573200  | 1.00659300  |
| C  | -0.38984700 | -2.49859700 | 0.33527300  |
| H  | -0.00136000 | -2.94462500 | -0.58190400 |
| H  | 0.42078900  | -2.40684400 | 1.05870500  |
| H  | -1.12367600 | -3.19023900 | 0.75057900  |
| Si | 1.54128400  | 0.00578500  | -0.04461900 |
| C  | 2.05810300  | 1.46784800  | -1.09329100 |
| H  | 1.37801500  | 1.63383500  | -1.93446900 |
| H  | 2.18213300  | 2.40243300  | -0.54599600 |
| H  | 3.03220900  | 1.20182900  | -1.51696900 |
| C  | 2.14438700  | 0.05049000  | 1.71741300  |
| H  | 1.81479300  | -0.82862900 | 2.27857900  |
| H  | 3.23959200  | 0.05487100  | 1.71103800  |
| H  | 1.80659800  | 0.94249900  | 2.25178200  |
| C  | 2.12940900  | -1.49353400 | -0.99637300 |
| H  | 2.20525600  | -2.41096100 | -0.41325400 |
| H  | 1.52916300  | -1.68238400 | -1.89143000 |
| H  | 3.13900000  | -1.23655900 | -1.33626900 |

15

Methylcrotonate. Gibbs free energy: -345.612744

|   |             |             |             |
|---|-------------|-------------|-------------|
| C | 0.67053400  | 0.70271600  | 0.17827600  |
| O | 0.60402600  | 1.91105500  | 0.32325100  |
| C | -0.47473100 | -0.21835600 | 0.03542300  |
| C | -1.73277800 | 0.23397100  | 0.06543300  |
| H | -0.24826600 | -1.27272400 | -0.09294700 |
| C | -2.95100800 | -0.61843900 | -0.06424300 |
| H | -1.88921600 | 1.30356700  | 0.19822300  |
| H | -3.57939500 | -0.51589800 | 0.82708100  |
| H | -3.55635200 | -0.28660300 | -0.91473100 |
| H | -2.70140700 | -1.67337000 | -0.19994300 |
| C | 3.02491100  | 0.82293800  | 0.26315600  |
| H | 3.03724300  | 1.33547300  | 1.22713100  |
| H | 3.84857900  | 0.11464800  | 0.19883800  |
| H | 3.08797900  | 1.55756700  | -0.54198200 |
| O | 1.83443600  | 0.03782700  | 0.13080900  |

28

Me<sub>3</sub>Si-methylcrotonate<sup>+</sup>. Gibbs free energy: -754.595585

|   |             |             |             |
|---|-------------|-------------|-------------|
| C | 0.79300100  | 0.44485500  | -0.01770600 |
| O | -0.06510000 | -0.49512100 | 0.00621300  |
| C | 2.20431500  | 0.14758900  | -0.03443200 |
| C | 2.63055800  | -1.13071600 | -0.02422700 |
| H | 2.90759000  | 0.97045300  | -0.05395400 |

|    |             |             |             |
|----|-------------|-------------|-------------|
| C  | 4.05543600  | -1.54034200 | -0.03734700 |
| H  | 1.88804800  | -1.92572100 | -0.00431700 |
| H  | 4.26610900  | -2.15070300 | 0.84774200  |
| H  | 4.24207900  | -2.18302000 | -0.90459600 |
| H  | 4.73765800  | -0.68934200 | -0.06161800 |
| C  | 1.16783600  | 2.82303400  | -0.05262100 |
| H  | 1.76510000  | 2.82381900  | -0.96421500 |
| H  | 0.47402800  | 3.65868100  | -0.05322600 |
| H  | 1.79095300  | 2.84655900  | 0.84125300  |
| O  | 0.31777000  | 1.65010500  | -0.02582900 |
| Si | -1.85321700 | -0.40435900 | 0.03354300  |
| C  | -2.29905500 | 0.49497600  | 1.59953000  |
| H  | -2.01923600 | 1.55060600  | 1.55380100  |
| H  | -3.38238800 | 0.43546100  | 1.75013900  |
| H  | -1.81426600 | 0.03698800  | 2.46691400  |
| C  | -2.34834000 | 0.46490400  | -1.53459200 |
| H  | -1.88039700 | -0.00241900 | -2.40629100 |
| H  | -3.43431500 | 0.39202500  | -1.65744300 |
| H  | -2.07800200 | 1.52375700  | -1.51321100 |
| C  | -2.27420600 | -2.21268900 | 0.05730800  |
| H  | -1.85604700 | -2.70199800 | 0.94189800  |
| H  | -3.36175300 | -2.33832000 | 0.08181800  |
| H  | -1.89364700 | -2.71726400 | -0.83561800 |

17

Methyl-(E)-3-(oxiran-2-yl)acrylate. Gibbs free energy: -458.856373

|   |             |             |             |
|---|-------------|-------------|-------------|
| C | 0.64164800  | 0.57840200  | 0.17004600  |
| O | 0.47917100  | 1.73911300  | -0.15769100 |
| C | -0.46294400 | -0.29977500 | 0.63115400  |
| C | -1.71172200 | 0.17542700  | 0.68911600  |
| H | -0.25721000 | -1.32412400 | 0.91966600  |
| C | -2.86630900 | -0.63911400 | 1.11100300  |
| H | -1.91395400 | 1.20691800  | 0.40716100  |
| H | -2.64620200 | -1.61830100 | 1.53222100  |
| C | 2.18215500  | -1.27662800 | 0.46824700  |
| H | 1.64369800  | -1.97883900 | -0.17205600 |
| H | 3.25222000  | -1.38801900 | 0.30409100  |
| H | 1.95669000  | -1.46196500 | 1.52083500  |
| O | 1.88561100  | 0.07847500  | 0.10965000  |
| C | -4.18475800 | -0.43750800 | 0.48605400  |
| H | -4.29794900 | 0.31655000  | -0.28959100 |
| H | -4.87716800 | -1.27475500 | 0.44957800  |
| O | -3.91086500 | 0.07058400  | 1.78646000  |

30

Me<sub>3</sub>Si-Methyl-(E)-3-(oxiran-2-yl)acrylate<sup>+</sup>. Gibbs free E: -867.834248

|   |             |             |             |
|---|-------------|-------------|-------------|
| C | 1.11573100  | 0.09540700  | 0.33040900  |
| O | 1.62639600  | 1.10432300  | -0.24926900 |
| C | -0.28252600 | -0.22072500 | 0.14150700  |
| C | -1.04764500 | 0.55413300  | -0.64857400 |



|    |             |             |             |
|----|-------------|-------------|-------------|
| H  | -0.69321300 | -1.08488600 | 0.64789900  |
| C  | -2.46644700 | 0.28431100  | -0.90999800 |
| H  | -0.62087400 | 1.42568200  | -1.14021300 |
| H  | -2.96067900 | -0.44914400 | -0.27744800 |
| C  | 1.46334800  | -1.78228000 | 1.79600000  |
| H  | 1.09903900  | -2.52703500 | 1.08919000  |
| H  | 2.35479000  | -2.14321100 | 2.30044300  |
| H  | 0.70112600  | -1.50221800 | 2.52229200  |
| O  | 1.90718900  | -0.60343000 | 1.07784800  |
| C  | -2.99579400 | 0.50585500  | -2.27326700 |
| H  | -2.32954100 | 0.85850700  | -3.05679700 |
| H  | -3.84524100 | -0.09428700 | -2.58810700 |
| O  | -3.25122200 | 1.43244000  | -1.23196300 |
| Si | 3.30363200  | 1.73980700  | -0.18259600 |
| C  | 3.15965000  | 3.16847100  | -1.35944000 |
| H  | 4.12456500  | 3.68040500  | -1.43633700 |
| H  | 2.87738900  | 2.82665700  | -2.35966700 |
| H  | 2.41693200  | 3.89310700  | -1.01334000 |
| C  | 4.40390600  | 0.36948000  | -0.79159400 |
| H  | 4.04844400  | -0.02577700 | -1.74792200 |
| H  | 5.41305800  | 0.76665000  | -0.94570700 |
| H  | 4.46600700  | -0.44996200 | -0.07121300 |
| C  | 3.57968300  | 2.23345000  | 1.58874800  |
| H  | 4.55643100  | 2.72111800  | 1.67783500  |
| H  | 2.81737000  | 2.94383600  | 1.92186800  |
| H  | 3.57170800  | 1.36711100  | 2.25552800  |

18

MeOSiMe<sub>3</sub>. Gibbs free energy: -524.251478

|    |             |             |             |
|----|-------------|-------------|-------------|
| O  | 0.54167800  | -0.83575200 | -0.71575500 |
| C  | 1.87647300  | -0.57774100 | -0.32141700 |
| H  | 2.53944300  | -1.20284400 | -0.92478800 |
| H  | 2.04078500  | -0.81916400 | 0.73675600  |
| Si | -0.76303500 | -0.09428400 | 0.04902300  |
| C  | -2.26762100 | -0.66150000 | -0.90590400 |
| H  | -2.37529600 | -1.74998800 | -0.85775100 |
| H  | -3.17591500 | -0.21289500 | -0.48918400 |
| H  | -2.19644800 | -0.37002200 | -1.95876200 |
| C  | -0.84400200 | -0.64917600 | 1.84145500  |
| H  | 0.05827400  | -0.36267200 | 2.39259900  |
| H  | -1.70074700 | -0.18452300 | 2.34239400  |
| H  | -0.95837100 | -1.73582300 | 1.91357900  |
| C  | -0.56193500 | 1.77145500  | -0.02663600 |
| H  | 0.32073300  | 2.10325900  | 0.53078800  |
| H  | -0.46287600 | 2.11819200  | -1.06066300 |
| H  | -1.43652700 | 2.26295400  | 0.41400300  |
| H  | 2.14587000  | 0.47340300  | -0.48577200 |

31

Me<sub>3</sub>Si–MeOSiMe<sub>3</sub><sup>+</sup>. Gibbs free energy: -933.23013

|    |             |             |             |
|----|-------------|-------------|-------------|
| O  | 0.03018600  | 0.24296400  | 0.49471700  |
| C  | 0.08438400  | 1.58626000  | 1.08070800  |
| H  | 0.57553300  | 1.51698000  | 2.04811800  |
| H  | -0.93372600 | 1.94390200  | 1.21829100  |
| Si | -1.58119300 | -0.18672400 | -0.22910700 |
| C  | -1.45774600 | -1.93073600 | -0.85460200 |
| H  | -1.35265200 | -2.65464800 | -0.04321900 |
| H  | -2.41166800 | -2.13375500 | -1.35598900 |
| H  | -0.66720700 | -2.09095200 | -1.59099000 |
| C  | -2.78129000 | -0.04811900 | 1.18514100  |
| H  | -3.02713900 | 0.98429100  | 1.44589100  |
| H  | -3.71215400 | -0.54470100 | 0.89022800  |
| H  | -2.39781100 | -0.55666700 | 2.07472500  |
| C  | -1.81052400 | 1.06738000  | -1.58160500 |
| H  | -1.82699900 | 2.09168100  | -1.19855300 |
| H  | -1.01976800 | 0.98798200  | -2.33363900 |
| H  | -2.76916500 | 0.88304400  | -2.07818700 |
| Si | 1.62987000  | -0.57631900 | 0.17855500  |
| C  | 2.86312900  | 0.33939800  | 1.22687200  |
| H  | 2.64560100  | 0.25009400  | 2.29505400  |
| H  | 3.83418700  | -0.13780300 | 1.05037900  |
| H  | 2.96478100  | 1.39574000  | 0.96684700  |
| C  | 1.43112400  | -2.33472500 | 0.74873500  |
| H  | 0.82931100  | -2.39126000 | 1.66072600  |
| H  | 0.99298800  | -2.98692600 | -0.00862300 |
| H  | 2.42902400  | -2.72023400 | 0.98534000  |
| C  | 1.91755500  | -0.34440900 | -1.64355100 |
| H  | 2.89796200  | -0.76169200 | -1.89822800 |
| H  | 1.17262700  | -0.85317800 | -2.26087100 |
| H  | 1.92566900  | 0.71732900  | -1.90786000 |
| H  | 0.62240100  | 2.24915400  | 0.40391500  |

21

EtOSiMe<sub>3</sub>. Gibbs free energy: -563.534775

|    |             |             |             |
|----|-------------|-------------|-------------|
| O  | 0.57457800  | -0.64272500 | -0.80600900 |
| C  | 1.86903500  | -0.82368300 | -0.25214800 |
| C  | 2.60886900  | 0.48658500  | -0.02205100 |
| H  | 2.42758300  | -1.44488500 | -0.95961300 |
| H  | 1.79907200  | -1.38456200 | 0.69015900  |
| H  | 3.63556200  | 0.28442300  | 0.29940200  |
| H  | 2.64376500  | 1.07519000  | -0.94377100 |
| H  | 2.12686600  | 1.08842600  | 0.75486000  |
| Si | -0.73655600 | 0.02487300  | 0.01129000  |
| C  | -2.25268300 | -0.70326000 | -0.81074100 |
| H  | -2.29026100 | -1.78946000 | -0.67944500 |
| H  | -3.16460600 | -0.27518900 | -0.38012700 |
| H  | -2.25388200 | -0.48810300 | -1.88461000 |
| C  | -0.64678900 | -0.44093300 | 1.82872500  |
| H  | 0.23320100  | -0.00544300 | 2.31451100  |

|   |             |             |             |
|---|-------------|-------------|-------------|
| H | -1.53400000 | -0.06873900 | 2.35280800  |
| H | -0.60689600 | -1.52740600 | 1.96107800  |
| C | -0.74908800 | 1.89440400  | -0.17528800 |
| H | 0.11253400  | 2.35890000  | 0.31470900  |
| H | -0.73204100 | 2.17837900  | -1.23301500 |
| H | -1.65780200 | 2.31336700  | 0.27208800  |

34

Me<sub>3</sub>Si–EtOSiMe<sub>3</sub><sup>+</sup>. Gibbs free energy: -972.51417

|    |             |             |             |
|----|-------------|-------------|-------------|
| O  | 0.00169400  | 0.36829100  | 0.26278600  |
| C  | -0.01697900 | 1.76768100  | 0.75843300  |
| C  | -0.38958100 | 2.74148300  | -0.33424200 |
| H  | 0.98166100  | 1.96516400  | 1.14824900  |
| H  | -0.70909700 | 1.78836000  | 1.59845400  |
| H  | -0.33053300 | 3.75249800  | 0.07786500  |
| H  | 0.29711900  | 2.67400200  | -1.17999500 |
| H  | -1.40865900 | 2.58652100  | -0.69462800 |
| Si | -1.59524500 | -0.45535900 | -0.03051400 |
| C  | -1.42211600 | -2.19579000 | 0.60635000  |
| H  | -0.79299400 | -2.24904400 | 1.49987600  |
| H  | -2.42415100 | -2.53571200 | 0.89102900  |
| H  | -1.03796200 | -2.88839500 | -0.14448900 |
| C  | -2.84324500 | 0.48310800  | 0.98229600  |
| H  | -2.96510100 | 1.53072600  | 0.69782900  |
| H  | -3.80640500 | -0.01334700 | 0.81523300  |
| H  | -2.62858300 | 0.42293100  | 2.05333500  |
| C  | -1.87717200 | -0.32222200 | -1.86320600 |
| H  | -1.98737000 | 0.71880800  | -2.17892600 |
| H  | -1.06550900 | -0.77341900 | -2.43998500 |
| H  | -2.80228700 | -0.85173300 | -2.11632100 |
| Si | 1.67035200  | -0.29678500 | -0.00707700 |
| C  | 2.38846800  | -0.45220700 | 1.70065600  |
| H  | 1.75311900  | -1.07475000 | 2.33753800  |
| H  | 3.36628400  | -0.93977600 | 1.62034800  |
| H  | 2.53911400  | 0.51305100  | 2.19152400  |
| C  | 1.50789100  | -1.93759600 | -0.86494100 |
| H  | 1.23795300  | -2.74365000 | -0.18037100 |
| H  | 0.81478000  | -1.93159400 | -1.70947200 |
| H  | 2.50231000  | -2.16373000 | -1.26749100 |
| C  | 2.52404000  | 0.95223400  | -1.09000000 |
| H  | 3.53449900  | 0.57829500  | -1.28991900 |
| H  | 2.01302300  | 1.06134900  | -2.05113000 |
| H  | 2.62589400  | 1.93698000  | -0.62663500 |

12

N-Me-acetamide. Gibbs free energy: -248.403202

|   |             |             |             |
|---|-------------|-------------|-------------|
| C | -0.95027000 | 0.84135200  | 0.07588500  |
| O | -1.44762700 | -0.28383700 | -0.03612400 |
| N | 0.35871000  | 1.01549200  | 0.35342400  |
| C | -1.78130800 | 2.09353800  | -0.08922300 |

|   |             |             |             |
|---|-------------|-------------|-------------|
| H | -1.20609900 | 3.01567300  | 0.01472700  |
| H | -2.25082300 | 2.07482500  | -1.07545600 |
| H | -2.57727700 | 2.08534800  | 0.65924600  |
| C | 1.26302400  | -0.10329200 | 0.54241200  |
| H | 1.29482600  | -0.73183700 | -0.35184400 |
| H | 2.26120200  | 0.28714200  | 0.73882200  |
| H | 0.94767800  | -0.72157300 | 1.38767000  |
| H | 0.72149200  | 1.95135600  | 0.43938400  |

25

Me<sub>3</sub>Si-N-Me-acetamide<sup>+</sup>. Gibbs free energy: -657.395714

|    |             |             |             |
|----|-------------|-------------|-------------|
| C  | -0.96924700 | 0.78713300  | -0.11600300 |
| O  | -1.43460800 | -0.41378800 | -0.15022800 |
| N  | 0.33117000  | 0.90901700  | -0.18424800 |
| C  | -1.84971600 | 1.98109900  | 0.02637200  |
| H  | -2.02847500 | 2.15603600  | 1.09239800  |
| H  | -1.39154500 | 2.87276000  | -0.39869500 |
| H  | -2.80764000 | 1.80682800  | -0.46125100 |
| C  | 1.08300400  | 2.16232100  | -0.15197600 |
| H  | 0.79327200  | 2.75982900  | 0.71298300  |
| H  | 2.13823500  | 1.91307100  | -0.06831300 |
| H  | 0.92223700  | 2.72860500  | -1.07134600 |
| Si | -3.05554100 | -1.11776600 | -0.06946400 |
| C  | -3.89897000 | -0.68454100 | -1.67279500 |
| H  | -4.10206700 | 0.38526600  | -1.77448300 |
| H  | -3.29757200 | -1.00715700 | -2.52794400 |
| H  | -4.85994800 | -1.20840100 | -1.72008400 |
| C  | -3.88827200 | -0.41907500 | 1.44361600  |
| H  | -4.79879400 | -0.99606500 | 1.63909200  |
| H  | -3.24309900 | -0.50464500 | 2.32339600  |
| H  | -4.18057300 | 0.62736200  | 1.32196100  |
| C  | -2.65059800 | -2.92352100 | 0.08141700  |
| H  | -2.09297300 | -3.12732500 | 1.00021900  |
| H  | -3.57685700 | -3.50698100 | 0.10858900  |
| H  | -2.05808100 | -3.26574200 | -0.77216800 |
| H  | 0.85027100  | 0.04209600  | -0.26979200 |

20

N-Me-piperidine. Gibbs free energy: -290.994701

|   |             |             |             |
|---|-------------|-------------|-------------|
| C | -1.83445800 | -1.04454200 | -1.16133100 |
| C | -0.30234300 | -1.05530600 | -1.13349400 |
| C | 0.24587400  | 0.37566100  | -1.15944200 |
| C | -0.39281400 | 1.21143500  | -0.04077000 |
| C | -2.38277100 | -0.14601400 | -0.04290200 |
| H | 1.33463100  | 0.37563800  | -1.03458200 |
| H | 0.03598200  | -1.55052800 | -0.21209200 |
| H | 0.09609000  | -1.63719300 | -1.97160400 |
| H | -2.18340000 | -0.68158600 | -2.13665200 |
| H | -2.23269300 | -2.05816900 | -1.03970100 |
| H | -0.07844200 | 0.79945000  | 0.92839300  |

|   |             |             |             |
|---|-------------|-------------|-------------|
| H | -0.03930300 | 2.24744000  | -0.08128400 |
| H | -2.11880300 | -0.59038300 | 0.92686900  |
| H | -3.47610800 | -0.09583000 | -0.08807500 |
| H | 0.03881900  | 0.83442200  | -2.13469100 |
| N | -1.85720600 | 1.22105500  | -0.05915500 |
| C | -2.41241900 | 2.03401300  | -1.13291800 |
| H | -3.50116000 | 2.07459200  | -1.02781600 |
| H | -2.02599500 | 3.05432900  | -1.04762100 |
| H | -2.18622000 | 1.67259900  | -2.14970100 |

33

Me<sub>3</sub>Si-N-Me-piperidine<sup>+</sup>. Gibbs free energy: -699.997892

|    |             |             |             |
|----|-------------|-------------|-------------|
| C  | -1.77701300 | -1.05242000 | -1.03952500 |
| C  | -0.25256800 | -0.95772000 | -1.10162000 |
| C  | 0.18847600  | 0.50238300  | -1.20442700 |
| C  | -0.41713400 | 1.35903700  | -0.09666400 |
| C  | -2.32425900 | -0.19514700 | 0.09450900  |
| H  | 1.27464100  | 0.58786400  | -1.10994500 |
| H  | 0.17437300  | -1.40508000 | -0.19527600 |
| H  | 0.13042800  | -1.52676500 | -1.95245000 |
| H  | -2.22471500 | -0.76501500 | -1.99649400 |
| H  | -2.09374100 | -2.08095300 | -0.84581500 |
| H  | -0.02447300 | 1.03963600  | 0.87306400  |
| H  | -0.16899000 | 2.41183400  | -0.23842400 |
| H  | -1.92752200 | -0.56114300 | 1.04429300  |
| H  | -3.41452500 | -0.23471900 | 0.13933300  |
| H  | -0.06649000 | 0.91018100  | -2.18777900 |
| N  | -1.92462900 | 1.25923000  | -0.01076300 |
| C  | -2.55590500 | 1.89074900  | -1.21069400 |
| H  | -3.63050700 | 1.71407100  | -1.18620300 |
| H  | -2.35728400 | 2.96279000  | -1.20133200 |
| H  | -2.14836100 | 1.46674500  | -2.12573300 |
| Si | -2.53159200 | 2.19943100  | 1.55586400  |
| C  | -1.65022800 | 3.84136700  | 1.54003400  |
| H  | -2.09998000 | 4.45935100  | 2.32510800  |
| H  | -0.58549800 | 3.74147200  | 1.76707500  |
| H  | -1.76114900 | 4.38329800  | 0.59665700  |
| C  | -4.37656500 | 2.36773700  | 1.36283500  |
| H  | -4.87427000 | 1.41256400  | 1.17313400  |
| H  | -4.76967400 | 2.75726700  | 2.30858200  |
| H  | -4.65073400 | 3.07458900  | 0.57552100  |
| C  | -2.05872500 | 1.15717100  | 3.02615000  |
| H  | -2.22632400 | 1.76726500  | 3.92083200  |
| H  | -2.67615500 | 0.25988600  | 3.11966000  |
| H  | -1.00485800 | 0.86521300  | 3.02634400  |

20

N,N-dimethylaniline. Gibbs free energy: -365.980647

|   |             |             |             |
|---|-------------|-------------|-------------|
| N | -1.56974000 | -0.00002700 | -0.17248500 |
| C | -2.28549800 | -1.23975800 | 0.06809200  |

|   |             |             |             |
|---|-------------|-------------|-------------|
| H | -3.35492400 | -1.06059800 | -0.04420900 |
| H | -2.00484600 | -2.00243300 | -0.66448400 |
| H | -2.10505000 | -1.64515200 | 1.07535100  |
| C | -2.28568300 | 1.23969900  | 0.06745800  |
| H | -2.00276400 | 2.00280700  | -0.66374600 |
| H | -3.35486000 | 1.06104300  | -0.04790700 |
| H | -2.10772300 | 1.64431000  | 1.07553000  |
| C | -0.18633700 | 0.00008500  | -0.07876600 |
| C | 0.54697400  | 1.20641500  | -0.03590200 |
| C | 0.54695500  | -1.20638100 | -0.03623000 |
| C | 1.93758800  | 1.19669800  | 0.01846900  |
| H | 0.03671300  | 2.16164900  | -0.04571700 |
| C | 1.93746800  | -1.19673700 | 0.01809900  |
| H | 0.03647600  | -2.16150300 | -0.04648400 |
| C | 2.65167500  | 0.00000800  | 0.04309200  |
| H | 2.46533100  | 2.14578600  | 0.04732200  |
| H | 2.46529500  | -2.14578400 | 0.04666600  |
| H | 3.73568500  | -0.00010500 | 0.08920500  |

33

Me<sub>3</sub>Si-N,N,-dimethylaniline<sup>+</sup>. Gibbs free energy: -774.966081

|    |             |             |             |
|----|-------------|-------------|-------------|
| N  | 0.48150500  | 0.65197700  | -0.66381100 |
| C  | 0.77239900  | 0.40713300  | -2.11754700 |
| H  | 1.80344800  | 0.69430400  | -2.31886000 |
| H  | 0.64684600  | -0.64136600 | -2.36850000 |
| H  | 0.09411200  | 1.01536700  | -2.71751800 |
| C  | 0.79343000  | 2.09689400  | -0.40432400 |
| H  | 0.79574200  | 2.30823600  | 0.66327300  |
| H  | 1.78133100  | 2.31036700  | -0.80677300 |
| H  | 0.05285500  | 2.71942500  | -0.90822800 |
| C  | -0.93082900 | 0.31770400  | -0.33565200 |
| C  | -1.66800000 | 1.12086700  | 0.53346500  |
| C  | -1.50422300 | -0.83879300 | -0.86588700 |
| C  | -2.97452200 | 0.76686800  | 0.86286600  |
| H  | -1.25516500 | 2.01985300  | 0.97014600  |
| C  | -2.80981300 | -1.18320700 | -0.52930500 |
| H  | -0.95872300 | -1.48723200 | -1.53842900 |
| C  | -3.55152100 | -0.38337200 | 0.33497100  |
| H  | -3.53805200 | 1.40287900  | 1.53664700  |
| H  | -3.24288600 | -2.08293900 | -0.95238100 |
| H  | -4.57052000 | -0.65186400 | 0.59125300  |
| Si | 1.64023600  | -0.43501800 | 0.46231300  |
| C  | 0.97825500  | -0.22387700 | 2.18743000  |
| H  | -0.00921600 | -0.67837700 | 2.30078900  |
| H  | 1.66733400  | -0.73852300 | 2.86646400  |
| H  | 0.92582100  | 0.82088200  | 2.50500800  |
| C  | 3.34550200  | 0.27771500  | 0.22730900  |
| H  | 3.45037800  | 1.27141800  | 0.66999200  |
| H  | 4.04656000  | -0.38824200 | 0.74276400  |

|   |            |             |             |
|---|------------|-------------|-------------|
| H | 3.65116600 | 0.31945400  | -0.82192000 |
| C | 1.51308400 | -2.18887900 | -0.14507400 |
| H | 2.23203300 | -2.77130300 | 0.44281900  |
| H | 0.52547900 | -2.62333000 | 0.02530200  |
| H | 1.78506000 | -2.30691300 | -1.19705900 |

13

THF. Gibbs free energy: -232.310676

|   |             |             |             |
|---|-------------|-------------|-------------|
| C | 1.12808200  | 0.47306800  | 0.16394000  |
| O | -0.00483400 | 1.20061400  | -0.29489000 |
| C | -1.13650700 | 0.46194100  | 0.15038500  |
| C | -0.76725400 | -1.01877900 | -0.04175300 |
| C | 0.78108700  | -1.00627400 | -0.05985100 |
| H | 1.99880100  | 0.81670000  | -0.39759200 |
| H | 1.29122000  | 0.67895700  | 1.23272200  |
| H | -1.32496700 | 0.68206100  | 1.21191900  |
| H | -1.99981500 | 0.78485100  | -0.43451400 |
| H | -1.17010600 | -1.63639700 | 0.76447700  |
| H | -1.16549400 | -1.39993900 | -0.98517900 |
| H | 1.21475300  | -1.64162600 | 0.71603500  |
| H | 1.16183500  | -1.34926000 | -1.02508000 |

26

Me<sub>3</sub>Si-THF<sup>+</sup>. Gibbs free energy: -641.296209

|    |             |             |             |
|----|-------------|-------------|-------------|
| C  | 1.27624500  | -1.20386400 | -0.22174900 |
| O  | 0.45576800  | 0.03340700  | -0.21402100 |
| C  | 1.29670900  | 1.22730900  | 0.04272100  |
| C  | 2.70100500  | 0.71568900  | -0.20373300 |
| C  | 2.63113300  | -0.73725800 | 0.27447500  |
| H  | 0.78593500  | -1.92785700 | 0.42802800  |
| H  | 1.28507900  | -1.55303500 | -1.25442900 |
| H  | 0.96244300  | 1.99898300  | -0.64760600 |
| H  | 1.12691500  | 1.52469400  | 1.07932500  |
| H  | 2.94263100  | 0.76571600  | -1.26849000 |
| H  | 3.43276800  | 1.30507200  | 0.35007300  |
| H  | 3.43055400  | -1.35452800 | -0.13711000 |
| H  | 2.67602700  | -0.78852700 | 1.36536300  |
| Si | -1.34653900 | -0.00106400 | 0.02493700  |
| C  | -1.87276300 | 1.69720100  | -0.50610400 |
| H  | -2.96680800 | 1.74293600  | -0.47340900 |
| H  | -1.49069700 | 2.47620000  | 0.15946700  |
| H  | -1.55924300 | 1.91385200  | -1.53132300 |
| C  | -1.56951000 | -0.35034600 | 1.83521300  |
| H  | -2.64013600 | -0.40198800 | 2.06080400  |
| H  | -1.12211800 | -1.30611500 | 2.12328100  |
| H  | -1.13374800 | 0.44184700  | 2.45090200  |
| C  | -1.87893400 | -1.37130100 | -1.10726900 |
| H  | -2.97324200 | -1.41909300 | -1.10805300 |
| H  | -1.54841500 | -1.18883100 | -2.13376700 |
| H  | -1.50586700 | -2.34626700 | -0.78133700 |

16

Tetrahydropyran. Gibbs free energy: -271.594208

|   |             |             |             |
|---|-------------|-------------|-------------|
| C | -4.10133100 | -0.00164400 | -1.23270900 |
| C | -2.57012700 | -0.02115200 | -1.26184900 |
| C | -2.02932600 | 1.41184800  | -1.23123100 |
| C | -2.64874500 | 2.18561000  | -0.07159400 |
| C | -4.59585500 | 0.85531000  | -0.07162400 |
| H | -0.93868900 | 1.41801100  | -1.12776400 |
| H | -2.19841400 | -0.56627000 | -0.38333600 |
| H | -2.20575600 | -0.55291200 | -2.14647700 |
| H | -4.48656600 | 0.41615500  | -2.17112100 |
| H | -4.50669300 | -1.01448900 | -1.13240100 |
| H | -2.32048300 | 1.75019300  | 0.88706300  |
| H | -2.35273300 | 3.23730100  | -0.08847000 |
| H | -4.30958200 | 0.39069600  | 0.88668200  |
| H | -5.68311200 | 0.96218500  | -0.08783400 |
| H | -2.27379200 | 1.92223500  | -2.17106500 |
| O | -4.06920200 | 2.17467000  | -0.12841800 |

29

Me<sub>3</sub>Si-tetrahydropyran<sup>+</sup>. Gibbs free energy: -680.575023

|    |             |             |             |
|----|-------------|-------------|-------------|
| C  | -4.32672800 | 0.05958000  | -0.98501900 |
| C  | -2.90656100 | 0.08321200  | -1.55701800 |
| C  | -2.42489600 | 1.52418600  | -1.74501000 |
| C  | -2.56728700 | 2.32040700  | -0.46401800 |
| C  | -4.41105800 | 0.88321500  | 0.28241900  |
| H  | -1.37005600 | 1.55092600  | -2.03424300 |
| H  | -2.22960300 | -0.44424800 | -0.87406800 |
| H  | -2.87733600 | -0.44660300 | -2.51207800 |
| H  | -5.04411300 | 0.44550200  | -1.71782600 |
| H  | -4.63158900 | -0.96179900 | -0.73815800 |
| H  | -1.96669800 | 1.91922200  | 0.35557500  |
| H  | -2.33482300 | 3.37716800  | -0.59014100 |
| H  | -3.74348400 | 0.51860200  | 1.06692400  |
| H  | -5.41920500 | 0.96746300  | 0.67953400  |
| H  | -2.99367000 | 2.01565000  | -2.54162500 |
| O  | -3.96459900 | 2.26226700  | 0.00636400  |
| Si | -5.04397000 | 3.73232800  | -0.15301700 |
| C  | -4.86497000 | 4.24188400  | -1.93034100 |
| H  | -5.49421600 | 5.12200000  | -2.10281300 |
| H  | -3.83824300 | 4.51650300  | -2.18856700 |
| H  | -5.20102700 | 3.44982000  | -2.60571200 |
| C  | -6.74185300 | 3.12505400  | 0.28239400  |
| H  | -6.80756100 | 2.74777700  | 1.30656800  |
| H  | -7.41730900 | 3.98521400  | 0.20719300  |
| H  | -7.10518100 | 2.36260700  | -0.41243000 |
| C  | -4.31582800 | 4.91732800  | 1.07503500  |
| H  | -4.88256800 | 5.85419800  | 1.04418100  |
| H  | -4.38048200 | 4.51242500  | 2.08891800  |



H -3.27065600 5.15488500 0.85790400  
13

Tetrahydrothiophene. Gibbs free energy: -555.302344

C 0.05391700 -1.33954400 0.13640800  
C 0.05348000 1.33964500 -0.13673200  
C -1.28006500 0.71357700 0.27455900  
C -1.28001800 -0.71379800 -0.27437100  
H 0.34490700 -2.16966400 -0.50957400  
H 0.02131800 -1.69372400 1.16972200  
H 0.34470500 2.16994100 0.50890400  
H 0.02083900 1.69323500 -1.17023100  
H -1.35886600 0.68912400 1.36739300  
H -2.11857000 1.30177200 -0.11007500  
H -2.11821900 -1.30225600 0.11049000  
H -1.35915000 -0.68932400 -1.36718400  
S 1.30869700 0.00010100 0.00008600  
26

Me<sub>3</sub>Si-tetrahydrothiophene<sup>+</sup>. Gibbs free energy: -964.279144

C 1.47570000 1.36969300 -0.10904100  
C 1.44313000 -1.32460100 -0.47333900  
C 2.36699200 -0.80758000 0.62842700  
C 2.75996300 0.62122400 0.25266700  
H 1.63040700 2.21458600 -0.77859400  
H 0.92930800 1.70192900 0.77505300  
H 0.77002900 -2.12233500 -0.15700600  
H 1.99083600 -1.65157800 -1.35759700  
H 1.84969800 -0.81828500 1.59214800  
H 3.23965700 -1.45964700 0.70891600  
H 3.26049800 1.13471500 1.07670300  
H 3.44038700 0.61440300 -0.60401500  
S 0.44511200 0.13272900 -1.01646900  
Si -1.48855600 -0.00540300 0.16811000  
C -2.21130900 1.69280300 -0.07050600  
H -2.37605500 1.91218500 -1.12898300  
H -3.18036400 1.73087300 0.43886400  
H -1.57857000 2.47452700 0.35944800  
C -2.39572900 -1.37376700 -0.70711300  
H -1.87274500 -2.33091000 -0.62651400  
H -3.37842900 -1.49135300 -0.23731100  
H -2.55044900 -1.14221400 -1.76438200  
C -1.03153200 -0.40330800 1.92902400  
H -1.95945000 -0.42979400 2.51188600  
H -0.55748000 -1.38437500 2.02100500  
H -0.38256700 0.35247600 2.37962900  
18

4H-chromene. Gibbs free energy: -422.746599

C -3.61273600 -0.60064200 -0.04612800  
C -2.26015500 -0.89762800 -0.22761100

|   |             |             |             |
|---|-------------|-------------|-------------|
| C | -1.28742900 | 0.10146300  | -0.22877900 |
| C | -1.66218500 | 1.42689800  | -0.04504400 |
| C | -3.00752500 | 1.75105900  | 0.13987900  |
| C | -3.96329900 | 0.74020100  | 0.13736200  |
| C | -4.66155000 | -1.69106800 | -0.04640800 |
| H | -0.24844200 | -0.17567000 | -0.37399500 |
| H | -0.90494300 | 2.20408800  | -0.04545400 |
| H | -3.30720400 | 2.78370800  | 0.28530000  |
| H | -5.01235600 | 0.98607500  | 0.28179600  |
| H | -5.40069600 | -1.49865000 | -0.83487000 |
| C | -4.02853400 | -3.03788100 | -0.24508800 |
| H | -4.65498100 | -3.92278200 | -0.25859600 |
| C | -2.71781200 | -3.19670000 | -0.40798400 |
| H | -2.23120500 | -4.15276000 | -0.55378700 |
| O | -1.79899900 | -2.18016400 | -0.41422600 |
| H | -5.22068300 | -1.67022800 | 0.89787700  |

31

Me<sub>3</sub>Si-4H-chromene<sup>+</sup>. Gibbs free energy: -831.703501

|    |             |             |             |
|----|-------------|-------------|-------------|
| C  | -3.01911500 | -0.31914500 | -0.28430400 |
| C  | -2.29638900 | -0.77944900 | -1.37534900 |
| C  | -1.86455000 | 0.02132300  | -2.41771100 |
| C  | -2.12407300 | 1.38656600  | -2.33395000 |
| C  | -2.81881800 | 1.89957800  | -1.23910800 |
| C  | -3.27657400 | 1.05152400  | -0.23401700 |
| C  | -3.55182400 | -1.30086600 | 0.73101900  |
| H  | -1.34992800 | -0.40632100 | -3.26932600 |
| H  | -1.79203100 | 2.04325400  | -3.13004200 |
| H  | -3.02172900 | 2.96307700  | -1.17733800 |
| H  | -3.84695800 | 1.45012300  | 0.59906600  |
| H  | -4.49022600 | -0.93126500 | 1.14968100  |
| C  | -3.76311800 | -2.64176000 | 0.08595300  |
| H  | -4.54697100 | -3.30111700 | 0.44056000  |
| C  | -3.04026100 | -3.03820700 | -0.94681100 |
| H  | -3.11135900 | -3.94871800 | -1.52230700 |
| O  | -1.99669200 | -2.18161000 | -1.44128800 |
| Si | -0.24174400 | -2.74481900 | -0.99614800 |
| C  | 0.86206100  | -1.77514700 | -2.12048200 |
| H  | 0.84722700  | -0.70379000 | -1.90867700 |
| H  | 1.88251400  | -2.13697200 | -1.94706700 |
| H  | 0.62575700  | -1.94465300 | -3.17424900 |
| C  | -0.12431800 | -2.30150700 | 0.79920000  |
| H  | 0.88365800  | -2.54807600 | 1.15032700  |
| H  | -0.27914800 | -1.23091800 | 0.96257800  |
| H  | -0.83641200 | -2.87091600 | 1.40280200  |
| C  | -0.31815500 | -4.55498900 | -1.38138600 |
| H  | 0.69778100  | -4.95386500 | -1.28135100 |
| H  | -0.96147100 | -5.10924900 | -0.69397700 |
| H  | -0.64450200 | -4.73463400 | -2.40976300 |

H -2.85604100 -1.40195600 1.57381000  
20

Chroman. Gibbs free energy: -423.956906

C -3.62439300 -0.61558000 0.11476300  
C -2.29107000 -0.96058800 -0.14806200  
C -1.33047400 0.02484700 -0.39488300  
C -1.68866800 1.36705300 -0.37136500  
C -3.00914900 1.73359400 -0.10171700  
C -3.95711900 0.74271800 0.13306700  
C -4.66414900 -1.68773500 0.35160500  
H -0.30945700 -0.28090300 -0.60022900  
H -0.93662600 2.12643800 -0.56185700  
H -3.29578300 2.78003900 -0.08108100  
H -4.99045300 1.01874700 0.32970000  
H -5.60150800 -1.40966500 -0.13984700  
C -4.16488700 -3.03967900 -0.15610400  
H -4.79545600 -3.85339400 0.21325600  
H -4.18902500 -3.07191800 -1.25128000  
C -2.73753000 -3.25254100 0.31667400  
H -2.32715200 -4.20265500 -0.02802500  
H -2.68743700 -3.22482000 1.41379200  
O -1.85682500 -2.25372300 -0.20580900  
H -4.87974200 -1.75861700 1.42521300

33

Me<sub>3</sub>Si-chroman<sup>+</sup>. Gibbs free energy: -832.923016

C -3.32166000 -0.66294000 -0.36235400  
C -2.01733700 -0.83860800 0.08427400  
C -1.12181400 0.19971800 0.29113300  
C -1.52903100 1.49215300 -0.02013200  
C -2.81790200 1.71380500 -0.50538000  
C -3.70178700 0.65124400 -0.65625500  
C -4.31588000 -1.79985100 -0.44927400  
H -0.13725000 0.00407400 0.69766600  
H -0.84382400 2.31945500 0.12643900  
H -3.13983400 2.72055500 -0.74880100  
H -4.71339600 0.83289900 -1.00737400  
H -4.75238900 -1.83191800 -1.45111500  
C -3.71967000 -3.16690000 -0.08956400  
H -4.48844300 -3.82514500 0.32266600  
H -3.32240400 -3.66882300 -0.97702900  
C -2.61582600 -3.02338000 0.93154200  
H -2.12801100 -3.95884100 1.19192100  
H -2.92568400 -2.50525200 1.84008700  
O -1.55370600 -2.16477600 0.34946700  
Si -0.29939000 -2.86179700 -0.85997500  
C -0.93603800 -2.31761500 -2.51485400  
H -0.24472000 -2.68586700 -3.28110800  
H -1.92661700 -2.72592100 -2.73253500

|   |             |             |             |
|---|-------------|-------------|-------------|
| H | -0.97805800 | -1.22807100 | -2.59569700 |
| C | 1.30924500  | -2.09498600 | -0.34784100 |
| H | 2.11511000  | -2.68849900 | -0.79456100 |
| H | 1.41683600  | -1.06795000 | -0.70394000 |
| H | 1.44062300  | -2.11943900 | 0.73754000  |
| C | -0.36122300 | -4.69034400 | -0.55432200 |
| H | 0.36888700  | -5.14084900 | -1.23699900 |
| H | -0.05864400 | -4.94969000 | 0.46410700  |
| H | -1.33214400 | -5.14160400 | -0.77276000 |
| H | -5.13523200 | -1.56675600 | 0.23902400  |

20

Isochroman. Gibbs free energy: -423.949914

|   |             |             |             |
|---|-------------|-------------|-------------|
| C | -3.60001000 | -0.57194200 | 0.09746600  |
| C | -2.26161000 | -0.91008400 | -0.13232800 |
| C | -1.32007800 | 0.09613900  | -0.36510700 |
| C | -1.69739800 | 1.43537800  | -0.36703300 |
| C | -3.03095400 | 1.77723600  | -0.13497700 |
| C | -3.97046500 | 0.77706000  | 0.09459600  |
| C | -4.61551600 | -1.66232700 | 0.35643700  |
| H | -0.28141600 | -0.17259400 | -0.54298400 |
| H | -0.95648700 | 2.20852900  | -0.54514300 |
| H | -3.33567100 | 2.81928200  | -0.13552200 |
| H | -5.01055200 | 1.03983200  | 0.27153900  |
| H | -5.55622500 | -1.43751200 | -0.15747600 |
| C | -4.08661900 | -3.01534600 | -0.10058400 |
| H | -4.71186900 | -3.83088600 | 0.26754100  |
| H | -4.05753700 | -3.06981800 | -1.19987700 |
| C | -1.83672500 | -2.36374400 | -0.16595700 |
| H | -1.65493200 | -2.66606400 | -1.21040900 |
| H | -0.90405700 | -2.50191900 | 0.38680200  |
| O | -2.78337600 | -3.23493500 | 0.42060000  |
| H | -4.83856300 | -1.70803400 | 1.42923800  |

33

Me<sub>3</sub>Si–isochroman<sup>+</sup>. Gibbs free energy: -832.927239

|   |             |             |             |
|---|-------------|-------------|-------------|
| C | -3.13099100 | -0.99031100 | 1.60123300  |
| C | -1.93762800 | -1.17173900 | 0.89550900  |
| C | -0.73412900 | -0.68067500 | 1.40704500  |
| C | -0.71232900 | -0.00345400 | 2.62070500  |
| C | -1.89867500 | 0.17793500  | 3.33248800  |
| C | -3.09490100 | -0.31587000 | 2.82472700  |
| C | -4.43758200 | -1.54601700 | 1.07766900  |
| H | 0.18948900  | -0.83426200 | 0.85585000  |
| H | 0.22528100  | 0.37510500  | 3.01365700  |
| H | -1.88965100 | 0.70175600  | 4.28261100  |
| H | -4.01902300 | -0.17634300 | 3.37862200  |
| H | -5.23435100 | -0.80241000 | 1.17418300  |
| C | -4.34296500 | -1.93986300 | -0.37899100 |
| H | -5.16404700 | -2.56792900 | -0.71510700 |

|    |             |             |             |
|----|-------------|-------------|-------------|
| H  | -4.25206300 | -1.08168000 | -1.04665100 |
| C  | -1.92489500 | -1.87488500 | -0.43676500 |
| H  | -1.94233300 | -1.18299400 | -1.28219000 |
| H  | -1.06090700 | -2.53090200 | -0.54666700 |
| O  | -3.11021600 | -2.71926300 | -0.59074100 |
| Si | -2.96742000 | -4.52071000 | -0.20178900 |
| C  | -2.16437000 | -4.57007100 | 1.47131900  |
| H  | -2.04949500 | -5.61906200 | 1.76612000  |
| H  | -1.16957500 | -4.11582700 | 1.47068200  |
| H  | -2.77562400 | -4.07165900 | 2.22896800  |
| C  | -1.91967500 | -5.14070100 | -1.60004700 |
| H  | -1.78272900 | -6.22067600 | -1.47855600 |
| H  | -2.40964200 | -4.96521000 | -2.56169200 |
| H  | -0.92696100 | -4.68330900 | -1.62029100 |
| C  | -4.72147600 | -5.12022600 | -0.23555400 |
| H  | -5.20079100 | -4.94506200 | -1.20263700 |
| H  | -4.69166700 | -6.20397000 | -0.07508700 |
| H  | -5.33585100 | -4.69026200 | 0.56004300  |
| H  | -4.74307700 | -2.40944300 | 1.68049400  |

15

N,N-dimethylacetamide. Gibbs free energy: -287.669423

|   |             |             |             |
|---|-------------|-------------|-------------|
| C | -1.00726100 | 0.84669100  | 0.16022800  |
| O | -1.59511900 | -0.23631300 | 0.27323200  |
| N | 0.34381800  | 0.92430400  | 0.04744700  |
| C | -1.78784200 | 2.14551200  | 0.15344900  |
| H | -1.53717300 | 2.76337200  | 1.02095300  |
| H | -1.58722700 | 2.73159400  | -0.74760600 |
| H | -2.84840500 | 1.90088700  | 0.19256900  |
| C | 1.07015400  | 2.16537800  | -0.17237700 |
| H | 0.54315200  | 3.01752000  | 0.25298400  |
| H | 2.04273800  | 2.09414100  | 0.32069900  |
| H | 1.23617100  | 2.34499700  | -1.24135800 |
| C | 1.14032000  | -0.28817300 | -0.04697500 |
| H | 0.49653900  | -1.15281200 | 0.09945000  |
| H | 1.61590400  | -0.35421300 | -1.03216600 |
| H | 1.92223500  | -0.28245700 | 0.71871400  |

28

Me<sub>3</sub>Si-N,N-dimethylacetamide<sup>+</sup>. Gibbs free energy: -696.668878

|   |             |             |             |
|---|-------------|-------------|-------------|
| C | -0.21288200 | 0.45148200  | 0.20668500  |
| O | -0.23742800 | -0.79264300 | -0.13716800 |
| N | 0.51218200  | 1.26822800  | -0.51723600 |
| C | -0.96540100 | 0.94358600  | 1.40109000  |
| H | -0.28541600 | 1.00245200  | 2.25697800  |
| H | -1.39232400 | 1.93112500  | 1.22856100  |
| H | -1.77118300 | 0.25593100  | 1.64874800  |
| C | 0.63582300  | 2.69292000  | -0.18861600 |
| H | 0.75933400  | 2.83590100  | 0.88379300  |
| H | 1.52309800  | 3.07500400  | -0.69032800 |

|    |             |             |             |
|----|-------------|-------------|-------------|
| H  | -0.23941800 | 3.24175100  | -0.54411400 |
| C  | 1.23108400  | 0.81963700  | -1.71243200 |
| H  | 2.30517900  | 0.88956700  | -1.52879100 |
| H  | 0.96360500  | -0.20579700 | -1.94893000 |
| H  | 0.96086500  | 1.47508200  | -2.54208600 |
| Si | -0.99427500 | -2.25741800 | 0.47889400  |
| C  | -0.51902300 | -2.41978100 | 2.27360200  |
| H  | 0.55515700  | -2.26271000 | 2.41149600  |
| H  | -1.06064500 | -1.72389700 | 2.91996800  |
| H  | -0.75383500 | -3.43580100 | 2.60937300  |
| C  | -0.20770000 | -3.54397300 | -0.60606200 |
| H  | -0.62248000 | -4.52968900 | -0.37080200 |
| H  | -0.40075700 | -3.33824300 | -1.66311400 |
| H  | 0.87433100  | -3.58365000 | -0.44959700 |
| C  | -2.82659600 | -2.08016400 | 0.19039500  |
| H  | -3.03360100 | -1.83769500 | -0.85627800 |
| H  | -3.31347800 | -3.03538100 | 0.41610800  |
| H  | -3.28826400 | -1.31709800 | 0.82338000  |

19

N-acetyl-pyrrolidine. Gibbs free energy: -365.04442

|   |             |             |             |
|---|-------------|-------------|-------------|
| C | -1.90525400 | 0.95986600  | 0.16227400  |
| C | -2.26318600 | 3.16184300  | -0.82106100 |
| C | -1.96419700 | 3.30483700  | 0.67277800  |
| C | -2.36996700 | 1.94057600  | 1.24087900  |
| H | -2.51865900 | 0.05811300  | 0.09979600  |
| H | -0.86465700 | 0.64988100  | 0.31634900  |
| H | -1.62009300 | 3.79134200  | -1.44061300 |
| H | -3.30862700 | 3.41291400  | -1.04106300 |
| H | -0.89210600 | 3.47058400  | 0.82271900  |
| H | -2.50444200 | 4.14023600  | 1.12251400  |
| H | -1.91733000 | 1.73000800  | 2.21186400  |
| H | -3.45807500 | 1.88721100  | 1.35299000  |
| N | -2.01618900 | 1.73756300  | -1.07534700 |
| C | -1.90683800 | 1.15651400  | -2.28622900 |
| O | -1.68222000 | -0.05675600 | -2.40512800 |
| C | -2.06445800 | 2.05705700  | -3.49181200 |
| H | -2.99070500 | 2.63665700  | -3.43993300 |
| H | -1.23262000 | 2.76587100  | -3.55317700 |
| H | -2.07199300 | 1.44147700  | -4.39062900 |

32

Me<sub>3</sub>Si-N-acetyl-pyrrolidine<sup>+</sup>. Gibbs free energy: -774.043998

|   |             |            |             |
|---|-------------|------------|-------------|
| C | -2.05936000 | 1.98297200 | 0.82640500  |
| C | -2.02938400 | 3.54976800 | -1.05968900 |
| C | -1.92140900 | 4.31167500 | 0.26126800  |
| C | -2.55487900 | 3.35565200 | 1.27622000  |
| H | -2.74441300 | 1.16477900 | 1.04969200  |
| H | -1.07663000 | 1.74217200 | 1.24236100  |
| H | -1.23526600 | 3.79579300 | -1.76489500 |

|    |             |             |             |
|----|-------------|-------------|-------------|
| H  | -3.00115700 | 3.70534600  | -1.53795000 |
| H  | -0.86911200 | 4.48575000  | 0.50506200  |
| H  | -2.42561600 | 5.27719800  | 0.20659800  |
| H  | -2.26441600 | 3.57028000  | 2.30535900  |
| H  | -3.64622400 | 3.40091800  | 1.21064100  |
| N  | -1.92556000 | 2.13500200  | -0.63811100 |
| C  | -1.72056800 | 1.12293700  | -1.43353500 |
| O  | -1.60665400 | -0.03875600 | -0.87459000 |
| Si | -1.34438000 | -1.67807700 | -1.45312900 |
| C  | -1.09046800 | -2.58101300 | 0.15061800  |
| H  | -0.92557900 | -3.64587600 | -0.04354000 |
| H  | -0.21738100 | -2.19286600 | 0.68350400  |
| H  | -1.96660800 | -2.48465800 | 0.79863300  |
| C  | 0.17330700  | -1.66481800 | -2.53471700 |
| H  | 0.46693800  | -2.70092500 | -2.73641000 |
| H  | 0.00247700  | -1.17597100 | -3.49771600 |
| H  | 1.01170700  | -1.17098900 | -2.03389800 |
| C  | -2.89878800 | -2.18903600 | -2.34585900 |
| H  | -2.85186700 | -3.26461700 | -2.54908600 |
| H  | -3.78327400 | -2.00174400 | -1.72968300 |
| H  | -3.02682800 | -1.67813900 | -3.30449300 |
| C  | -1.59166000 | 1.30214300  | -2.90970400 |
| H  | -2.13187800 | 2.18065300  | -3.25877200 |
| H  | -0.53254300 | 1.41990300  | -3.16003000 |
| H  | -1.97541800 | 0.42485200  | -3.42953700 |

14

Benzaldehyde. Gibbs free energy: -345.399467

|   |             |             |             |
|---|-------------|-------------|-------------|
| C | -0.32843800 | -1.39166000 | 0.00167400  |
| C | 1.06576500  | -1.38845600 | 0.00224300  |
| C | 1.75210800  | -0.17703100 | 0.00181000  |
| C | 1.04437500  | 1.02911100  | 0.00078900  |
| C | -0.35644900 | 1.02135000  | 0.00022100  |
| C | -1.03947800 | -0.18806300 | 0.00067200  |
| H | -0.86520300 | -2.33510900 | 0.00201900  |
| H | 1.61301500  | -2.32517100 | 0.00302400  |
| H | 2.83904600  | -0.16436400 | 0.00226700  |
| H | -0.89218400 | 1.96522200  | -0.00056600 |
| H | -2.12449600 | -0.19960300 | 0.00023700  |
| C | 1.79884400  | 2.29905900  | 0.00032500  |
| O | 1.29198400  | 3.40672100  | -0.00065300 |
| H | 2.90054500  | 2.19094100  | 0.00087600  |

27

Me<sub>3</sub>Si-Benzaldehyde<sup>+</sup>. Gibbs free energy: -754.379844

|   |             |             |             |
|---|-------------|-------------|-------------|
| C | -0.43026400 | -1.22261500 | 0.09573300  |
| C | 0.78682700  | -1.31045600 | -0.58207900 |
| C | 1.58384500  | -0.18254700 | -0.70172400 |
| C | 1.15465800  | 1.03490100  | -0.13701500 |
| C | -0.07646200 | 1.11635500  | 0.54767200  |

|    |             |             |             |
|----|-------------|-------------|-------------|
| C  | -0.86270500 | -0.01521900 | 0.65933300  |
| H  | -1.05386800 | -2.10583000 | 0.18765000  |
| H  | 1.10587100  | -2.25230600 | -1.01264200 |
| H  | 2.53284800  | -0.23322500 | -1.22645600 |
| H  | -0.39239200 | 2.06087900  | 0.97647400  |
| H  | -1.81205500 | 0.03021500  | 1.18025700  |
| C  | 1.99771600  | 2.17220500  | -0.28681500 |
| O  | 1.69462700  | 3.30200400  | 0.18521000  |
| H  | 2.94088800  | 2.06410900  | -0.83113400 |
| Si | 2.60669300  | 4.85791000  | 0.09068300  |
| C  | 1.27450200  | 6.04126900  | -0.42300200 |
| H  | 1.69928700  | 7.04572300  | -0.52244000 |
| H  | 0.84345600  | 5.75771000  | -1.38739000 |
| H  | 0.47590600  | 6.08135300  | 0.32297400  |
| C  | 3.93652100  | 4.59652300  | -1.18265500 |
| H  | 4.67085500  | 3.84407900  | -0.88055800 |
| H  | 3.52201700  | 4.32488000  | -2.15824600 |
| H  | 4.47268400  | 5.54400900  | -1.30672200 |
| C  | 3.22507500  | 5.06940900  | 1.82730300  |
| H  | 3.74014000  | 6.03177200  | 1.91575600  |
| H  | 2.39848400  | 5.06078700  | 2.54348000  |
| H  | 3.93237800  | 4.27921800  | 2.09494300  |

23

Benzaldehyde dimethylacetal. Gibbs free energy: -500.322804

|   |             |             |             |
|---|-------------|-------------|-------------|
| C | -0.48381100 | -1.12231800 | -0.03760200 |
| C | 0.25214100  | -0.84128500 | 1.11577200  |
| C | 1.02977400  | 0.31068000  | 1.18397800  |
| C | 1.07452200  | 1.19307500  | 0.10153900  |
| C | 0.34142100  | 0.90835100  | -1.04887200 |
| C | -0.43873300 | -0.24677800 | -1.11985800 |
| H | -1.08622100 | -2.02383700 | -0.09152100 |
| H | 0.22143600  | -1.52477000 | 1.95864300  |
| H | 1.61023600  | 0.52821100  | 2.07526700  |
| H | 0.37969300  | 1.59005600  | -1.89476100 |
| H | -1.00412200 | -0.46258800 | -2.02102600 |
| C | 1.92357600  | 2.44372200  | 0.17956200  |
| O | 1.36095500  | 3.29825100  | 1.12254700  |
| H | 1.95762900  | 2.93869900  | -0.80929300 |
| C | 1.95131400  | 4.59115200  | 1.15496600  |
| H | 1.91770800  | 5.05688200  | 0.16149500  |
| H | 1.35899900  | 5.18580000  | 1.85074300  |
| H | 2.98834500  | 4.54533200  | 1.49935000  |
| O | 3.24850300  | 2.16612900  | 0.58574700  |
| C | 4.01722700  | 1.50471600  | -0.40182000 |
| H | 4.05471600  | 2.08857600  | -1.33160200 |
| H | 5.02549200  | 1.40205100  | 0.00012500  |
| H | 3.61391200  | 0.50842300  | -0.62291800 |

36



Me<sub>3</sub>Si–Benzaldehyde dimethylacetal<sup>+</sup>. Gibbs free energy: -909.298812

|    |            |             |             |
|----|------------|-------------|-------------|
| C  | 0.60977500 | -0.90888400 | 1.88999800  |
| C  | 0.98507000 | 0.18436500  | 2.67081200  |
| C  | 1.33242600 | 1.38916500  | 2.06721500  |
| C  | 1.30970000 | 1.49874500  | 0.67468400  |
| C  | 0.91732900 | 0.40896100  | -0.10491900 |
| C  | 0.57056800 | -0.79498500 | 0.50149300  |
| H  | 0.34054600 | -1.84653800 | 2.36496400  |
| H  | 1.00566800 | 0.09858800  | 3.75202900  |
| H  | 1.61335200 | 2.24223000  | 2.67544200  |
| H  | 0.86878400 | 0.49853100  | -1.18652100 |
| H  | 0.26426800 | -1.63799200 | -0.10853200 |
| C  | 1.72002200 | 2.76273200  | -0.01256400 |
| O  | 1.50802500 | 3.85690100  | 0.74232200  |
| H  | 1.32532300 | 2.84832300  | -1.02742400 |
| C  | 1.66362800 | 5.11293700  | 0.06886800  |
| H  | 1.03285000 | 5.14243200  | -0.82457700 |
| H  | 1.34366900 | 5.87441700  | 0.77666300  |
| H  | 2.71042700 | 5.27203800  | -0.20313300 |
| O  | 3.25003700 | 2.69772400  | -0.31011700 |
| C  | 4.09320900 | 2.65707900  | 0.87780000  |
| H  | 3.67658000 | 3.35673300  | 1.59960500  |
| H  | 4.11375400 | 1.64249800  | 1.27549400  |
| H  | 5.08562900 | 2.98744200  | 0.57944000  |
| Si | 3.97803900 | 2.11856900  | -1.88290800 |
| C  | 4.37448800 | 0.32997100  | -1.58281500 |
| H  | 3.48138600 | -0.24063100 | -1.31267100 |
| H  | 4.79040000 | -0.10191800 | -2.49944100 |
| H  | 5.12000000 | 0.21076400  | -0.79120000 |
| C  | 2.66549400 | 2.42402100  | -3.16127400 |
| H  | 3.12658400 | 2.21872700  | -4.13446700 |
| H  | 1.79820800 | 1.76502600  | -3.07259300 |
| H  | 2.33146700 | 3.46561300  | -3.17468000 |
| C  | 5.46038500 | 3.21794900  | -2.09798700 |
| H  | 6.28895600 | 2.94227700  | -1.44037300 |
| H  | 5.81255900 | 3.11716100  | -3.13048900 |
| H  | 5.20520300 | 4.26865800  | -1.93171000 |

44

Isosorbide. Gibbs free energy: -1352.429277

|   |             |            |             |
|---|-------------|------------|-------------|
| C | -0.70961800 | 1.17550500 | -0.03222200 |
| C | 0.12940700  | 2.43885900 | 0.12123000  |
| C | -0.80036900 | 3.26623500 | 1.03608300  |
| C | -2.19230300 | 2.87627500 | 0.52155100  |
| C | -1.81453700 | 5.21362500 | 0.26561800  |
| C | -2.54598800 | 4.04148500 | -0.40350200 |
| H | -0.59878500 | 0.52245300 | 0.84448900  |
| H | -2.47402200 | 5.68666700 | 1.00598100  |
| H | -2.10281100 | 3.83410500 | -1.38397100 |

|    |             |            |             |
|----|-------------|------------|-------------|
| H  | -0.63705400 | 2.98030800 | 2.07981900  |
| H  | -2.94310600 | 2.79388000 | 1.31506000  |
| O  | -0.66436700 | 4.66605400 | 0.91082900  |
| O  | -2.06502200 | 1.62525700 | -0.13995400 |
| H  | -0.45716400 | 0.61481300 | -0.93415300 |
| H  | 1.09680100  | 2.23726700 | 0.59662200  |
| H  | -1.47919100 | 5.96949800 | -0.44952300 |
| O  | 0.27405300  | 3.09843800 | -1.11177200 |
| O  | -3.93658100 | 4.23138900 | -0.50532400 |
| Si | -4.65627800 | 5.17792900 | -1.70574200 |
| Si | 1.66578800  | 3.07380100 | -2.05784000 |
| C  | 2.02404600  | 1.31482700 | -2.60635700 |
| H  | 2.90492000  | 1.28804900 | -3.25767500 |
| H  | 2.22516100  | 0.66377800 | -1.74820700 |
| H  | 1.17820300  | 0.89606300 | -3.16176500 |
| C  | 1.24668600  | 4.17865900 | -3.50598600 |
| H  | 1.04335700  | 5.20033400 | -3.16899400 |
| H  | 2.07506900  | 4.21425000 | -4.22159900 |
| H  | 0.36001500  | 3.80787900 | -4.03058600 |
| C  | 3.10942100  | 3.74172500 | -1.06260700 |
| H  | 4.00917100  | 3.78956800 | -1.68630300 |
| H  | 2.89760700  | 4.74990000 | -0.69187100 |
| H  | 3.33788400  | 3.10242900 | -0.20300000 |
| C  | -6.44994900 | 4.65121600 | -1.71463400 |
| H  | -6.90371700 | 4.80023300 | -0.72927400 |
| H  | -7.01931400 | 5.24135000 | -2.44087900 |
| H  | -6.54858600 | 3.59391500 | -1.98028200 |
| C  | -4.49762000 | 6.99509900 | -1.26238200 |
| H  | -4.92710500 | 7.19431100 | -0.27502500 |
| H  | -3.45174200 | 7.31961100 | -1.25295600 |
| H  | -5.03129400 | 7.61197000 | -1.99433900 |
| C  | -3.81473500 | 4.84146800 | -3.34919800 |
| H  | -2.78384400 | 5.21192400 | -3.35951000 |
| H  | -3.79647600 | 3.76989900 | -3.57452300 |
| H  | -4.35606700 | 5.34854100 | -4.15573500 |

57

Me<sub>3</sub>Si-isosorbide<sup>+</sup> Isomer1. Gibbs free energy: -1761.40644

|   |             |            |             |
|---|-------------|------------|-------------|
| C | -0.63950800 | 1.37122200 | -0.25536000 |
| C | 0.22961500  | 2.58291000 | 0.08186300  |
| C | -0.69608300 | 3.26547300 | 1.10563100  |
| C | -2.09578500 | 2.99555700 | 0.54783800  |
| C | -1.75548200 | 5.37275700 | 0.53859800  |
| C | -2.44177000 | 4.26069600 | -0.24807000 |
| H | -0.52201800 | 0.58977400 | 0.50653900  |
| H | -2.38175500 | 5.72670700 | 1.35960800  |
| H | -1.96473000 | 4.16291000 | -1.23050300 |
| H | -0.54381200 | 2.90527400 | 2.12188100  |
| H | -2.84458600 | 2.83502100 | 1.32954500  |

|    |             |            |             |
|----|-------------|------------|-------------|
| O  | -0.57057100 | 4.71940700 | 1.12027200  |
| O  | -1.99012600 | 1.84483400 | -0.26421400 |
| H  | -0.41163200 | 0.95570300 | -1.23658600 |
| H  | 1.18509700  | 2.28030600 | 0.52353400  |
| H  | -1.40143900 | 6.19807600 | -0.07729200 |
| O  | 0.39276700  | 3.45533900 | -1.00016500 |
| O  | -3.81606600 | 4.48890800 | -0.33511700 |
| Si | -4.54091300 | 4.90153900 | -1.81971100 |
| Si | 1.61657300  | 3.38393600 | -2.17237700 |
| C  | 1.60567800  | 1.71499500 | -3.02175300 |
| H  | 2.36312700  | 1.70201700 | -3.81327300 |
| H  | 1.84376800  | 0.90340800 | -2.32588300 |
| H  | 0.63448700  | 1.50679300 | -3.48228900 |
| C  | 1.16439100  | 4.76285800 | -3.34670400 |
| H  | 1.12742500  | 5.73129100 | -2.83790100 |
| H  | 1.90307400  | 4.83359100 | -4.15207200 |
| H  | 0.18481400  | 4.57828400 | -3.79950000 |
| C  | 3.27217500  | 3.66439900 | -1.33861900 |
| H  | 4.07091400  | 3.62883800 | -2.08767200 |
| H  | 3.32320100  | 4.63993100 | -0.84433400 |
| H  | 3.48844600  | 2.88764800 | -0.59660100 |
| C  | -6.33406500 | 5.18853100 | -1.39418200 |
| H  | -6.43932900 | 5.99367300 | -0.66022100 |
| H  | -6.89732800 | 5.46876200 | -2.29062400 |
| H  | -6.78642700 | 4.28255400 | -0.97865300 |
| C  | -3.70102500 | 6.44843200 | -2.46639600 |
| H  | -3.77760500 | 7.26753600 | -1.74354600 |
| H  | -2.63973400 | 6.27258800 | -2.67558500 |
| H  | -4.17061400 | 6.77541400 | -3.40042000 |
| C  | -4.30935700 | 3.47922600 | -3.01651200 |
| H  | -3.24889200 | 3.28276000 | -3.20786600 |
| H  | -4.76020900 | 2.56208200 | -2.62414400 |
| H  | -4.78401600 | 3.70941500 | -3.97659700 |
| Si | 0.79983500  | 5.70215600 | 1.82917000  |
| C  | 1.31396100  | 6.78642800 | 0.41403700  |
| H  | 0.60446100  | 7.59831300 | 0.23200700  |
| H  | 2.28580200  | 7.23676500 | 0.64190800  |
| H  | 1.41860500  | 6.19742000 | -0.50108400 |
| C  | -0.00998700 | 6.57896700 | 3.24893700  |
| H  | 0.73923300  | 7.18451100 | 3.77026100  |
| H  | -0.80461000 | 7.25197600 | 2.91430100  |
| H  | -0.42721000 | 5.86496400 | 3.96515800  |
| C  | 2.05639800  | 4.43426500 | 2.33064600  |
| H  | 2.85067000  | 4.96614300 | 2.86723200  |
| H  | 1.65261900  | 3.68042400 | 3.01191400  |
| H  | 2.51835800  | 3.94093900 | 1.47243700  |

57

Me<sub>3</sub>Si-isosorbide<sup>+</sup> Isomer2. Gibbs free energy: -1761.409565

|    |             |             |             |
|----|-------------|-------------|-------------|
| C  | -0.97268100 | 0.84444800  | -0.32591500 |
| C  | -0.07819900 | 2.04459600  | -0.11187700 |
| C  | -0.96371500 | 2.93453500  | 0.79438900  |
| C  | -2.35593200 | 2.77195000  | 0.18821600  |
| C  | -1.50057600 | 4.97429300  | -0.19567500 |
| C  | -2.47968200 | 3.93942000  | -0.79039500 |
| H  | -1.00421400 | 0.17230300  | 0.53384900  |
| H  | -2.05744000 | 5.75655300  | 0.32931600  |
| H  | -2.11521600 | 3.59700800  | -1.76537000 |
| H  | -0.90678000 | 2.58994100  | 1.82978100  |
| H  | -3.16864800 | 2.75838600  | 0.91482400  |
| O  | -0.66183500 | 4.29999500  | 0.74805300  |
| O  | -2.31943300 | 1.45718200  | -0.47751200 |
| H  | -0.76004300 | 0.31176900  | -1.24916700 |
| H  | 0.84672900  | 1.74740600  | 0.39433600  |
| H  | -0.87533500 | 5.42941100  | -0.96891100 |
| O  | 0.13960200  | 2.67960100  | -1.33719800 |
| O  | -3.79675200 | 4.40722700  | -0.86959600 |
| Si | -4.34815200 | 5.39991900  | -2.13462600 |
| Si | 1.62917700  | 3.26727700  | -1.90071000 |
| C  | 2.75486700  | 1.80572700  | -2.22728800 |
| H  | 3.71307200  | 2.14838700  | -2.63327800 |
| H  | 2.96521300  | 1.24957900  | -1.30714100 |
| H  | 2.30658200  | 1.11652000  | -2.95027000 |
| C  | 1.16218500  | 4.16964000  | -3.46750000 |
| H  | 0.44426600  | 4.96930700  | -3.25727500 |
| H  | 2.04563800  | 4.62080600  | -3.93123000 |
| H  | 0.70983800  | 3.48510800  | -4.19223000 |
| C  | 2.38496800  | 4.40510100  | -0.62172300 |
| H  | 3.33824000  | 4.80087400  | -0.98947400 |
| H  | 1.72088400  | 5.24625400  | -0.40263900 |
| H  | 2.58093800  | 3.87795900  | 0.31800800  |
| C  | -6.20445500 | 5.20086300  | -2.10243200 |
| H  | -6.60532300 | 5.42448300  | -1.10858000 |
| H  | -6.67320800 | 5.88465800  | -2.81801500 |
| H  | -6.49470700 | 4.17925400  | -2.36803200 |
| C  | -3.83175600 | 7.16946700  | -1.79981600 |
| H  | -4.20859300 | 7.51370100  | -0.83118100 |
| H  | -2.74184900 | 7.27881800  | -1.80357900 |
| H  | -4.23322500 | 7.83285300  | -2.57404200 |
| C  | -3.59744500 | 4.79489400  | -3.74294900 |
| H  | -2.51598200 | 4.96438900  | -3.78132300 |
| H  | -3.78398000 | 3.72706600  | -3.89777400 |
| H  | -4.04505100 | 5.33754300  | -4.58283500 |
| Si | -3.81590100 | 0.40445700  | -0.64411300 |
| C  | -4.28862800 | 0.02254800  | 1.11078300  |
| H  | -4.67835100 | 0.90026100  | 1.63372900  |
| H  | -5.07742000 | -0.73745500 | 1.10458600  |

|   |             |             |             |
|---|-------------|-------------|-------------|
| H | -3.44315300 | -0.38037600 | 1.67638700  |
| C | -3.17773000 | -1.04752000 | -1.60632300 |
| H | -2.47654000 | -1.66041500 | -1.03373600 |
| H | -4.03605400 | -1.67853300 | -1.86287500 |
| H | -2.70569100 | -0.73525100 | -2.54230800 |
| C | -4.99828000 | 1.48684100  | -1.56663500 |
| H | -4.62796700 | 1.69848100  | -2.57386300 |
| H | -5.95797000 | 0.96634500  | -1.65496200 |
| H | -5.16192300 | 2.43618000  | -1.05058100 |

44

Isomannide. Gibbs free energy: -1352.41992

|    |             |            |             |
|----|-------------|------------|-------------|
| C  | -1.56087600 | 1.31002600 | 0.35167400  |
| C  | -0.21359600 | 2.00157900 | 0.16333700  |
| C  | -0.48156700 | 3.32642300 | 0.91875700  |
| C  | -2.01338400 | 3.51243100 | 0.82681400  |
| C  | -0.86154700 | 5.48762700 | 0.23912200  |
| C  | -2.19066600 | 4.78129500 | -0.04247500 |
| H  | -1.60562500 | 0.82140300 | 1.33609300  |
| H  | -0.91753800 | 6.04240100 | 1.18748000  |
| H  | -0.14944300 | 3.22664600 | 1.95937400  |
| H  | -2.45409400 | 3.68786700 | 1.81584000  |
| O  | 0.12153400  | 4.46024400 | 0.33155900  |
| O  | -2.55115800 | 2.33332700 | 0.26833500  |
| H  | -1.75818300 | 0.57275300 | -0.42800200 |
| H  | 0.59018400  | 1.42942400 | 0.64226400  |
| H  | -0.56741600 | 6.17150600 | -0.55851300 |
| O  | 0.04472800  | 2.17333100 | -1.20313300 |
| H  | -3.03690600 | 5.38406300 | 0.31143900  |
| O  | -2.34059900 | 4.44215200 | -1.39202400 |
| Si | -3.05570900 | 5.40582500 | -2.56755200 |
| Si | 1.49347900  | 2.68610200 | -1.89509000 |
| C  | -2.97622100 | 4.36603700 | -4.11942400 |
| H  | -3.44219300 | 4.88878100 | -4.96163800 |
| H  | -1.93714300 | 4.14857800 | -4.38782700 |
| H  | -3.49782000 | 3.41415800 | -3.97712800 |
| C  | -4.82775800 | 5.78039600 | -2.07344500 |
| H  | -5.32508800 | 6.36602300 | -2.85467300 |
| H  | -5.39454700 | 4.85477300 | -1.92877200 |
| H  | -4.87525900 | 6.35909100 | -1.14455600 |
| C  | -2.09888300 | 7.00814300 | -2.77900700 |
| H  | -1.04462100 | 6.80932200 | -3.00071700 |
| H  | -2.51587800 | 7.58965000 | -3.60899100 |
| H  | -2.15047900 | 7.63017400 | -1.87858300 |
| C  | 2.84047900  | 2.76694600 | -0.59085900 |
| H  | 3.01015400  | 1.79122900 | -0.12278100 |
| H  | 3.78199100  | 3.08255000 | -1.05420900 |
| H  | 2.58548800  | 3.48959300 | 0.18993800  |
| C  | 1.27821000  | 4.33772200 | -2.75447700 |

|   |            |            |             |
|---|------------|------------|-------------|
| H | 2.18407200 | 4.58886500 | -3.31831600 |
| H | 0.44049300 | 4.30519300 | -3.45931600 |
| H | 1.08537100 | 5.13162700 | -2.02849600 |
| C | 1.91152500 | 1.38592100 | -3.18415500 |
| H | 1.11290900 | 1.30594100 | -3.92983600 |
| H | 2.83774500 | 1.64479300 | -3.70978000 |
| H | 2.04575200 | 0.40212400 | -2.72189900 |

57

Me<sub>3</sub>Si-isomannide<sup>+</sup>. Gibbs free energy: -1761.403626

|    |             |            |             |
|----|-------------|------------|-------------|
| C  | -1.71768600 | 1.24960300 | 0.14434100  |
| C  | -0.38855600 | 1.97046200 | 0.06590400  |
| C  | -0.67839200 | 3.25099000 | 0.89566200  |
| C  | -2.18064800 | 3.53518000 | 0.71835300  |
| C  | -0.91061300 | 5.44850000 | 0.24904900  |
| C  | -2.24795200 | 4.81257000 | -0.14835800 |
| H  | -1.87034500 | 0.73310600 | 1.09401400  |
| H  | -1.02016600 | 6.00023900 | 1.19256100  |
| H  | -0.43476900 | 3.07313500 | 1.94829900  |
| H  | -2.70261100 | 3.65680800 | 1.66746300  |
| O  | 0.01158300  | 4.37573900 | 0.41454600  |
| O  | -2.70903700 | 2.34204000 | 0.07005300  |
| H  | -1.89380300 | 0.59230200 | -0.70493500 |
| H  | 0.38598800  | 1.36527000 | 0.55062900  |
| H  | -0.52265400 | 6.12000800 | -0.51604300 |
| O  | -0.09021300 | 2.23391200 | -1.26484400 |
| H  | -3.08209200 | 5.45149400 | 0.16599900  |
| O  | -2.33859100 | 4.46972000 | -1.49845900 |
| Si | -2.79279600 | 5.52207200 | -2.74902000 |
| Si | 1.40777700  | 2.72656600 | -1.89035400 |
| C  | -2.56475400 | 4.51557500 | -4.30757500 |
| H  | -2.62277000 | 5.17149200 | -5.18303800 |
| H  | -1.59068300 | 4.01726900 | -4.32282800 |
| H  | -3.33959300 | 3.75036100 | -4.41556100 |
| C  | -4.58413900 | 6.02603300 | -2.51732600 |
| H  | -4.86667700 | 6.73624300 | -3.30250200 |
| H  | -5.25869900 | 5.16652200 | -2.58793500 |
| H  | -4.75147400 | 6.52306700 | -1.55528200 |
| C  | -1.71355800 | 7.05461500 | -2.75748100 |
| H  | -0.65299100 | 6.80955500 | -2.87279200 |
| H  | -2.00413100 | 7.69008100 | -3.60178200 |
| H  | -1.83857100 | 7.64700600 | -1.84476400 |
| C  | 2.70997300  | 2.63116600 | -0.54595000 |
| H  | 2.82681400  | 1.61307700 | -0.15942900 |
| H  | 3.67740500  | 2.94292200 | -0.95507500 |
| H  | 2.46517400  | 3.29731800 | 0.28706300  |
| C  | 1.27356600  | 4.45344600 | -2.59799800 |
| H  | 2.16687600  | 4.68598400 | -3.18867600 |
| H  | 0.40419300  | 4.53695000 | -3.25710800 |

|    |             |             |             |
|----|-------------|-------------|-------------|
| H  | 1.18002100  | 5.19924500  | -1.80499300 |
| C  | 1.77121900  | 1.51300700  | -3.27121800 |
| H  | 0.97516200  | 1.52758100  | -4.02348100 |
| H  | 2.71164700  | 1.76884400  | -3.77184700 |
| H  | 1.85823600  | 0.49201300  | -2.88512500 |
| Si | -4.46720500 | 1.98850400  | -0.30019800 |
| C  | -4.44684000 | 1.66414300  | -2.12357300 |
| H  | -3.89514200 | 0.75246400  | -2.36989200 |
| H  | -5.47260500 | 1.54596700  | -2.48821500 |
| H  | -3.98610000 | 2.50625800  | -2.64434800 |
| C  | -4.83425000 | 0.50565900  | 0.75586900  |
| H  | -4.64648100 | 0.71039200  | 1.81405000  |
| H  | -5.89580500 | 0.25856400  | 0.64454200  |
| H  | -4.25753900 | -0.37360500 | 0.45514900  |
| C  | -5.36281700 | 3.52089900  | 0.23389000  |
| H  | -6.43346900 | 3.34312700  | 0.08272600  |
| H  | -5.21261600 | 3.74184300  | 1.29424300  |
| H  | -5.08797400 | 4.39309600  | -0.36183200 |

75

Alpha-Me-glucose. Gibbs free energy: -2360.461538

|    |             |             |             |
|----|-------------|-------------|-------------|
| C  | -2.91621100 | 0.22328400  | -1.07011600 |
| C  | -1.48126500 | 0.78846300  | -0.98886200 |
| C  | -1.45095800 | 2.31166300  | -0.76748000 |
| C  | -2.39450300 | 2.67165700  | 0.37619600  |
| C  | -3.82208400 | 0.79709400  | 0.03241600  |
| H  | -0.43562400 | 2.58801400  | -0.45438300 |
| H  | -0.97900700 | 0.58977300  | -1.94175300 |
| H  | -2.83293400 | -0.86299700 | -0.91576900 |
| H  | -4.85975100 | 0.63177800  | -0.26933400 |
| O  | -3.70319200 | 2.21190200  | 0.11230900  |
| C  | -3.59483500 | 0.10340600  | 1.38092100  |
| H  | -3.92052700 | -0.94080000 | 1.27331600  |
| H  | -2.52804200 | 0.08636200  | 1.62650800  |
| O  | -4.34384600 | 0.75590400  | 2.38273900  |
| O  | -3.50052500 | 0.51315600  | -2.31989200 |
| O  | -0.82820600 | 0.11806800  | 0.07042300  |
| O  | -1.79278600 | 2.95740000  | -1.96091100 |
| Si | -3.90158500 | 0.68580300  | 4.00505400  |
| Si | 0.83089200  | 0.14651300  | 0.38395400  |
| Si | -3.38362300 | -0.46795500 | -3.68194900 |
| Si | -1.13899300 | 4.39141200  | -2.54959800 |
| C  | -2.07077300 | 1.07521400  | 4.18678200  |
| H  | -1.43931600 | 0.30933100  | 3.72348900  |
| H  | -1.81883200 | 2.04301100  | 3.74057800  |
| H  | -1.80803800 | 1.12009200  | 5.24980000  |
| C  | -4.95735400 | 1.98104900  | 4.84364000  |
| H  | -6.02224700 | 1.77274300  | 4.69775800  |
| H  | -4.75993300 | 2.00437300  | 5.92075300  |

|   |             |             |             |
|---|-------------|-------------|-------------|
| H | -4.74544500 | 2.97513400  | 4.43630400  |
| C | -4.24491100 | -1.03389600 | 4.67367200  |
| H | -3.98618100 | -1.09890100 | 5.73631800  |
| H | -5.30412000 | -1.28986300 | 4.56512700  |
| H | -3.65597000 | -1.78683200 | 4.13812200  |
| C | -4.22583100 | -2.10892100 | -3.33195200 |
| H | -5.28459700 | -1.96120500 | -3.09497200 |
| H | -4.16063000 | -2.76630900 | -4.20613100 |
| H | -3.75714100 | -2.62984000 | -2.48973400 |
| C | -4.26456100 | 0.49514100  | -5.01986400 |
| H | -3.78273600 | 1.46606800  | -5.17557400 |
| H | -4.24185700 | -0.05189800 | -5.96862400 |
| H | -5.31167700 | 0.67120100  | -4.75353200 |
| C | -1.58798400 | -0.77039900 | -4.14622600 |
| H | -1.06002300 | 0.17325300  | -4.32141200 |
| H | -1.05369600 | -1.32561900 | -3.36712800 |
| H | -1.53909100 | -1.36164400 | -5.06792100 |
| C | -0.74858800 | 4.04719200  | -4.35125300 |
| H | -0.36035800 | 4.94385800  | -4.84696600 |
| H | 0.00156100  | 3.25419700  | -4.44215000 |
| H | -1.64877800 | 3.72727400  | -4.88731900 |
| C | -2.40394000 | 5.76571500  | -2.41387900 |
| H | -3.33224200 | 5.49187500  | -2.92670300 |
| H | -2.63737500 | 5.96356400  | -1.36369100 |
| H | -2.02343100 | 6.68664000  | -2.87018100 |
| C | 0.42015400  | 4.81909000  | -1.59461300 |
| H | 0.85897700  | 5.73593100  | -2.00397300 |
| H | 0.20338700  | 4.99277500  | -0.53551600 |
| H | 1.17583700  | 4.02894900  | -1.66810200 |
| C | 1.21905000  | 1.51612900  | 1.60904000  |
| H | 0.51821300  | 1.48292300  | 2.45056100  |
| H | 2.23161700  | 1.39262100  | 2.00964200  |
| H | 1.15733600  | 2.51098700  | 1.15589300  |
| C | 1.74290600  | 0.40987800  | -1.23409800 |
| H | 2.82481000  | 0.39980800  | -1.06331700 |
| H | 1.50623100  | -0.37912700 | -1.95597600 |
| H | 1.48780400  | 1.37311300  | -1.68995900 |
| C | 1.20161600  | -1.52000800 | 1.14623300  |
| H | 0.92816800  | -2.33094500 | 0.46370400  |
| H | 2.26840800  | -1.61137400 | 1.37740100  |
| H | 0.64171900  | -1.65215200 | 2.07823400  |
| H | -2.01972500 | 2.20854400  | 1.30519200  |
| O | -2.42875400 | 4.04876300  | 0.51741300  |
| C | -3.10359300 | 4.49347100  | 1.68410900  |
| H | -2.65176000 | 4.05704300  | 2.58448700  |
| H | -2.99239700 | 5.57783300  | 1.71578900  |
| H | -4.16553100 | 4.23260100  | 1.65129200  |

88



Me<sub>3</sub>Si-Alpha-Me-glucose<sup>+</sup>. Gibbs free energy: -2769.434103

|    |             |             |             |
|----|-------------|-------------|-------------|
| C  | 0.84365100  | -1.50693000 | -0.33734500 |
| C  | 0.95061800  | -0.41712700 | 0.74373200  |
| C  | 0.65015400  | 0.99614400  | 0.20470100  |
| C  | -0.70033600 | 0.89243800  | -0.50182400 |
| C  | -0.44594300 | -1.37480500 | -1.16500600 |
| H  | 0.53420700  | 1.64926200  | 1.08214400  |
| H  | 1.97173200  | -0.44028700 | 1.14741600  |
| H  | 0.78609500  | -2.46038500 | 0.20803400  |
| H  | -0.28465900 | -1.87579900 | -2.12170300 |
| O  | -0.69405700 | -0.00896600 | -1.54423100 |
| C  | -1.66101200 | -2.00796600 | -0.49205600 |
| H  | -1.41468100 | -3.05852100 | -0.28678300 |
| H  | -1.85323100 | -1.53047700 | 0.47666000  |
| O  | -2.77253800 | -1.93041900 | -1.35478500 |
| O  | 1.96861500  | -1.46619600 | -1.18206100 |
| O  | -0.02864500 | -0.67969100 | 1.72249700  |
| O  | 1.59584800  | 1.50301500  | -0.68236000 |
| Si | -4.33427600 | -1.77863900 | -0.73313100 |
| Si | 0.24277400  | -0.94752400 | 3.36965600  |
| Si | 2.95008900  | -2.83301800 | -1.36800400 |
| Si | 3.12156500  | 2.13707300  | -0.30573700 |
| C  | -4.44273100 | -0.15451900 | 0.20473600  |
| H  | -3.74081700 | -0.13910100 | 1.04663000  |
| H  | -4.22029100 | 0.68869600  | -0.45784200 |
| H  | -5.44728700 | -0.00773300 | 0.61583500  |
| C  | -5.45478200 | -1.79234800 | -2.22626100 |
| H  | -5.37993200 | -2.74439700 | -2.76128200 |
| H  | -6.49840600 | -1.65303200 | -1.92500500 |
| H  | -5.19077900 | -0.98740100 | -2.91971100 |
| C  | -4.67589000 | -3.20448700 | 0.43630800  |
| H  | -5.68119900 | -3.12148200 | 0.86347400  |
| H  | -4.60237200 | -4.16706600 | -0.08017900 |
| H  | -3.96073200 | -3.20786700 | 1.26659400  |
| C  | 1.89033400  | -4.26278100 | -1.96399300 |
| H  | 1.41215500  | -4.02568700 | -2.92022500 |
| H  | 2.50883300  | -5.15561100 | -2.10773900 |
| H  | 1.10573400  | -4.52004100 | -1.24400700 |
| C  | 4.23678500  | -2.36590900 | -2.63779800 |
| H  | 4.94360700  | -1.63122000 | -2.24177400 |
| H  | 4.80360600  | -3.25463500 | -2.93623200 |
| H  | 3.76826900  | -1.94652500 | -3.53390600 |
| C  | 3.71896800  | -3.24365700 | 0.29353900  |
| H  | 4.28424900  | -2.39158100 | 0.68616100  |
| H  | 2.95881600  | -3.51550500 | 1.03381500  |
| H  | 4.40725500  | -4.09077300 | 0.19920700  |
| C  | 4.43380100  | 0.89519000  | -0.77819000 |
| H  | 5.43190100  | 1.30241600  | -0.58236000 |

|    |             |             |             |
|----|-------------|-------------|-------------|
| H  | 4.32090900  | -0.03492800 | -0.21344000 |
| H  | 4.36450200  | 0.65472300  | -1.84341400 |
| C  | 3.27384200  | 3.68699300  | -1.34015500 |
| H  | 3.10497200  | 3.46344200  | -2.39882000 |
| H  | 2.54921400  | 4.44622100  | -1.03103400 |
| H  | 4.27691400  | 4.11599100  | -1.24167300 |
| C  | 3.20178800  | 2.50507800  | 1.53221200  |
| H  | 4.13535900  | 3.03636500  | 1.74781200  |
| H  | 2.37680800  | 3.13379200  | 1.88342800  |
| H  | 3.20929500  | 1.58295100  | 2.12311800  |
| C  | 0.73040900  | 0.66833400  | 4.18374500  |
| H  | -0.05549800 | 1.42216400  | 4.06638500  |
| H  | 0.89585200  | 0.51888400  | 5.25646900  |
| H  | 1.65539000  | 1.07173100  | 3.75960500  |
| C  | 1.60194400  | -2.22300200 | 3.55550300  |
| H  | 1.78566900  | -2.42830100 | 4.61572900  |
| H  | 1.32518900  | -3.16501400 | 3.07059200  |
| H  | 2.54483800  | -1.87640600 | 3.11847300  |
| C  | -1.41261100 | -1.55735500 | 3.98063500  |
| H  | -1.69192700 | -2.49127200 | 3.48213300  |
| H  | -1.38847100 | -1.73938200 | 5.06014700  |
| H  | -2.19186300 | -0.81465500 | 3.77893700  |
| H  | -1.49207900 | 0.68409600  | 0.22269600  |
| O  | -1.07760800 | 2.17253600  | -1.10360700 |
| Si | -1.71493100 | 3.57740600  | -0.10590500 |
| C  | -2.29894100 | 2.81164900  | 1.48063000  |
| H  | -2.66276400 | 3.63250300  | 2.10949600  |
| H  | -3.13322700 | 2.12345500  | 1.32235000  |
| H  | -1.51163200 | 2.29876400  | 2.03910600  |
| C  | -3.09182500 | 4.24639000  | -1.15332400 |
| H  | -3.64233700 | 4.98525400  | -0.56049100 |
| H  | -2.73892900 | 4.74482500  | -2.05954100 |
| H  | -3.79056700 | 3.45302800  | -1.43369800 |
| C  | -0.24309500 | 4.69128800  | 0.08276800  |
| H  | 0.13892100  | 5.03609500  | -0.88196100 |
| H  | -0.53810200 | 5.57417100  | 0.66023600  |
| H  | 0.56710600  | 4.19318100  | 0.62256800  |
| C  | -0.62391800 | 2.42893400  | -2.48194100 |
| H  | -1.23541800 | 1.82728100  | -3.14786400 |
| H  | -0.78471200 | 3.48994500  | -2.65829500 |
| H  | 0.43124000  | 2.18013200  | -2.53988800 |

75

Beta-Me-glucose. Gibbs free energy: -2360.455616

|   |             |            |             |
|---|-------------|------------|-------------|
| C | -2.65239900 | 0.45968900 | -0.96878200 |
| C | -1.41292700 | 1.35796100 | -0.80257500 |
| C | -1.78535800 | 2.83050900 | -0.57664400 |
| C | -2.94376300 | 3.01776200 | 0.42267600  |
| C | -3.68472200 | 0.72520400 | 0.13085000  |

|    |             |             |             |
|----|-------------|-------------|-------------|
| H  | -0.89777000 | 3.31665700  | -0.14845300 |
| H  | -0.82322700 | 1.31494200  | -1.72762100 |
| H  | -2.31989500 | -0.58322300 | -0.87342100 |
| H  | -3.38181800 | 4.00858900  | 0.23929800  |
| H  | -4.62653800 | 0.27794100  | -0.19987500 |
| O  | -3.99133000 | 2.11799000  | 0.23317700  |
| C  | -3.31753100 | 0.08295700  | 1.46615900  |
| H  | -3.07241300 | -0.97155000 | 1.27131600  |
| H  | -2.43323200 | 0.56728700  | 1.88688900  |
| O  | -4.42233000 | 0.16071300  | 2.34894900  |
| O  | -3.27221400 | 0.67127800  | -2.21750500 |
| O  | -0.66560600 | 0.91460500  | 0.30904900  |
| O  | -2.16171200 | 3.42832900  | -1.79763500 |
| O  | -2.50424200 | 2.94000300  | 1.76187400  |
| C  | -1.97111700 | 4.14453700  | 2.27083500  |
| H  | -2.69091700 | 4.96843200  | 2.16915800  |
| H  | -1.76785600 | 3.97455100  | 3.32916300  |
| H  | -1.03470100 | 4.42759100  | 1.77221300  |
| Si | -4.18228500 | -0.02036900 | 4.00511200  |
| Si | 0.68997400  | -0.07910600 | 0.22826900  |
| Si | -2.91033700 | -0.15717500 | -3.63407100 |
| Si | -1.14482500 | 4.48034800  | -2.63131500 |
| C  | -3.12389300 | 1.38261700  | 4.66379100  |
| H  | -2.15217400 | 1.41735900  | 4.16051300  |
| H  | -3.61400000 | 2.34848600  | 4.50587800  |
| H  | -2.94849900 | 1.25353000  | 5.73785700  |
| C  | -5.89698400 | 0.01507900  | 4.75290100  |
| H  | -6.52106000 | -0.78776300 | 4.34721900  |
| H  | -5.84209000 | -0.11344800 | 5.83949100  |
| H  | -6.39137300 | 0.97059800  | 4.54943900  |
| C  | -3.32261300 | -1.66058800 | 4.32431700  |
| H  | -3.17780300 | -1.81664700 | 5.39907300  |
| H  | -3.91184400 | -2.49780800 | 3.93523500  |
| H  | -2.33617600 | -1.68911300 | 3.84797400  |
| C  | -2.96323800 | -2.00534300 | -3.30590400 |
| H  | -3.93752000 | -2.30694200 | -2.90733800 |
| H  | -2.79122600 | -2.55456900 | -4.23831200 |
| H  | -2.19274300 | -2.31797700 | -2.59267300 |
| C  | -4.23760600 | 0.38030500  | -4.83502400 |
| H  | -4.19716400 | 1.46330700  | -4.99237800 |
| H  | -4.10101300 | -0.10898300 | -5.80546900 |
| H  | -5.23387000 | 0.12561300  | -4.45988300 |
| C  | -1.21440600 | 0.31763800  | -4.29041600 |
| H  | -1.14221700 | 1.40056300  | -4.43540400 |
| H  | -0.40283800 | 0.00641000  | -3.62386900 |
| H  | -1.04586000 | -0.16331400 | -5.26085600 |
| C  | -1.97871200 | 4.73441400  | -4.28410900 |
| H  | -1.37750800 | 5.38916200  | -4.92397900 |

|   |             |             |             |
|---|-------------|-------------|-------------|
| H | -2.11064200 | 3.77899300  | -4.80257900 |
| H | -2.96465200 | 5.19319200  | -4.15780500 |
| C | -0.99660900 | 6.07883000  | -1.66011100 |
| H | -1.97793000 | 6.54485600  | -1.52320000 |
| H | -0.56313000 | 5.89973400  | -0.66962700 |
| H | -0.34903700 | 6.79176000  | -2.18238200 |
| C | 0.55279900  | 3.69850200  | -2.81561100 |
| H | 1.22034500  | 4.36996800  | -3.36687100 |
| H | 1.01026500  | 3.50571700  | -1.83892400 |
| H | 0.50418000  | 2.75011000  | -3.36061900 |
| C | 2.05199400  | 0.81060300  | -0.70488800 |
| H | 2.28493100  | 1.77129800  | -0.23373000 |
| H | 2.96598000  | 0.20625000  | -0.71671300 |
| H | 1.76757000  | 1.00184900  | -1.74541200 |
| C | 0.27275300  | -1.68869200 | -0.64482500 |
| H | 1.13705300  | -2.36207500 | -0.61925600 |
| H | -0.56707900 | -2.19988700 | -0.16191600 |
| H | 0.01845800  | -1.52541200 | -1.69783100 |
| C | 1.13090000  | -0.37205300 | 2.02025400  |
| H | 0.30468600  | -0.86701500 | 2.54172100  |
| H | 2.01845900  | -1.00784900 | 2.10584700  |
| H | 1.33790300  | 0.57466800  | 2.52957400  |

88

Me<sub>3</sub>Si-Beta-Me-glucose<sup>+</sup>. Gibbs free energy: -2769.437814

|    |             |             |             |
|----|-------------|-------------|-------------|
| C  | -2.72214600 | 0.33708900  | -0.76742400 |
| C  | -1.34851300 | 1.02951700  | -0.69523500 |
| C  | -1.51983000 | 2.55278400  | -0.48131900 |
| C  | -2.84877700 | 2.82177900  | 0.21881300  |
| C  | -3.51809700 | 0.57709900  | 0.52913300  |
| H  | -0.70671400 | 2.85312400  | 0.19013200  |
| H  | -0.82565000 | 0.89791400  | -1.64974600 |
| H  | -2.57774000 | -0.74378000 | -0.89195900 |
| H  | -3.63847400 | 3.00086800  | -0.51844500 |
| H  | -4.58231700 | 0.60602400  | 0.26478300  |
| O  | -3.17928200 | 1.84125000  | 1.12724500  |
| C  | -3.29099500 | -0.47806400 | 1.59470300  |
| H  | -3.53113000 | -1.45929900 | 1.16282400  |
| H  | -2.22977500 | -0.47153300 | 1.87039400  |
| O  | -4.12057200 | -0.21175100 | 2.70310800  |
| O  | -3.46111600 | 0.87968600  | -1.83794200 |
| O  | -0.60859100 | 0.51070200  | 0.38357900  |
| O  | -1.51414800 | 3.29036800  | -1.67420700 |
| O  | -2.73941000 | 4.04858400  | 1.01327600  |
| C  | -3.52920700 | 5.16285600  | 0.49133900  |
| H  | -4.58674100 | 4.95106200  | 0.64908600  |
| H  | -3.21920600 | 6.05418900  | 1.02849600  |
| H  | -3.29101300 | 5.26115200  | -0.56579100 |
| Si | -3.71303700 | -0.78049300 | 4.24164600  |

|    |             |             |             |
|----|-------------|-------------|-------------|
| Si | 0.51077600  | -0.75352600 | 0.29592100  |
| Si | -3.39762900 | 0.34871600  | -3.44490700 |
| Si | -0.19530100 | 4.24894200  | -2.13972600 |
| C  | -2.12998800 | 0.05123900  | 4.81435300  |
| H  | -1.32083500 | -0.06503100 | 4.08560600  |
| H  | -2.28612100 | 1.12179400  | 4.97948400  |
| H  | -1.79198100 | -0.39123100 | 5.75798200  |
| C  | -5.15894900 | -0.29653400 | 5.32065700  |
| H  | -6.07900000 | -0.79177200 | 4.99477500  |
| H  | -4.97168400 | -0.57619800 | 6.36288700  |
| H  | -5.32092400 | 0.78607700  | 5.28560300  |
| C  | -3.46600300 | -2.63751200 | 4.15659500  |
| H  | -3.26378300 | -3.04569000 | 5.15281500  |
| H  | -4.35808800 | -3.13400800 | 3.76064100  |
| H  | -2.61798100 | -2.89622900 | 3.51256000  |
| C  | -3.88636900 | -1.46059300 | -3.48984000 |
| H  | -4.88034900 | -1.61008100 | -3.05581300 |
| H  | -3.90741700 | -1.82292000 | -4.52357100 |
| H  | -3.17501900 | -2.08424200 | -2.93721300 |
| C  | -4.63256900 | 1.44798500  | -4.31305500 |
| H  | -4.34040500 | 2.49964800  | -4.22463700 |
| H  | -4.69172800 | 1.20004000  | -5.37806000 |
| H  | -5.63099800 | 1.33163300  | -3.87957300 |
| C  | -1.67794400 | 0.56941000  | -4.16321500 |
| H  | -1.30970400 | 1.58518600  | -3.98672800 |
| H  | -0.95745500 | -0.14035100 | -3.74173100 |
| H  | -1.70911100 | 0.40062600  | -5.24569700 |
| C  | -0.71197900 | 4.96331800  | -3.78373400 |
| H  | 0.04838900  | 5.65674900  | -4.15810900 |
| H  | -0.84758700 | 4.17336000  | -4.52953100 |
| H  | -1.65512800 | 5.51106900  | -3.68932300 |
| C  | 0.06788500  | 5.57450600  | -0.83791800 |
| H  | -0.81803200 | 6.20901700  | -0.73015500 |
| H  | 0.30086600  | 5.14088400  | 0.14068600  |
| H  | 0.90857100  | 6.21802600  | -1.11961300 |
| C  | 1.31706000  | 3.15240000  | -2.26749400 |
| H  | 2.19863300  | 3.73583600  | -2.55419600 |
| H  | 1.53471900  | 2.67191200  | -1.30752500 |
| H  | 1.17130700  | 2.36643200  | -3.01643800 |
| C  | 2.04325200  | -0.16818500 | -0.60612500 |
| H  | 2.49651000  | 0.69131800  | -0.10177000 |
| H  | 2.78784100  | -0.97105800 | -0.64355300 |
| H  | 1.81421400  | 0.12070700  | -1.63750000 |
| C  | -0.24354500 | -2.21429500 | -0.60754400 |
| H  | 0.47785000  | -3.03845800 | -0.63913100 |
| H  | -1.14547400 | -2.57853500 | -0.10430600 |
| H  | -0.50021100 | -1.96522700 | -1.64335900 |
| C  | 0.84689800  | -1.15170900 | 2.08997800  |

|    |             |             |            |
|----|-------------|-------------|------------|
| H  | -0.04557300 | -1.56898000 | 2.56876300 |
| H  | 1.65100800  | -1.88958500 | 2.18033300 |
| H  | 1.14452800  | -0.25298800 | 2.64028500 |
| Si | -2.27281800 | 3.96927100  | 2.82084000 |
| C  | -3.78834500 | 3.38463800  | 3.71388900 |
| H  | -3.63535900 | 3.50856500  | 4.79193200 |
| H  | -4.66315400 | 3.97885900  | 3.43144400 |
| H  | -3.98808100 | 2.33360300  | 3.49334400 |
| C  | -1.83913400 | 5.74436500  | 3.16782000 |
| H  | -2.71081100 | 6.39900400  | 3.24710500 |
| H  | -1.32808000 | 5.76126600  | 4.13763200 |
| H  | -1.14508300 | 6.14957300  | 2.42493200 |
| C  | -0.77892800 | 2.87217300  | 2.88844800 |
| H  | -0.94407800 | 1.89566200  | 2.42841900 |
| H  | 0.08390900  | 3.35136000  | 2.41583100 |
| H  | -0.53566600 | 2.72025100  | 3.94654500 |

70

Glucose-oxocarbenium<sup>+</sup>. Gibbs free energy: -2245.183604

|    |             |             |             |
|----|-------------|-------------|-------------|
| C  | -2.71380700 | 0.34383300  | -0.97544100 |
| C  | -1.59783100 | 1.40100800  | -0.91251900 |
| C  | -2.24453000 | 2.80427200  | -0.97285300 |
| C  | -3.66524800 | 2.84152700  | -0.50629000 |
| C  | -3.72180400 | 0.53156200  | 0.15036800  |
| H  | -1.71677500 | 3.41621700  | -0.21616500 |
| H  | -0.97018100 | 1.31076700  | -1.80514100 |
| H  | -2.28334400 | -0.65791500 | -0.85588300 |
| H  | -4.22816900 | 3.76669400  | -0.63045900 |
| H  | -4.60467300 | -0.07778600 | -0.04263800 |
| O  | -4.29712400 | 1.91242000  | 0.03779200  |
| C  | -3.25860800 | 0.32712100  | 1.57880400  |
| H  | -2.73245600 | -0.63837900 | 1.59416300  |
| H  | -2.53715500 | 1.10107600  | 1.85856800  |
| O  | -4.37715500 | 0.31959800  | 2.42507100  |
| O  | -3.41874300 | 0.49130200  | -2.17580700 |
| O  | -0.86652900 | 1.29072600  | 0.27384700  |
| O  | -2.26047200 | 3.38374000  | -2.23790400 |
| Si | -4.17480700 | 0.11895500  | 4.10013900  |
| Si | 0.53328700  | 0.35054400  | 0.51890100  |
| Si | -3.02054300 | -0.24716600 | -3.65899900 |
| Si | -1.11899800 | 4.55921100  | -2.74360300 |
| C  | -3.03845600 | 1.46962000  | 4.73457400  |
| H  | -2.03841900 | 1.39779500  | 4.29317500  |
| H  | -3.44179600 | 2.46346200  | 4.51474700  |
| H  | -2.92457900 | 1.38238500  | 5.82065600  |
| C  | -5.89720400 | 0.25468600  | 4.80443200  |
| H  | -6.55621500 | -0.50986500 | 4.38097300  |
| H  | -5.87234400 | 0.11587800  | 5.89059500  |
| H  | -6.33190200 | 1.23771000  | 4.59800400  |

|   |             |             |             |
|---|-------------|-------------|-------------|
| C | -3.41332500 | -1.56541400 | 4.41521600  |
| H | -3.29093300 | -1.72685700 | 5.49186600  |
| H | -4.04852000 | -2.36595700 | 4.02237300  |
| H | -2.42319800 | -1.65660300 | 3.95550400  |
| C | -2.82654300 | -2.08589400 | -3.36274500 |
| H | -3.73139900 | -2.51346100 | -2.91916600 |
| H | -2.64293800 | -2.59480700 | -4.31541100 |
| H | -1.98061200 | -2.31109600 | -2.70419900 |
| C | -4.47792800 | 0.15999700  | -4.74844400 |
| H | -4.58704000 | 1.24267700  | -4.86752200 |
| H | -4.34226000 | -0.27882000 | -5.74265000 |
| H | -5.40598500 | -0.23634600 | -4.32488300 |
| C | -1.43436000 | 0.48735300  | -4.33726700 |
| H | -1.47618300 | 1.58070400  | -4.30644000 |
| H | -0.54835500 | 0.15633500  | -3.78476700 |
| H | -1.30189300 | 0.18219400  | -5.38120400 |
| C | -1.53168500 | 4.82947200  | -4.53967400 |
| H | -0.85393400 | 5.57377200  | -4.97106400 |
| H | -1.42683900 | 3.90423000  | -5.11462100 |
| H | -2.55639900 | 5.19535700  | -4.65645500 |
| C | -1.36192600 | 6.09328800  | -1.70228500 |
| H | -2.36699800 | 6.50520300  | -1.83757100 |
| H | -1.21170500 | 5.89296500  | -0.63593200 |
| H | -0.63788800 | 6.86080200  | -1.99660100 |
| C | 0.58288300  | 3.82866800  | -2.48306900 |
| H | 1.35198900  | 4.53412500  | -2.81512000 |
| H | 0.76789600  | 3.61635500  | -1.42471800 |
| H | 0.70954100  | 2.89969600  | -3.04908800 |
| C | 2.01440900  | 1.25166200  | -0.18212300 |
| H | 2.12631900  | 2.24270100  | 0.26927500  |
| H | 2.92646300  | 0.68076400  | 0.02506200  |
| H | 1.93716800  | 1.37347100  | -1.26728300 |
| C | 0.33418800  | -1.30632500 | -0.33569600 |
| H | 1.26014300  | -1.88082800 | -0.22186000 |
| H | -0.47935700 | -1.90221900 | 0.09068500  |
| H | 0.15814300  | -1.18921600 | -1.41075000 |
| C | 0.61787100  | 0.18893200  | 2.37606000  |
| H | -0.25340400 | -0.34714700 | 2.76606800  |
| H | 1.51553900  | -0.36380100 | 2.67247700  |
| H | 0.65518400  | 1.17441600  | 2.85140600  |

13

Me<sub>3</sub>Si<sup>+</sup>. Gibbs free energy: -408.934892

|    |            |            |             |
|----|------------|------------|-------------|
| Si | 0.16595600 | 0.87225200 | 0.00416600  |
| C  | 0.92830600 | 1.17933400 | -1.63264700 |
| H  | 1.42073800 | 2.15700600 | -1.64180000 |
| H  | 1.70909600 | 0.42513800 | -1.79623200 |
| H  | 0.20031600 | 1.11680300 | -2.44310200 |
| C  | 1.10869400 | 1.23121100 | 1.53269800  |

|   |             |             |             |
|---|-------------|-------------|-------------|
| H | 0.68750500  | 2.13529100  | 1.99174500  |
| H | 0.98579300  | 0.41852700  | 2.25545300  |
| H | 2.16765200  | 1.40137600  | 1.33106800  |
| C | -1.53385700 | 0.19775100  | 0.10502000  |
| H | -1.54879800 | -0.79230000 | -0.36729300 |
| H | -1.88744600 | 0.11338700  | 1.13371300  |
| H | -2.21370400 | 0.83366500  | -0.47278800 |
